# Supplementary material for: Lanthanide amide-catalyzed one-pot functionalization of isatins: synthesis of spiro[cyclopropan-1,3′-oxindoles] and 2-oxoindolin-3-yl phosphates
Source: Royal Society of Chemistry journal article supplement (doi:10.1039/c7ob00640c), 2017-01-01

**Lanthanide amide-catalyzed one-pot functionalization of isatins:  
synthesis of spiro[cyclopropan-1,3'-oxindoles]  
and 2-oxoindolin-3-yl phosphates**

Cheng Peng, Jiaojiao Zhai, Mingqiang Xue,\* Fan Xu\*

College of Chemistry, Chemical Engineering and Materials Science,  
Soochow University, Suzhou 215123, P. R. China

xufan@suda.edu.cn    xuemq@sina.com

**SUPPLEMENTARY INFORMATION**

**TABLE OF CONTENTS**

|                                                                   |     |
|-------------------------------------------------------------------|-----|
| Characterization Data .....                                       | S2  |
| Copies of <sup>1</sup> H NMR and <sup>13</sup> C NMR Spectra..... | S15 |
| X-ray structures of <b>4p</b> and <b>4r</b> .....                 | S54 |

## Characterization Data

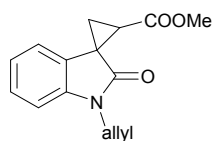

**Methyl 1'-allyl-2'-oxospiro[cyclopropane-1,3'-indoline]-2-carboxylate (4a).** colorless oil (117 mg, 91% yield).  $^1\text{H}$  NMR (400 MHz,  $\text{CDCl}_3$ )  $\delta$  7.25 (t,  $J = 6.8$  Hz, 1H), 7.03 (t,  $J = 7.6$  Hz, 1H), 6.89 (d,  $J = 8.0$  Hz, 1H), 6.85 (d,  $J = 6.8$  Hz, 1H), 5.89–5.80 (m, 1H), 5.26–5.20 (m, 2H), 4.39 (d,  $J = 5.2$  Hz, 2H), 3.74 (s, 3H), 2.67 (t,  $J = 8.4$  Hz, 1H), 2.40 (dd,  $J = 8.0, 4.8$  Hz, 1H), 1.83 (dd,  $J = 8.4, 4.8$  Hz, 1H);  $^{13}\text{C}$  NMR (100 MHz,  $\text{CDCl}_3$ )  $\delta$  173.1, 167.5, 142.8, 131.5, 128.8, 127.7, 122.3, 118.6, 117.5, 109.1, 52.4, 42.7, 33.2, 32.2, 21.1; IR  $\nu$  3003, 2951, 1741, 1706, 1644, 1614, 1489, 1467, 1434, 1381, 1010, 749  $\text{cm}^{-1}$ ; HRMS (ESI) calcd. for  $\text{C}_{15}\text{H}_{16}\text{NO}_3$   $[\text{M} + \text{H}]^+$  258.1125, found 258.1124.

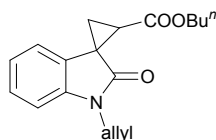

**Butyl 1'-allyl-2'-oxospiro[cyclopropane-1,3'-indoline]-2-carboxylate (4b).** colorless oil (132 mg, 88% yield).  $^1\text{H}$  NMR (400 MHz,  $\text{CDCl}_3$ )  $\delta$  7.25 (t,  $J = 7.6$  Hz, 1H), 7.03 (t,  $J = 7.6$  Hz, 1H), 6.88 (d,  $J = 7.6$  Hz, 1H), 6.85 (d,  $J = 7.6$  Hz, 1H), 5.89–5.79 (m, 1H), 5.25–5.20 (m, 2H), 4.45–4.33 (m, 2H), 4.21–4.05 (m, 2H), 2.66 (t,  $J = 8.4$  Hz, 1H), 2.39 (dd,  $J = 8.0, 4.8$  Hz, 1H), 1.82 (dd,  $J = 8.4, 4.8$  Hz, 1H), 1.64–1.57 (m, 2H), 1.40–1.31 (m, 2H), 0.91 (t,  $J = 7.2$  Hz, 3H);  $^{13}\text{C}$  NMR (100 MHz,  $\text{CDCl}_3$ )  $\delta$  173.1, 167.2, 142.9, 131.6, 129.0, 127.7, 122.2, 118.6, 117.5, 109.1, 65.4, 42.7, 33.5, 32.2, 30.6, 21.1, 19.2, 13.8; IR  $\nu$  2956, 2931, 2871, 1727, 1708, 1644, 1615, 1489, 1467, 1434, 1379, 1018, 760  $\text{cm}^{-1}$ ; HRMS (ESI) calcd. for  $\text{C}_{18}\text{H}_{22}\text{NO}_3$   $[\text{M} + \text{H}]^+$  300.1594, found 300.1601.

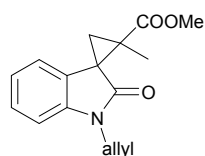

**Methyl 1'-allyl-2-methyl-2'-oxospiro[cyclopropane-1,3'-indoline]-2-carboxylate (4c).** white solid (125 mg, 92% yield), m.p. 90–91  $^\circ\text{C}$ .  $^1\text{H}$  NMR (400 MHz,  $\text{CDCl}_3$ )  $\delta$  7.27 (t,  $J = 7.6$  Hz, 1H), 7.03 (t,  $J = 7.2$  Hz, 1H), 6.98 (d,  $J = 7.2$  Hz, 1H), 6.91 (d,  $J = 7.6$  Hz, 1H), 5.89–5.79 (m, 1H), 5.25–5.19 (m, 2H), 4.44–4.30 (m, 2H), 3.73 (s, 3H), 2.48 (d,  $J = 5.2$  Hz, 1H), 1.61 (s, 3H), 1.60 (d,  $J = 5.2$  Hz, 1H);  $^{13}\text{C}$  NMR (100 MHz,  $\text{CDCl}_3$ )  $\delta$  173.8, 171.3, 143.7, 131.5, 127.4, 126.1, 121.7, 121.5, 117.2, 109.0, 52.3, 42.5, 38.4, 36.2, 26.9, 16.9; IR  $\nu$  3063, 2951, 1737, 1706, 1648, 1610, 1465, 1436, 1381, 1020, 744  $\text{cm}^{-1}$ ; HRMS (ESI) calcd. for  $\text{C}_{16}\text{H}_{18}\text{NO}_3$   $[\text{M} + \text{H}]^+$  272.1281, found 272.1268.

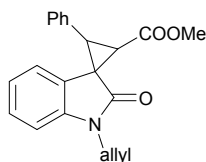

**Methyl 1'-allyl-2'-oxo-3-phenylspiro[cyclopropane-1,3'-indoline]-2-carboxylate (4d).** yellow solid (100 mg, 60% yield), m.p. 103–104 °C.  $^1\text{H}$  NMR (400 MHz,  $\text{CDCl}_3$ )  $\delta$  7.33–7.28 (m, 3H), 7.19–7.12 (m, 3H), 6.86 (d,  $J = 7.6$  Hz, 1H), 6.70 (t,  $J = 7.6$  Hz, 1H), 5.98 (d,  $J = 7.6$  Hz, 1H), 5.93–5.84 (m, 1H), 5.26–5.22 (m, 2H), 4.49–4.37 (m, 2H), 3.95 (d,  $J = 8.0$  Hz, 1H), 3.79 (s, 3H), 3.09 (d,  $J = 8.0$  Hz, 1H);  $^{13}\text{C}$  NMR (100 MHz,  $\text{CDCl}_3$ )  $\delta$  172.8, 167.6, 143.1, 133.2, 131.5, 129.6, 128.6, 127.8, 127.4, 125.5, 121.7, 121.2, 117.4, 108.9, 52.5, 42.7, 38.0, 37.9, 37.0; IR  $\nu$  2981, 2944, 1737, 1706, 1643, 1614, 1489, 1454, 1432, 1381, 1202, 741  $\text{cm}^{-1}$ ; HRMS (ESI) calcd. for  $\text{C}_{21}\text{H}_{20}\text{NO}_3$   $[\text{M} + \text{H}]^+$  334.1438, found 334.1434.

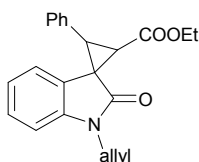

**Ethyl 1'-allyl-2'-oxo-3-phenylspiro[cyclopropane-1,3'-indoline]-2-carboxylate (4e).** yellow solid (123 mg, 71% yield), m.p. 124–125 °C.  $^1\text{H}$  NMR (400 MHz,  $\text{CDCl}_3$ )  $\delta$  7.33–7.29 (m, 3H), 7.20–7.12 (m, 3H), 6.85 (d,  $J = 7.6$  Hz, 1H), 6.70 (t,  $J = 7.6$  Hz, 1H), 5.99 (d,  $J = 8.0$  Hz, 1H), 5.93–5.84 (m, 1H), 5.25–5.21 (m, 2H), 4.51–4.35 (m, 2H), 4.30–4.21 (m, 2H), 3.94 (d,  $J = 8.0$  Hz, 1H), 3.08 (d,  $J = 8.4$  Hz, 1H), 1.28 (t,  $J = 7.2$  Hz, 3H);  $^{13}\text{C}$  NMR (100 MHz,  $\text{CDCl}_3$ )  $\delta$  172.8, 167.2, 143.2, 133.3, 131.6, 129.7, 128.6, 127.9, 127.4, 125.7, 121.7, 121.2, 117.3, 108.9, 61.5, 42.7, 38.0, 37.9, 37.3, 14.3; IR  $\nu$  3008, 2975, 2922, 1725, 1702, 1644, 1614, 1491, 1453, 1436, 1202, 1011, 748  $\text{cm}^{-1}$ ; HRMS (ESI) calcd. for  $\text{C}_{22}\text{H}_{22}\text{NO}_3$   $[\text{M} + \text{H}]^+$  348.1594, found 348.1603.

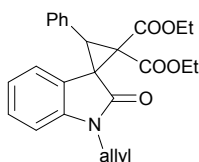

**Diethyl 1'-allyl-2'-oxo-3-phenylspiro[cyclopropane-1,3'-indoline]-2,2-dicarboxylate (4f).** colorless oil (98.5 mg, 47% yield).  $^1\text{H}$  NMR (400 MHz,  $\text{CDCl}_3$ )  $\delta$  7.29–7.23 (m, 4H), 7.11–7.09 (m, 2H), 6.92–6.84 (m, 3H), 5.93–5.84 (m, 1H), 5.30–5.23 (m, 2H), 4.62–4.56 (m, 1H), 4.32–4.03 (m, 6H), 1.27 (t,  $J = 7.2$  Hz, 3H), 1.21 (t,  $J = 7.2$  Hz, 3H);  $^{13}\text{C}$  NMR (100 MHz,  $\text{CDCl}_3$ )  $\delta$  172.6, 166.2, 164.7, 144.1, 131.3, 130.8, 130.0, 128.8, 128.2, 128.1, 127.8, 121.7, 121.3, 117.5, 108.8, 62.1, 62.0, 49.5, 42.8, 42.0, 39.5, 14.1, 14.0; IR  $\nu$  3060, 2982, 2921, 1715, 1611, 1489, 1468, 1446, 1026, 751  $\text{cm}^{-1}$ ; HRMS (ESI) calcd. for  $\text{C}_{25}\text{H}_{26}\text{NO}_5$   $[\text{M} + \text{H}]^+$  420.1811, found 420.1816.

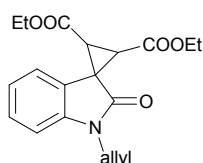

**Diethyl 1'-allyl-2'-oxospiro[cyclopropane-1,3'-indoline]-2,3-dicarboxylate (4g, *trans*).** white solid (94.4 mg, 55% yield), m.p. 75–76 °C. <sup>1</sup>H NMR (400 MHz, CDCl<sub>3</sub>) δ 7.36 (d, *J* = 7.6 Hz, 1H), 7.28 (t, *J* = 7.6 Hz, 1H), 7.03 (t, *J* = 7.6 Hz, 1H), 6.89 (d, *J* = 7.6 Hz, 1H), 5.89–5.80 (m, 1H), 5.25–5.21 (m, 2H), 4.46–4.32 (m, 2H), 4.26–4.07 (m, 4H), 3.30 (d, *J* = 7.6 Hz, 1H), 3.28 (d, *J* = 8.0 Hz, 1H), 1.25 (t, *J* = 7.2 Hz, 3H), 1.23 (t, *J* = 7.2 Hz, 3H); <sup>13</sup>C NMR (100 MHz, CDCl<sub>3</sub>) δ 171.5, 167.3, 165.9, 143.6, 131.3, 128.4, 124.5, 122.8, 122.5, 117.7, 109.2, 61.8, 61.7, 42.8, 37.5, 35.5, 35.5, 14.2; IR ν 3011, 2989, 2936, 1721, 1706, 1613, 1490, 1438, 1380, 1198, 757 cm<sup>-1</sup>; HRMS (ESI) calcd. for C<sub>19</sub>H<sub>22</sub>NO<sub>5</sub> [M + H]<sup>+</sup> 344.1492, found 344.1489.

**Diethyl 1'-allyl-2'-oxospiro[cyclopropane-1,3'-indoline]-2,3-dicarboxylate (4g', *cis*).** yellow solid (30.9 mg, 18% yield), m.p. 88–89 °C. <sup>1</sup>H NMR (400 MHz, CDCl<sub>3</sub>) δ 7.26 (t, *J* = 7.6 Hz, 1H), 7.02 (t, *J* = 7.6 Hz, 1H), 6.87 (d, *J* = 8.0 Hz, 1H), 6.80 (d, *J* = 7.2 Hz, 1H), 5.90–5.81 (m, 1H), 5.27–5.20 (m, 2H), 4.41–4.39 (m, 2H), 4.28–4.20 (m, 4H), 2.86 (s, 2H), 1.28 (t, *J* = 7.2 Hz, 6H). <sup>13</sup>C NMR (100 MHz, CDCl<sub>3</sub>) δ 169.6, 164.8, 143.1, 131.6, 128.4, 127.9, 122.2, 118.5, 117.5, 109.1, 61.7, 42.8, 35.3, 34.3, 14.1; IR ν 2983, 2937, 1716, 1613, 1490, 1468, 1204, 752 cm<sup>-1</sup>; HRMS (ESI) calcd. for C<sub>19</sub>H<sub>22</sub>NO<sub>5</sub> [M + H]<sup>+</sup> 344.1492, found 344.1490.

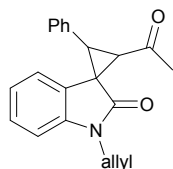

**2-Acetyl-1'-allyl-3-phenylspiro[cyclopropane-1,3'-indolin]-2'-one (4h).** yellow oil (98.4 mg, 62% yield). <sup>1</sup>H NMR (400 MHz, CDCl<sub>3</sub>) δ 7.33–7.28 (m, 3H), 7.18–7.13 (m, 3H), 6.87 (d, *J* = 7.6 Hz, 1H), 6.71 (t, *J* = 7.6 Hz, 1H), 6.01 (d, *J* = 7.2 Hz, 1H), 5.93–5.83 (m, 1H), 5.26–5.21 (m, 2H), 4.50–4.36 (m, 2H), 3.98 (d, *J* = 8.4 Hz, 1H), 3.12 (d, *J* = 8.4 Hz, 1H), 2.38 (s, 3H); <sup>13</sup>C NMR (100 MHz, CDCl<sub>3</sub>) δ 201.2, 172.8, 143.1, 133.4, 131.5, 129.7, 128.6, 127.9, 127.5, 125.7, 121.9, 121.2, 117.6, 109.0, 44.6, 42.7, 39.4, 38.7, 30.3; IR ν 2959, 2920, 1712, 1643, 1610, 1433, 1378, 1191, 1013, 760, 699 cm<sup>-1</sup>; HRMS (ESI) calcd. for C<sub>21</sub>H<sub>20</sub>NO<sub>2</sub> [M + H]<sup>+</sup> 318.1489, found 318.1498.

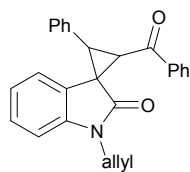

**1'-Allyl-2-benzoyl-3-phenylspiro[cyclopropane-1,3'-indolin]-2'-one (4i).** yellow solid (173 mg, 91% yield), m.p. 179–180 °C. <sup>1</sup>H NMR (400 MHz, CDCl<sub>3</sub>) δ 7.80 (d, *J* = 7.2 Hz, 2H), 7.50 (t, *J* = 7.2 Hz, 1H), 7.37–7.31 (m, 5H), 7.26–7.19 (m, 3H), 6.88 (d, *J* = 8.0 Hz, 1H), 6.79 (t, *J* = 7.6 Hz, 1H), 6.17 (d, *J* = 7.6 Hz, 1H), 5.70–5.61 (m, 1H), 5.08–5.01 (m, 2H), 4.44–4.19 (m, 2H), 4.16 (d, *J* = 8.4 Hz, 1H), 3.64 (d, *J* = 8.4 Hz, 1H); <sup>13</sup>C NMR (100 MHz, CDCl<sub>3</sub>) δ 191.8, 172.3, 143.4, 136.6, 133.8, 133.4, 131.5, 129.9, 128.8, 128.7, 128.4, 127.9, 127.7, 125.5, 122.0, 121.3, 117.3, 109.1, 42.6, 41.8, 39.5, 37.6; IR ν 3056, 2959, 2922, 1701, 1680, 1649, 1597, 1455, 1434, 1214, 1015, 766, 753, 698 cm<sup>-1</sup>; HRMS (ESI) calcd. for C<sub>26</sub>H<sub>22</sub>NO<sub>2</sub> [M + H]<sup>+</sup> 380.1645, found 380.1655.

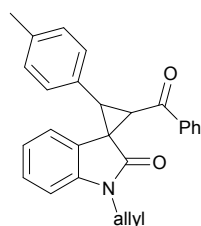

**1'-Allyl-2-benzoyl-3-(p-tolyl)spiro[cyclopropane-1,3'-indolin]-2'-one (4j).** yellow solid (185 mg, 94% yield), m.p. 136–137 °C.  $^1\text{H}$  NMR (400 MHz,  $\text{CDCl}_3$ )  $\delta$  7.79 (d,  $J = 7.6$  Hz, 2H), 7.48 (t,  $J = 7.2$  Hz, 1H), 7.35–7.31 (m, 2H), 7.24–7.18 (m, 2H), 7.11–7.09 (m, 2H), 7.02 (d,  $J = 7.6$  Hz, 1H), 6.88 (d,  $J = 7.6$  Hz, 1H), 6.80 (t,  $J = 7.6$  Hz, 1H), 6.22 (d,  $J = 7.2$  Hz, 1H), 5.69–5.60 (m, 1H), 5.08–5.00 (m, 2H), 4.43–4.15 (m, 2H), 4.12 (d,  $J = 8.4$  Hz, 1H), 3.63 (d,  $J = 8.4$  Hz, 1H), 2.31 (s, 3H);  $^{13}\text{C}$  NMR (100 MHz,  $\text{CDCl}_3$ )  $\delta$  191.8, 172.2, 143.4, 138.3, 136.6, 133.6, 133.4, 131.5, 130.5, 128.7, 128.6, 128.4, 128.3, 127.6, 126.9, 125.6, 121.9, 121.3, 117.3, 109.1, 42.5, 41.8, 39.5, 37.6, 21.5; IR  $\nu$  3054, 3002, 2922, 1700, 1680, 1612, 1489, 1448, 1432, 1377, 1213, 1019, 759, 748  $\text{cm}^{-1}$ ; HRMS (ESI) calcd. for  $\text{C}_{27}\text{H}_{24}\text{NO}_2$   $[\text{M} + \text{H}]^+$  394.1807, found 394.1818.

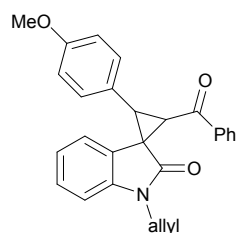

**1'-Allyl-2-benzoyl-3-(4-methoxyphenyl)spiro[cyclopropane-1,3'-indolin]-2'-one (4k).** yellow solid (195 mg, 95% yield), m.p. 180–181 °C.  $^1\text{H}$  NMR (400 MHz,  $\text{CDCl}_3$ )  $\delta$  7.77 (d,  $J = 8.8$  Hz, 2H), 7.32–7.18 (m, 6H), 6.88 (d,  $J = 8.0$  Hz, 1H), 6.83–6.76 (m, 3H), 6.16 (d,  $J = 7.2$  Hz, 1H), 5.73–5.63 (m, 1H), 5.10–5.04 (m, 2H), 4.44–4.16 (m, 2H), 4.13 (d,  $J = 8.0$  Hz, 1H), 3.80 (s, 3H), 3.60 (d,  $J = 8.4$  Hz, 1H);  $^{13}\text{C}$  NMR (100 MHz,  $\text{CDCl}_3$ )  $\delta$  190.3, 172.3, 163.8, 143.4, 134.0, 131.6, 130.7, 129.9, 129.8, 128.6, 127.9, 127.6, 125.6, 121.9, 121.2, 117.3, 114.0, 109.1, 55.6, 42.6, 41.8, 39.4, 37.7; IR  $\nu$  3060, 2920, 2850, 1711, 1673, 1603, 1509, 1488, 1452, 1254, 1024, 1014, 826, 747, 734, 698  $\text{cm}^{-1}$ ; HRMS (ESI) calcd. for  $\text{C}_{27}\text{H}_{24}\text{NO}_3$   $[\text{M} + \text{H}]^+$  410.1756, found 410.1766.

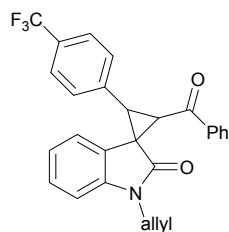

**1'-Allyl-2-benzoyl-3-(4-(trifluoromethyl)phenyl)spiro[cyclopropane-1,3'-indolin]-2'-one (4l).** white solid (159 mg, 71% yield), m.p. 146–147 °C.  $^1\text{H}$  NMR (400 MHz,  $\text{CDCl}_3$ )  $\delta$  7.78 (d,  $J = 7.6$  Hz, 2H), 7.59 (d,  $J = 7.6$  Hz, 2H), 7.50 (t,  $J = 7.2$  Hz, 1H), 7.39–7.32 (m, 4H), 7.25 (t,  $J = 7.2$  Hz, 1H), 6.91 (d,  $J = 7.6$  Hz, 1H), 6.83 (t,  $J = 7.6$  Hz, 1H), 6.17 (d,  $J = 7.6$  Hz, 1H), 5.69–5.60 (m, 1H), 5.08–5.00 (m, 2H), 4.43–4.18 (m, 2H), 4.15 (d,  $J = 7.6$  Hz, 1H), 3.67 (d,  $J = 8.4$  Hz, 1H);  $^{13}\text{C}$

NMR (100 MHz, CDCl<sub>3</sub>)  $\delta$  191.3, 171.8, 143.4, 138.0, 136.3, 133.6, 131.2, 130.3, 130.1 (d,  $J$  = 32 Hz), 128.8, 128.3, 128.1, 125.6 (d,  $J$  = 4 Hz), 125.4, 123.5 (d,  $J$  = 263 Hz), 122.7, 121.1, 117.4, 109.4, 42.6, 41.6, 39.3, 36.8; IR  $\nu$  3059, 2990, 1707, 1686, 1599, 1488, 1449, 1440, 1383, 1355, 1225, 1016, 847, 749, 740, 691 cm<sup>-1</sup>; HRMS (ESI) calcd. for C<sub>27</sub>H<sub>21</sub>F<sub>3</sub>NO<sub>2</sub> [M + H]<sup>+</sup> 448.1524, found 448.1532.

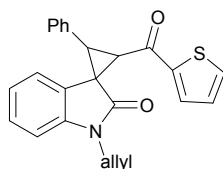

**1'-Allyl-2-phenyl-3-(thiophene-2-carbonyl)spiro[cyclopropane-1,3'-indolin]-2'-one (4m).**

yellow solid (181 mg, 94% yield), m.p. 185–186 °C. <sup>1</sup>H NMR (400 MHz, CDCl<sub>3</sub>)  $\delta$  7.58 (dd,  $J$  = 5.2, 1.2 Hz, 1H), 7.44 (dd,  $J$  = 4.0, 1.2 Hz, 1H), 7.32–7.31 (m, 3H), 7.26–7.24 (m, 2H), 7.20 (t,  $J$  = 8.0 Hz, 1H), 7.00 (dd,  $J$  = 5.2, 4.0 Hz, 1H), 6.88 (d,  $J$  = 8.0 Hz, 1H), 6.78 (t,  $J$  = 7.6 Hz, 1H), 6.14 (d,  $J$  = 7.2 Hz, 1H), 5.76–5.67 (m, 1H), 5.14–5.07 (m, 2H), 4.46–4.21 (m, 2H), 4.14 (d,  $J$  = 8.4 Hz, 1H), 3.61 (d,  $J$  = 8.4 Hz, 1H); <sup>13</sup>C NMR (100 MHz, CDCl<sub>3</sub>)  $\delta$  184.4, 172.2, 143.8, 143.3, 134.0, 133.6, 132.2, 131.5, 129.8, 128.7, 128.1, 127.9, 127.7, 125.5, 122.0, 121.2, 117.4, 109.1, 42.7, 42.3, 37.4, 37.7; IR  $\nu$  2965, 1697, 1666, 1609, 1432, 1377, 1213, 1019, 759, 751, 706 cm<sup>-1</sup>; HRMS (ESI) calcd. for C<sub>24</sub>H<sub>20</sub>NO<sub>2</sub>S [M + H]<sup>+</sup> 386.1215, found 386.1229.

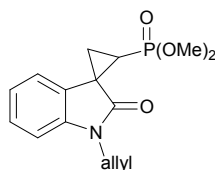

**Dimethyl (1'-allyl-2'-oxospiro[cyclopropane-1,3'-indolin]-2-yl)phosphonate (4n).**

yellow oil (101 mg, 66% yield). <sup>1</sup>H NMR (400 MHz, CDCl<sub>3</sub>)  $\delta$  7.25 (t,  $J$  = 7.6 Hz, 1H), 7.02 (t,  $J$  = 7.6 Hz, 1H), 6.88 (d,  $J$  = 7.6 Hz, 1H), 6.80 (d,  $J$  = 7.6 Hz, 1H), 5.92–5.82 (m, 1H), 5.27–5.21 (m, 2H), 4.49–4.36 (m, 2H), 3.83 (d,  $J$  = 10.8 Hz, 3H), 3.77 (d,  $J$  = 11.2 Hz, 3H), 2.30–2.24 (m, 1H), 1.99–1.91 (m, 2H); <sup>13</sup>C NMR (100 MHz, CDCl<sub>3</sub>)  $\delta$  173.2 (d,  $J$  = 6.5 Hz), 142.9, 131.5, 128.7, 127.9, 122.3, 118.5, 117.5, 109.1, 53.4 (d,  $J$  = 6.3 Hz), 53.1 (d,  $J$  = 6.4 Hz), 42.8, 31.7 (d,  $J$  = 4.4 Hz), 25.6 (d,  $J$  = 194 Hz), 22.5 (d,  $J$  = 5.5 Hz); IR  $\nu$  3057, 2955, 2852, 1716, 1490, 1380, 1245, 1026, 829, 752 cm<sup>-1</sup>; HRMS (ESI) calcd. for C<sub>15</sub>H<sub>19</sub>NO<sub>4</sub>P [M + H]<sup>+</sup> 308.1052, found 308.1065.

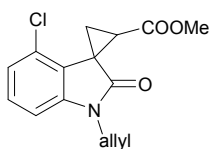

**Methyl 1'-allyl-4'-chloro-2'-oxospiro[cyclopropane-1,3'-indoline]-2-carboxylate (4o).**

yellow solid (105 mg, 72% yield), m.p. 101–103 °C. <sup>1</sup>H NMR (400 MHz, CDCl<sub>3</sub>)  $\delta$  7.16 (t,  $J$  = 8.0 Hz, 1H), 6.94 (d,  $J$  = 8.0 Hz, 1H), 6.80 (d,  $J$  = 8.0 Hz, 1H), 5.87–5.77 (m, 1H), 5.23–5.19 (m, 2H), 4.38–4.36 (m, 2H), 3.74 (s, 3H), 3.48 (t,  $J$  = 8.4 Hz, 1H), 2.53 (dd,  $J$  = 8.8, 4.8 Hz, 1H), 2.21 (dd,  $J$  = 8.0, 4.8 Hz, 1H); <sup>13</sup>C NMR (100 MHz, CDCl<sub>3</sub>)  $\delta$  172.7, 168.1, 144.8, 131.2, 128.6, 127.8,

123.7, 123.4, 117.7, 107.8, 52.5, 42.9, 33.0, 29.3, 17.9; IR  $\nu$  2999, 2953, 1736, 1711, 1607, 1451, 1389, 1013, 780  $\text{cm}^{-1}$ ; HRMS (ESI) calcd. for  $\text{C}_{15}\text{H}_{15}\text{ClNO}_3$   $[\text{M} + \text{H}]^+$  292.0740, found 292.0749.

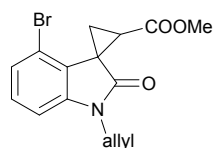

**Methyl 1'-allyl-4'-bromo-2'-oxospiro[cyclopropane-1,3'-indoline]-2-carboxylate (4p).** yellow solid (134 mg, 80% yield), m.p. 111–113 °C.  $^1\text{H}$  NMR (400 MHz,  $\text{CDCl}_3$ )  $\delta$  7.13–7.07 (m, 2H), 6.84 (dd,  $J = 7.2, 2.0$  Hz, 1H), 5.86–5.77 (m, 1H), 5.23–5.18 (m, 2H), 4.38–4.36 (m, 2H), 3.74 (s, 3H), 3.56 (t,  $J = 8.4$  Hz, 1H), 2.60 (dd,  $J = 9.2, 4.8$  Hz, 1H), 2.16 (dd,  $J = 8.4, 4.8$  Hz, 1H);  $^{13}\text{C}$  NMR (100 MHz,  $\text{CDCl}_3$ )  $\delta$  172.8, 168.2, 145.1, 131.2, 128.9, 126.6, 125.0, 117.8, 115.6, 108.4, 52.5, 42.8, 33.6, 29.2, 17.9; IR  $\nu$  2998, 2951, 1734, 1710, 1604, 1577, 1447, 1387, 1053, 1008, 777  $\text{cm}^{-1}$ ; HRMS (ESI) calcd. for  $\text{C}_{15}\text{H}_{15}\text{BrNO}_3$   $[\text{M} + \text{H}]^+$  336.0235, found 336.0233.

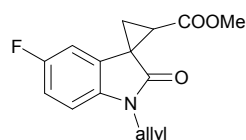

**Methyl 1'-allyl-5'-fluoro-2'-oxospiro[cyclopropane-1,3'-indoline]-2-carboxylate (4q).** yellow oil (124 mg, 90% yield).  $^1\text{H}$  NMR (400 MHz,  $\text{CDCl}_3$ )  $\delta$  6.97–6.92 (m, 1H), 6.80 (dd,  $J = 8.4, 4.0$  Hz, 1H), 6.62 (dd,  $J = 8.0, 2.4$  Hz, 1H), 5.88–5.78 (m, 1H), 5.24–5.21 (m, 2H), 4.38–4.37 (m, 2H), 3.75 (s, 3H), 2.67 (t,  $J = 8.4$  Hz, 1H), 2.42 (dd,  $J = 8.0, 5.2$  Hz, 1H), 1.83 (dd,  $J = 8.4, 5.2$  Hz, 1H);  $^{13}\text{C}$  NMR (100 MHz,  $\text{CDCl}_3$ )  $\delta$  172.8, 167.2, 159.2 (d,  $J = 239$  Hz), 138.8 (d,  $J = 1.8$  Hz), 131.4, 130.5 (d,  $J = 8.7$  Hz), 117.7, 113.9 (d,  $J = 23.3$  Hz), 109.7 (d,  $J = 8.1$  Hz), 106.9 (d,  $J = 25.5$  Hz), 52.5, 42.9, 33.5, 32.5 (d,  $J = 2.2$  Hz), 21.4; IR  $\nu$  2952, 1701, 1489, 1435, 1173, 1013, 804  $\text{cm}^{-1}$ ; HRMS (ESI) calcd. for  $\text{C}_{15}\text{H}_{15}\text{FNO}_3$   $[\text{M} + \text{H}]^+$  276.1036, found 276.1040.

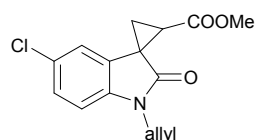

**Methyl 1'-allyl-5'-chloro-2'-oxospiro[cyclopropane-1,3'-indoline]-2-carboxylate (4r).** white solid (134 mg, 92% yield), m.p. 92–93 °C.  $^1\text{H}$  NMR (400 MHz,  $\text{CDCl}_3$ )  $\delta$  7.22 (d,  $J = 8.4$  Hz, 1H), 6.84–6.79 (m, 2H), 5.87–5.77 (m, 1H), 5.24–5.19 (m, 2H), 4.38–4.36 (m, 2H), 3.74 (s, 3H), 2.68 (t,  $J = 8.4$  Hz, 1H), 2.42 (dd,  $J = 8.0, 5.2$  Hz, 1H), 1.85 (dd,  $J = 8.4, 5.2$  Hz, 1H);  $^{13}\text{C}$  NMR (100 MHz,  $\text{CDCl}_3$ )  $\delta$  172.5, 167.0, 141.3, 131.1, 130.5, 127.6, 127.5, 119.2, 117.7, 109.9, 52.4, 42.7, 33.4, 32.0, 21.3; IR  $\nu$  3085, 2952, 1741, 1710, 1614, 1486, 1436, 1390, 1046, 1011, 807  $\text{cm}^{-1}$ ; HRMS (ESI) calcd. for  $\text{C}_{15}\text{H}_{15}\text{ClNO}_3$   $[\text{M} + \text{H}]^+$  292.0735, found 292.0746.

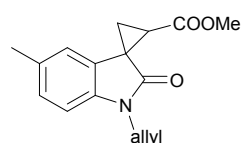

**Methyl 1'-allyl-5'-methyl-2'-oxospiro[cyclopropane-1,3'-indoline]-2-carboxylate (4s).** yellow

oil (117 mg, 86% yield). <sup>1</sup>H NMR (400 MHz, CDCl<sub>3</sub>) δ 7.04 (d, *J* = 8.0 Hz, 1H), 6.77 (d, *J* = 7.6 Hz, 1H), 6.67 (s, 1H), 5.88–5.78 (m, 1H), 5.24–5.18 (m, 2H), 4.37–4.35 (m, 2H), 3.73 (s, 3H), 2.64 (t, *J* = 8.4 Hz, 1H), 2.38 (dd, *J* = 8.0, 5.2 Hz, 1H), 2.32 (s, 3H), 1.80 (dd, *J* = 8.8, 4.8 Hz, 1H); <sup>13</sup>C NMR (100 MHz, CDCl<sub>3</sub>) δ 173.1, 167.6, 140.5, 131.9, 131.7, 128.9, 128.0, 119.4, 117.5, 108.9, 52.4, 42.8, 33.2, 32.3, 21.2, 21.1; IR ν 2951, 2862, 1742, 1705, 1644, 1599, 1494, 1435, 1390, 1011, 870, 806 cm<sup>-1</sup>; HRMS (ESI) calcd. for C<sub>16</sub>H<sub>18</sub>NO<sub>3</sub> [M + H]<sup>+</sup> 272.1287, found 272.1297.

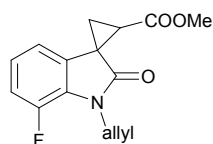

**Methyl 1'-allyl-7'-fluoro-2'-oxospiro[cyclopropane-1,3'-indoline]-2-carboxylate (4t).** yellow oil (118 mg, 86% yield). <sup>1</sup>H NMR (400 MHz, CDCl<sub>3</sub>) δ 7.02–6.94 (m, 2H), 6.64 (d, *J* = 6.8 Hz, 1H), 5.96–5.87 (m, 1H), 5.22–5.15 (m, 2H), 4.52–4.50 (m, 2H), 3.74 (s, 3H), 2.68 (t, *J* = 8.4 Hz, 1H), 2.42 (dd, *J* = 8.0, 5.2 Hz, 1H), 1.85 (dd, *J* = 8.4, 5.2 Hz, 1H); <sup>13</sup>C NMR (100 MHz, CDCl<sub>3</sub>) δ 172.7, 167.1, 147.4 (d, *J* = 243 Hz), 132.3, 131.8 (d, *J* = 4.1 Hz), 129.4 (d, *J* = 9.4 Hz), 122.9 (d, *J* = 6.6 Hz), 117.0, 115.8 (d, *J* = 19.6 Hz), 114.5 (d, *J* = 3.1 Hz), 52.5, 44.2 (d, *J* = 4.7 Hz), 33.9, 32.4 (d, *J* = 2.9 Hz), 21.7; IR ν 3086, 2986, 2953, 1716, 1634, 1597, 1435, 1377, 1206, 1177, 1022, 778 cm<sup>-1</sup>; HRMS (ESI) calcd. for C<sub>15</sub>H<sub>15</sub>FNO<sub>3</sub> [M + H]<sup>+</sup> 276.1036, found 276.1039.

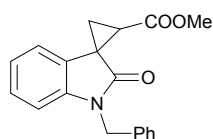

**Methyl 1'-benzyl-2'-oxospiro[cyclopropane-1,3'-indoline]-2-carboxylate (4u).** yellow solid (135 mg, 88% yield), m.p. 101–103 °C. <sup>1</sup>H NMR (400 MHz, CDCl<sub>3</sub>) δ 7.29–7.25 (m, 5H), 7.16 (t, *J* = 7.6 Hz, 1H), 6.99 (t, *J* = 7.6 Hz, 1H), 6.84 (d, *J* = 7.2 Hz, 1H), 6.77 (d, *J* = 8.0 Hz, 1H), 4.95 (s, 2H), 3.76 (s, 3H), 2.69 (t, *J* = 8.4 Hz, 1H), 2.44 (dd, *J* = 8.0, 5.2 Hz, 1H), 1.85 (dd, *J* = 8.4, 5.2 Hz, 1H); <sup>13</sup>C NMR (100 MHz, CDCl<sub>3</sub>) δ 173.6, 167.6, 142.8, 136.0, 128.9, 128.8, 127.8, 127.7, 127.5, 122.4, 118.7, 109.3, 52.6, 44.2, 33.5, 32.4, 21.1; IR ν 3060, 2950, 1742, 1707, 1489, 1453, 1435, 1384, 1011, 727, 696 cm<sup>-1</sup>; HRMS (ESI) calcd. for C<sub>19</sub>H<sub>18</sub>NO<sub>3</sub> [M + H]<sup>+</sup> 308.1281, found 308.1282.

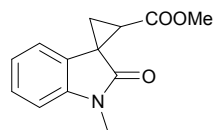

**Methyl 1'-ethyl-2'-oxospiro[cyclopropane-1,3'-indoline]-2-carboxylate (4v).** yellow solid (99.3 mg, 81% yield), m.p. 56–57 °C. <sup>1</sup>H NMR (400 MHz, CDCl<sub>3</sub>) δ 7.28 (t, *J* = 7.6 Hz, 1H), 7.02 (t, *J* = 7.6 Hz, 1H), 6.91 (d, *J* = 8.0 Hz, 1H), 6.84 (d, *J* = 7.2 Hz, 1H), 3.84–3.78 (m, 2H), 3.75 (s, 3H), 2.65 (t, *J* = 8.4 Hz, 1H), 2.38 (dd, *J* = 8.0, 4.8 Hz, 1H), 1.80 (dd, *J* = 8.4, 4.8 Hz, 1H), 1.27 (t, *J* = 7.2 Hz, 3H); <sup>13</sup>C NMR (100 MHz, CDCl<sub>3</sub>) δ 173.0, 167.7, 142.8, 129.1, 127.8, 122.1, 118.7, 108.4,



52.4, 35.2, 33.0, 32.4, 21.1, 12.9; IR  $\nu$  3059, 2984, 2943, 1724, 1491, 1457, 1437, 1374, 1012, 749  $\text{cm}^{-1}$ ; HRMS (ESI) calcd. for  $\text{C}_{14}\text{H}_{16}\text{NO}_3$   $[\text{M} + \text{H}]^+$  246.1130, found 246.1137.

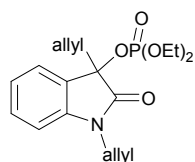

**1,3-Diallyl-2-oxoindolin-3-yl diethyl phosphate (7a).** yellow oil (168 mg, 92%).  $^1\text{H}$  NMR (400 MHz,  $\text{CDCl}_3$ )  $\delta$  7.46 (d,  $J = 7.2$  Hz, 1H), 7.31 (t,  $J = 7.6$  Hz, 1H), 7.07 (t,  $J = 7.6$  Hz, 1H), 6.81 (d,  $J = 8.0$  Hz, 1H), 5.87–5.78 (m, 1H), 5.58–5.46 (m, 1H), 5.33–5.20 (m, 2H), 5.09–5.04 (m, 2H), 4.41 (dd,  $J = 16.4, 5.6$  Hz, 1H), 4.26 (dd,  $J = 16.4, 5.2$  Hz, 1H), 4.07–3.83 (m, 4H), 2.94 (dd,  $J = 13.2, 6.4$  Hz, 1H), 2.72 (dd,  $J = 13.2, 8.4$  Hz, 1H), 1.24–1.19 (m, 6H);  $^{13}\text{C}$  NMR (100 MHz,  $\text{CDCl}_3$ )  $\delta$  173.5 (d,  $J = 2.1$  Hz), 143.0, 131.2, 130.3, 129.4, 126.4, 124.9, 122.4, 120.8, 117.6, 109.4, 80.6 (d,  $J = 6.8$  Hz), 63.9 (d,  $J = 6.0$  Hz), 63.8 (d,  $J = 5.6$  Hz), 42.5, 42.2 (d,  $J = 10.0$  Hz), 15.9 (d,  $J = 6.8$  Hz), 15.8 (d,  $J = 5.9$  Hz); IR  $\nu$  2983, 1725, 1644, 1613, 1489, 1367, 1266, 1022, 819, 757  $\text{cm}^{-1}$ ; HRMS (ESI) calcd. for  $\text{C}_{18}\text{H}_{25}\text{NO}_5\text{P}$   $[\text{M} + \text{H}]^+$  366.1465, found 366.1469.

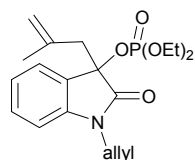

**1-Allyl-3-(2-methylallyl)-2-oxoindolin-3-yl diethyl phosphate (7b).** yellow oil (157 mg, 83% yield).  $^1\text{H}$  NMR (400 MHz,  $\text{CDCl}_3$ )  $\delta$  7.49 (d,  $J = 7.6$  Hz, 1H), 7.30 (t,  $J = 7.6$  Hz, 1H), 7.07 (t,  $J = 7.6$  Hz, 1H), 6.80 (d,  $J = 8.0$  Hz, 1H), 5.86–5.77 (m, 1H), 5.32–5.20 (m, 2H), 4.77–4.60 (m, 2H), 4.46–4.40 (m, 1H), 4.25–4.20 (m, 1H), 4.06–3.81 (m, 4H), 2.90 (d,  $J = 12.8$  Hz, 1H), 2.78 (d,  $J = 12.8$  Hz, 1H), 1.49 (s, 3H), 1.22 (t,  $J = 7.2$  Hz, 3H), 1.21 (t,  $J = 7.2$  Hz, 3H);  $^{13}\text{C}$  NMR (100 MHz,  $\text{CDCl}_3$ )  $\delta$  173.4 (d,  $J = 2.3$  Hz), 143.1, 137.5, 131.0, 130.2, 126.3, 125.2, 122.0, 117.4, 117.0, 109.2, 81.1 (d,  $J = 7.0$  Hz), 63.6 (d,  $J = 5.9$  Hz), 63.6 (d,  $J = 5.5$  Hz), 44.9 (d,  $J = 9.9$  Hz), 42.4, 23.7, 15.7 (d,  $J = 6.5$  Hz), 15.6 (d,  $J = 6.4$  Hz); IR  $\nu$  2983, 1729, 1645, 1613, 1489, 1363, 1268, 1022, 816, 752  $\text{cm}^{-1}$ ; HRMS (ESI) calcd. for  $\text{C}_{19}\text{H}_{27}\text{NO}_5\text{P}$   $[\text{M} + \text{H}]^+$  380.1621, found 380.1622.

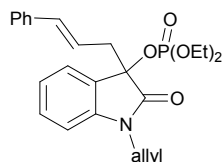

**1-Allyl-3-cinnamyl-2-oxoindolin-3-yl diethyl phosphate (7c).** yellow oil (214 mg, 97% yield).  $^1\text{H}$  NMR (400 MHz,  $\text{CDCl}_3$ )  $\delta$  7.48 (d,  $J = 7.2$  Hz, 1H), 7.30 (t,  $J = 7.6$  Hz, 1H), 7.26–7.18 (m, 5H), 7.07 (t,  $J = 7.2$  Hz, 1H), 6.79 (d,  $J = 8.0$  Hz, 1H), 6.38 (d,  $J = 15.6$  Hz, 1H), 5.91–5.84 (m, 1H), 5.77–5.68 (m, 1H), 5.23–5.19 (m, 1H), 5.07–5.05 (m, 1H), 4.40 (dd,  $J = 16.4, 5.2$  Hz, 1H), 4.21 (dd,  $J = 16.4, 5.2$  Hz, 1H), 4.08–3.84 (m, 4H), 3.10 (dd,  $J = 13.2, 6.4$  Hz, 1H), 2.85 (dd,  $J = 13.2, 8.8$  Hz, 1H), 1.24–1.19 (m, 6H);  $^{13}\text{C}$  NMR (100 MHz,  $\text{CDCl}_3$ )  $\delta$  173.3 (d,  $J = 2.0$  Hz), 142.7, 136.5, 135.4, 130.7, 130.1, 128.2, 127.3, 126.2, 125.9, 124.7, 122.2, 120.4, 117.3, 109.2, 80.7 (d,  $J$

= 6.8 Hz), 63.7 (d,  $J = 5.9$  Hz), 63.6 (d,  $J = 5.5$  Hz), 42.2, 41.2 (d,  $J = 10.1$  Hz), 15.7 (d,  $J = 5.9$  Hz), 15.6 (d,  $J = 6.0$  Hz); IR  $\nu$  2985, 1727, 1643, 1612, 1487, 1362, 1265, 1024, 815, 754, 744, 690  $\text{cm}^{-1}$ ; HRMS (ESI) calcd. for  $\text{C}_{24}\text{H}_{28}\text{NNaO}_5\text{P}$   $[\text{M} + \text{Na}]^+$  464.1603, found 464.1597.

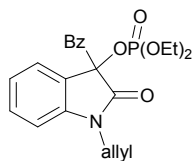

**1-Allyl-3-benzyl-2-oxoindolin-3-yl diethyl phosphate (7d).** yellow oil (204 mg, 98% yield).  $^1\text{H}$  NMR (400 MHz,  $\text{CDCl}_3$ )  $\delta$  7.34 (d,  $J = 7.6$  Hz, 1H), 7.23 (t,  $J = 7.6$  Hz, 1H), 7.13–7.02 (m, 4H), 6.90–6.88 (m, 2H), 6.59 (d,  $J = 8.0$  Hz, 1H), 5.50–5.41 (m, 1H), 4.98 (dd,  $J = 10.4, 1.2$  Hz, 1H), 4.78 (dd,  $J = 17.2, 0.8$  Hz, 1H), 4.29 (dd,  $J = 16.8, 4.8$  Hz, 1H), 4.10–3.84 (m, 5H), 3.49 (d,  $J = 12.8$  Hz, 1H), 3.29 (d,  $J = 12.4$  Hz, 1H), 1.24 (t,  $J = 7.2$  Hz, 3H), 1.21 (t,  $J = 7.2$  Hz, 3H);  $^{13}\text{C}$  NMR (100 MHz,  $\text{CDCl}_3$ )  $\delta$  173.1 (d,  $J = 2.0$  Hz), 142.8, 132.4, 130.4, 130.3, 130.1, 127.5, 126.8, 125.7, 124.9, 121.9, 116.9, 109.1, 81.6 (d,  $J = 6.9$  Hz), 63.6 (d,  $J = 5.9$  Hz), 63.6 (d,  $J = 5.6$  Hz), 43.6 (d,  $J = 10.4$  Hz), 42.0, 15.7, 15.6; IR  $\nu$  2983, 1727, 1645, 1613, 1489, 1455, 1365, 1268, 1023, 804, 751, 731, 699  $\text{cm}^{-1}$ ; HRMS (ESI) calcd. for  $\text{C}_{22}\text{H}_{27}\text{NO}_5\text{P}$   $[\text{M} + \text{H}]^+$  416.1621, found 416.1622.

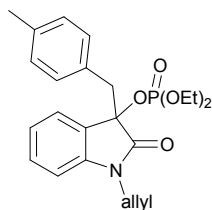

**1-Allyl-3-(4-methylbenzyl)-2-oxoindolin-3-yl diethyl phosphate (7e).** colorless oil (212 mg, 99% yield).  $^1\text{H}$  NMR (400 MHz,  $\text{CDCl}_3$ )  $\delta$  7.34 (d,  $J = 7.2$  Hz, 1H), 7.23 (t,  $J = 7.6$  Hz, 1H), 7.04 (t,  $J = 7.6$  Hz, 1H), 6.89 (d,  $J = 7.6$  Hz, 2H), 6.77 (d,  $J = 8.0$  Hz, 2H), 6.60 (d,  $J = 8.0$  Hz, 1H), 5.51–5.42 (m, 1H), 4.98–4.95 (m, 1H), 4.76–4.72 (m, 1H), 4.30 (dd,  $J = 16.8, 4.8$  Hz, 1H), 4.09–3.84 (m, 5H), 3.46 (d,  $J = 12.8$  Hz, 1H), 3.25 (d,  $J = 12.8$  Hz, 1H), 2.22 (s, 3H), 1.24 (t,  $J = 7.2$  Hz, 3H), 1.21 (t,  $J = 7.2$  Hz, 3H);  $^{13}\text{C}$  NMR (100 MHz,  $\text{CDCl}_3$ )  $\delta$  173.1, 142.8, 136.3, 130.4, 130.2, 130.0, 129.2, 128.2, 125.8, 124.9, 121.8, 116.7, 109.0, 81.6 (d,  $J = 6.7$  Hz), 63.5 (d,  $J = 3.9$  Hz), 63.5 (d,  $J = 4.3$  Hz), 43.2 (d,  $J = 10.2$  Hz), 41.9, 20.7, 15.7 (d,  $J = 5.7$  Hz), 15.6 (d,  $J = 6.8$  Hz); IR  $\nu$  2983, 1725, 1645, 1611, 1487, 1363, 1269, 1016, 838, 808, 759  $\text{cm}^{-1}$ ; HRMS (ESI) calcd. for  $\text{C}_{23}\text{H}_{28}\text{NNaO}_5\text{P}$   $[\text{M} + \text{Na}]^+$  452.1597, found 452.1580.

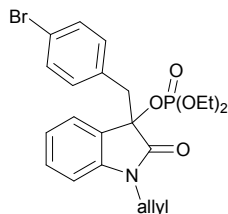

**1-Allyl-3-(4-bromobenzyl)-2-oxoindolin-3-yl diethyl phosphate (7f).** yellow oil (235 mg, 95% yield).  $^1\text{H}$  NMR (400 MHz,  $\text{CDCl}_3$ )  $\delta$  7.35 (d,  $J = 7.2$  Hz, 1H), 7.28–7.25 (m, 1H), 7.22 (d,  $J = 8.0$

Hz, 2H), 7.06 (t,  $J = 7.6$  Hz, 1H), 6.77 (d,  $J = 8.4$  Hz, 2H), 6.63 (d,  $J = 8.0$  Hz, 1H), 5.54–5.45 (m, 1H), 5.05–5.03 (m, 1H), 4.82–4.78 (m, 1H), 4.29 (dd,  $J = 16.4, 5.2$  Hz, 1H), 4.09–3.84 (m, 5H), 3.44 (d,  $J = 12.8$  Hz, 1H), 3.24 (d,  $J = 12.8$  Hz, 1H), 1.25–1.20 (m, 6H);  $^{13}\text{C}$  NMR (100 MHz,  $\text{CDCl}_3$ )  $\delta$  172.7 (d,  $J = 2.1$  Hz), 142.7, 132.0, 131.5, 130.5, 130.2, 130.1, 125.3, 124.7, 121.9, 120.9, 116.9, 109.1, 81.1 (d,  $J = 6.6$  Hz), 63.5 (d,  $J = 5.9$  Hz), 63.5 (d,  $J = 5.6$  Hz), 42.8 (d,  $J = 10.3$  Hz), 41.9, 15.6 (d,  $J = 6.9$  Hz), 15.5 (d,  $J = 6.7$  Hz); IR  $\nu$  2985, 1724, 1643, 1612, 1485, 1440, 1360, 1263, 1030, 980, 814, 763, 730  $\text{cm}^{-1}$ ; HRMS (ESI) calcd. for  $\text{C}_{22}\text{H}_{26}\text{BrNO}_5\text{P}$  [ $\text{M} + \text{H}$ ] $^+$  494.0726, found 494.0737.

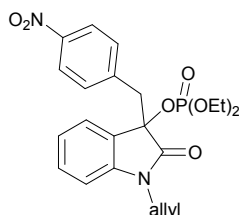

**1-Allyl-3-(4-nitrobenzyl)-2-oxoindolin-3-yl diethyl phosphate (7g).** yellow oil (207 mg, 90% yield).  $^1\text{H}$  NMR (400 MHz,  $\text{CDCl}_3$ )  $\delta$  7.84 (d,  $J = 8.4$  Hz, 2H), 7.26 (d,  $J = 7.2$  Hz, 1H), 7.16 (t,  $J = 7.6$  Hz, 1H), 7.03 (d,  $J = 8.4$  Hz, 2H), 6.97 (t,  $J = 7.6$  Hz, 1H), 6.58 (d,  $J = 8.0$  Hz, 1H), 5.50–5.40 (m, 1H), 4.91–4.89 (m, 1H), 4.82–4.77 (m, 1H), 4.14 (dd,  $J = 16.4, 4.8$  Hz, 1H), 4.02–3.73 (m, 5H), 3.49 (d,  $J = 12.4$  Hz, 1H), 3.29 (d,  $J = 12.8$  Hz, 1H), 1.12 (t,  $J = 7.2$  Hz, 3H), 1.09 (t,  $J = 7.2$  Hz, 3H);  $^{13}\text{C}$  NMR (100 MHz,  $\text{CDCl}_3$ )  $\delta$  172.5 (d,  $J = 2.1$  Hz), 146.7, 142.5, 140.3, 131.3, 130.4, 130.2, 124.9, 124.7, 122.4, 122.1, 117.0, 109.2, 80.7 (d,  $J = 6.4$  Hz), 63.6 (d,  $J = 5.0$  Hz), 63.6 (d,  $J = 5.1$  Hz), 43.1 (d,  $J = 10.4$  Hz), 42.0, 15.5 (d,  $J = 6.9$  Hz), 15.4 (d,  $J = 6.7$  Hz); IR  $\nu$  2984, 1723, 1644, 1612, 1515, 1486, 1441, 1364, 1341, 1276, 1012, 855, 820, 747  $\text{cm}^{-1}$ ; HRMS (ESI) calcd. for  $\text{C}_{22}\text{H}_{26}\text{N}_2\text{O}_7\text{P}$  [ $\text{M} + \text{H}$ ] $^+$  461.1472, found 461.1479.

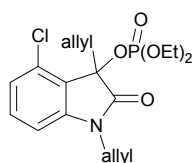

**1,3-Diallyl-4-chloro-2-oxoindolin-3-yl diethyl phosphate (7h).** yellow oil (162 mg, 81% yield).  $^1\text{H}$  NMR (400 MHz,  $\text{CDCl}_3$ )  $\delta$  7.23 (t,  $J = 8.0$  Hz, 1H), 7.00 (d,  $J = 8.0$  Hz, 1H), 6.70 (d,  $J = 8.0$  Hz, 1H), 5.85–5.76 (m, 1H), 5.32–5.20 (m, 3H), 5.12–5.07 (m, 1H), 4.96–4.93 (m, 1H), 4.42 (dd,  $J = 16.4, 5.2$  Hz, 1H), 4.26–3.83 (m, 5H), 3.32 (dd,  $J = 12.8, 7.2$  Hz, 1H), 2.95 (dd,  $J = 12.8, 7.6$  Hz, 1H), 1.32 (t,  $J = 7.2$  Hz, 3H), 1.19 (t,  $J = 7.2$  Hz, 3H);  $^{13}\text{C}$  NMR (100 MHz,  $\text{CDCl}_3$ )  $\delta$  172.7, 145.2, 131.6, 131.4, 130.9, 128.7, 123.5, 122.9, 120.9, 117.7, 108.0, 80.9 (d,  $J = 7.0$  Hz), 63.9 (d,  $J = 5.9$  Hz), 63.9 (d,  $J = 5.5$  Hz), 42.7, 39.0 (d,  $J = 11.4$  Hz), 15.8 (d,  $J = 7.3$  Hz), 15.7 (d,  $J = 7.8$  Hz); IR  $\nu$  2983, 1733, 1643, 1607, 1589, 1478, 1458, 1371, 1266, 1023, 986, 818, 778  $\text{cm}^{-1}$ ; HRMS (ESI) calcd. for  $\text{C}_{18}\text{H}_{23}\text{ClNNaO}_5\text{P}$  [ $\text{M} + \text{Na}$ ] $^+$  422.0900, found 422.0899.

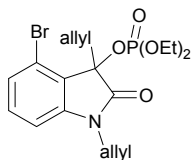

**1,3-Diallyl-4-bromo-2-oxoindolin-3-yl diethyl phosphate (7i).** yellow oil (191 mg, 86% yield).  $^1\text{H}$  NMR (400 MHz,  $\text{CDCl}_3$ )  $\delta$  7.19–7.13 (m, 2H), 6.74 (d,  $J = 7.6$  Hz, 1H), 5.85–5.76 (m, 1H), 5.32–5.19 (m, 3H), 5.13–5.08 (m, 1H), 4.96–4.93 (m, 1H), 4.42 (dd,  $J = 16.4, 5.2$  Hz, 1H), 4.26–4.13 (m, 3H), 4.01–3.86 (m, 2H), 3.41 (dd,  $J = 12.8, 6.8$  Hz, 1H), 2.92 (dd,  $J = 12.8, 7.6$  Hz, 1H), 1.32 (t,  $J = 7.2$  Hz, 3H), 1.20 (t,  $J = 7.2$  Hz, 3H);  $^{13}\text{C}$  NMR (100 MHz,  $\text{CDCl}_3$ )  $\delta$  172.5 (d,  $J = 0.9$  Hz), 145.2, 131.4, 130.6, 128.5, 126.4, 124.4, 120.7, 119.4, 117.5, 108.3, 81.3 (d,  $J = 6.9$  Hz), 63.7 (d,  $J = 6.0$  Hz), 63.6 (d,  $J = 5.7$  Hz), 42.4, 38.6 (d,  $J = 11.3$  Hz), 15.7 (d,  $J = 4.3$  Hz), 15.6 (d,  $J = 4.7$  Hz); IR  $\nu$  2982, 1734, 1643, 1605, 1582, 1476, 1454, 1369, 1266, 1023, 986, 816, 778  $\text{cm}^{-1}$ ; HRMS (ESI) calcd. for  $\text{C}_{18}\text{H}_{23}\text{BrNNaO}_5\text{P}$   $[\text{M} + \text{Na}]^+$  466.0395, found 466.0389.

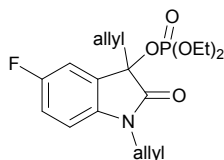

**1,3-Diallyl-5-fluoro-2-oxoindolin-3-yl diethyl phosphate (7j).** white solid (171 mg, 89% yield), m.p. 60–61  $^\circ\text{C}$ .  $^1\text{H}$  NMR (400 MHz,  $\text{CDCl}_3$ )  $\delta$  7.20 (d,  $J = 7.6$  Hz, 1H), 7.04–6.99 (m, 1H), 6.75 (dd,  $J = 8.4, 4.0$  Hz, 1H), 5.86–5.76 (m, 1H), 5.57–5.47 (m, 1H), 5.33–5.22 (m, 2H), 5.11–5.07 (m, 2H), 4.39 (dd,  $J = 16.4, 4.8$  Hz, 1H), 4.26 (dd,  $J = 16.4, 3.6$  Hz, 1H), 4.13–3.87 (m, 4H), 2.91 (dd,  $J = 13.2, 6.4$  Hz, 1H), 2.69 (dd,  $J = 13.2, 8.4$  Hz, 1H), 1.27 (t,  $J = 7.2$  Hz, 3H), 1.23 (t,  $J = 7.2$  Hz, 3H);  $^{13}\text{C}$  NMR (100 MHz,  $\text{CDCl}_3$ )  $\delta$  173.1, 158.5 (d,  $J = 239.9$  Hz), 138.7, 130.7, 128.8, 127.7 (d,  $J = 8.0$  Hz), 120.8, 117.5, 116.2 (d,  $J = 23.4$  Hz), 112.6 (d,  $J = 23.8$  Hz), 109.9 (d,  $J = 7.1$  Hz), 80.1 (d,  $J = 6.5$  Hz), 63.7, 63.6, 42.3, 41.9 (d,  $J = 10.4$  Hz), 15.6, 15.5; IR  $\nu$  2983, 1725, 1646, 1487, 1456, 1360, 1266, 1243, 1024, 881, 818, 778  $\text{cm}^{-1}$ ; HRMS (ESI) calcd. for  $\text{C}_{18}\text{H}_{23}\text{FNNaO}_5\text{P}$   $[\text{M} + \text{Na}]^+$  406.1196, found 406.1201.

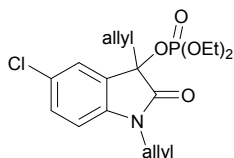

**1,3-Diallyl-5-chloro-2-oxoindolin-3-yl diethyl phosphate (7k).** yellow solid (188 mg, 94% yield), m.p. 49–50  $^\circ\text{C}$ .  $^1\text{H}$  NMR (400 MHz,  $\text{CDCl}_3$ )  $\delta$  7.41 (s, 1H), 7.28 (d,  $J = 7.6$  Hz, 1H), 6.74 (d,  $J = 8.4$  Hz, 1H), 5.85–5.76 (m, 1H), 5.57–5.46 (m, 1H), 5.32–5.21 (m, 2H), 5.12–5.08 (m, 2H), 4.38 (dd,  $J = 16.4, 5.2$  Hz, 1H), 4.25 (dd,  $J = 16.4, 5.2$  Hz, 1H), 4.14–3.84 (m, 4H), 2.90 (dd,  $J = 13.2, 6.4$  Hz, 1H), 2.69 (dd,  $J = 13.2, 8.4$  Hz, 1H), 1.28 (t,  $J = 7.2$  Hz, 3H), 1.23 (t,  $J = 7.2$  Hz, 3H);  $^{13}\text{C}$  NMR (100 MHz,  $\text{CDCl}_3$ )  $\delta$  173.1 (d,  $J = 0.9$  Hz), 141.5, 130.7, 130.0, 128.9, 128.0, 127.6, 125.1, 121.2, 117.8, 110.5, 80.1 (d,  $J = 6.6$  Hz), 63.9, 63.8, 42.6, 42.0 (d,  $J = 10.7$  Hz), 15.8, 15.8; IR  $\nu$  2984, 1724, 1644, 1613, 1483, 1371, 1263, 1100, 1025, 884, 826, 777  $\text{cm}^{-1}$ ; HRMS (ESI)

calcd. for  $C_{18}H_{23}ClNNaO_5P$   $[M + Na]^+$  422.0900, found 422.0901.

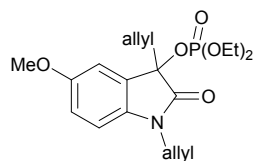

**1,3-Diallyl-5-methoxy-2-oxoindolin-3-yl diethyl phosphate (7l).** yellow oil (105 mg, 53% yield).  $^1H$  NMR (400 MHz,  $CDCl_3$ )  $\delta$  7.01 (d,  $J = 2.8$  Hz, 1H), 6.77–6.74 (m, 1H), 6.65 (d,  $J = 8.4$  Hz, 1H), 5.79–5.70 (m, 1H), 5.50–5.39 (m, 1H), 5.25–5.12 (m, 2H), 5.03–4.98 (m, 2H), 4.31 (dd,  $J = 16.4, 5.2$  Hz, 1H), 4.16 (dd,  $J = 16.4, 5.2$  Hz, 1H), 4.02–3.80 (m, 4H), 3.72 (s, 3H), 2.85 (dd,  $J = 13.2, 6.4$  Hz, 1H), 2.64 (dd,  $J = 13.2, 8.0$  Hz, 1H), 1.18–1.14 (m, 6H);  $^{13}C$  NMR (100 MHz,  $CDCl_3$ )  $\delta$  173.3 (d,  $J = 2.0$  Hz), 155.8, 136.4, 131.4, 129.5, 127.8, 120.9, 117.7, 114.7, 112.2, 109.9, 81.0 (d,  $J = 6.9$  Hz), 64.0, 63.9, 55.9, 42.7, 42.3 (d,  $J = 10.0$  Hz), 16.0 (d,  $J = 4.2$  Hz), 15.9 (d,  $J = 4.7$  Hz); IR  $\nu$  2983, 1725, 1642, 1603, 1493, 1363, 1271, 1023, 1005, 809, 778  $cm^{-1}$ ; HRMS (ESI) calcd. for  $C_{19}H_{26}NNaO_6P$   $[M + Na]^+$  418.1395, found 418.1400.

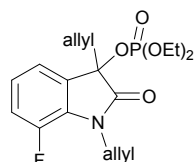

**1,3-Diallyl-7-fluoro-2-oxoindolin-3-yl diethyl phosphate (7m).** yellow oil (144 mg, 75% yield).  $^1H$  NMR (400 MHz,  $CDCl_3$ )  $\delta$  7.29–7.25 (m, 1H), 7.09–6.99 (m, 2H), 5.96–5.86 (m, 1H), 5.54–5.44 (m, 1H), 5.34–5.30 (m, 1H), 5.19–5.17 (m, 1H), 5.08–5.04 (m, 2H), 4.51–4.40 (m, 2H), 4.10–3.85 (m, 4H), 2.90 (dd,  $J = 13.2, 6.4$  Hz, 1H), 2.72 (dd,  $J = 13.2, 8.4$  Hz, 1H), 1.26–1.21 (m, 6H);  $^{13}C$  NMR (100 MHz,  $CDCl_3$ )  $\delta$  173.2 (d,  $J = 1.4$  Hz), 147.2 (d,  $J = 243.6$  Hz), 132.0, 129.5 (d,  $J = 15.2$  Hz), 129.5 (d,  $J = 3.2$  Hz), 129.0, 123.1 (d,  $J = 6.1$  Hz), 121.1, 120.6, 118.3 (d,  $J = 19.5$  Hz), 117.2, 80.4 (d,  $J = 4.7$  Hz), 63.9, 63.8, 44.1 (d,  $J = 4.8$  Hz), 42.4 (d,  $J = 10.1$  Hz), 15.8 (d,  $J = 6.9$  Hz), 15.7 (d,  $J = 6.6$  Hz); IR  $\nu$  2984, 1736, 1631, 1600, 1488, 1267, 1249, 1021, 812, 762  $cm^{-1}$ ; HRMS (ESI) calcd. for  $C_{18}H_{23}FNNaO_5P$   $[M + Na]^+$  406.1196, found 406.1195.

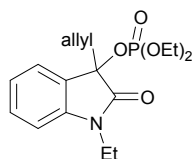

**3-Allyl-1-ethyl-2-oxoindolin-3-yl diethyl phosphate (7n).** yellow solid (159 mg, 90% yield), m.p. 48.5–49.5  $^{\circ}C$ .  $^1H$  NMR (400 MHz,  $CDCl_3$ )  $\delta$  7.46 (d,  $J = 7.2$  Hz, 1H), 7.33 (t,  $J = 8.0$  Hz, 1H), 7.06 (t,  $J = 7.6$  Hz, 1H), 6.83 (d,  $J = 8.0$  Hz, 1H), 5.53–5.43 (m, 1H), 5.07–5.01 (m, 2H), 4.05–3.66 (m, 6H), 2.91 (dd,  $J = 13.2, 6.4$  Hz, 1H), 2.70 (dd,  $J = 13.2, 8.4$  Hz, 1H), 1.28–1.18 (m, 9H);  $^{13}C$  NMR (100 MHz,  $CDCl_3$ )  $\delta$  173.2 (d,  $J = 1.9$  Hz), 142.8, 130.3, 129.4, 126.6, 125.1, 122.1, 120.6, 108.4, 80.5 (d,  $J = 6.9$  Hz), 63.8 (d,  $J = 5.5$  Hz), 63.7 (d,  $J = 6.4$  Hz), 42.1 (d,  $J = 9.9$  Hz), 34.7, 15.9 (d,  $J = 6.8$  Hz), 15.8 (d,  $J = 6.6$  Hz), 12.2; IR  $\nu$  2979, 1723, 1640, 1613, 1490, 1366, 1261, 1006, 797, 757  $cm^{-1}$ ; HRMS (ESI) calcd. for  $C_{17}H_{25}NO_5P$   $[M + H]^+$  354.1465, found

354.1466.

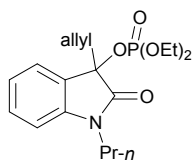

**3-Allyl-2-oxo-1-propylindolin-3-yl diethyl phosphate (7o).** yellow oil (171 mg, 93% yield).  $^1\text{H}$  NMR (400 MHz,  $\text{CDCl}_3$ )  $\delta$  7.46 (d,  $J = 7.2$  Hz, 1H), 7.33 (t,  $J = 7.6$  Hz, 1H), 7.06 (t,  $J = 7.6$  Hz, 1H), 6.83 (d,  $J = 8.0$  Hz, 1H), 5.55–5.45 (m, 1H), 5.08–5.03 (m, 2H), 4.03–3.54 (m, 6H), 2.93 (dd,  $J = 13.2, 6.0$  Hz, 1H), 2.70 (dd,  $J = 13.2, 8.4$  Hz, 1H), 1.72–1.67 (m, 2H), 1.24–1.19 (m, 6H), 0.97 (t,  $J = 7.2$  Hz, 3H);  $^{13}\text{C}$  NMR (100 MHz,  $\text{CDCl}_3$ )  $\delta$  173.0 (d,  $J = 2.1$  Hz), 142.8, 129.8, 128.9, 125.9, 124.4, 121.5, 119.9, 108.1, 79.9 (d,  $J = 6.7$  Hz), 63.1 (d,  $J = 5.8$  Hz), 63.0 (d,  $J = 5.3$  Hz), 41.6 (d,  $J = 10.0$  Hz), 41.2, 20.0, 15.3 (d,  $J = 7.1$  Hz), 15.2 (d,  $J = 6.9$  Hz), 10.8; IR  $\nu$  2978, 1727, 1641, 1613, 1489, 1367, 1268, 1023, 817, 751  $\text{cm}^{-1}$ ; HRMS (ESI) calcd. for  $\text{C}_{18}\text{H}_{26}\text{NNaO}_5\text{P}$  [ $\text{M} + \text{Na}$ ] $^+$  390.1446, found 390.1440.

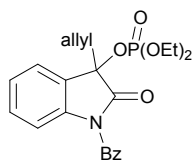

**3-Allyl-1-benzyl-2-oxoindolin-3-yl diethyl phosphate (7p).** yellow oil (147 mg, 71% yield).  $^1\text{H}$  NMR (400 MHz,  $\text{CDCl}_3$ )  $\delta$  7.48 (d,  $J = 7.2$  Hz, 1H), 7.36–7.19 (m, 6H), 7.04 (t,  $J = 7.6$  Hz, 1H), 6.67 (d,  $J = 7.6$  Hz, 1H), 5.56–5.45 (m, 1H), 5.12–5.04 (m, 3H), 4.76 (d,  $J = 15.6$  Hz, 1H), 4.05–3.86 (m, 4H), 2.98 (dd,  $J = 13.2, 6.0$  Hz, 1H), 2.78 (dd,  $J = 13.2, 8.4$  Hz, 1H), 1.22 (t,  $J = 7.2$  Hz, 3H), 1.18 (t,  $J = 7.2$  Hz, 3H);  $^{13}\text{C}$  NMR (100 MHz,  $\text{CDCl}_3$ )  $\delta$  173.6 (d,  $J = 2.1$  Hz), 142.7, 135.3, 130.1, 129.3, 128.4, 127.3, 127.2, 126.2, 124.8, 122.3, 120.7, 109.3, 80.5 (d,  $J = 6.9$  Hz), 63.6 (d,  $J = 6.4$  Hz), 63.6 (d,  $J = 5.8$  Hz), 43.9, 42.1 (d,  $J = 10.1$  Hz), 15.7 (d,  $J = 6.7$  Hz), 15.6 (d,  $J = 6.6$  Hz); IR  $\nu$  2982, 1729, 1641, 1613, 1488, 1455, 1364, 1267, 1017, 818, 751, 735, 697  $\text{cm}^{-1}$ ; HRMS (ESI) calcd. for  $\text{C}_{22}\text{H}_{26}\text{NNaO}_5\text{P}$  [ $\text{M} + \text{Na}$ ] $^+$  438.1441, found 438.1452.

# Copies of $^1\text{H}$ NMR and $^{13}\text{C}$ NMR Spectra

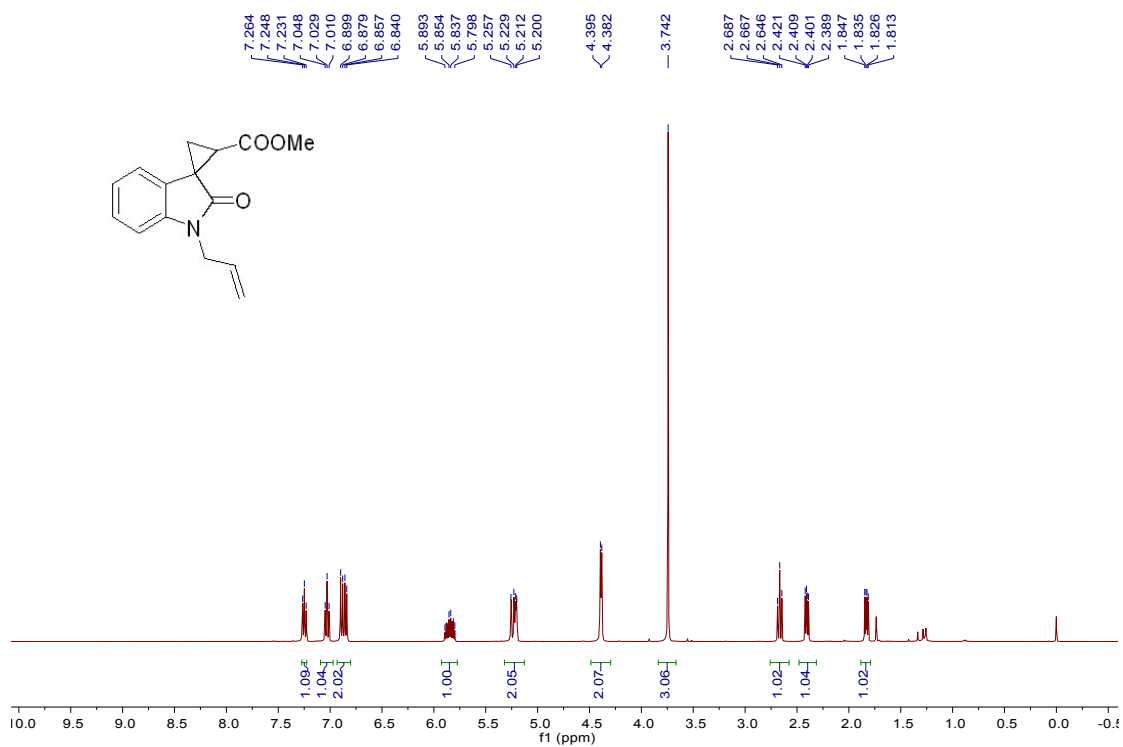

$^1\text{H}$  NMR spectrum of **4a**

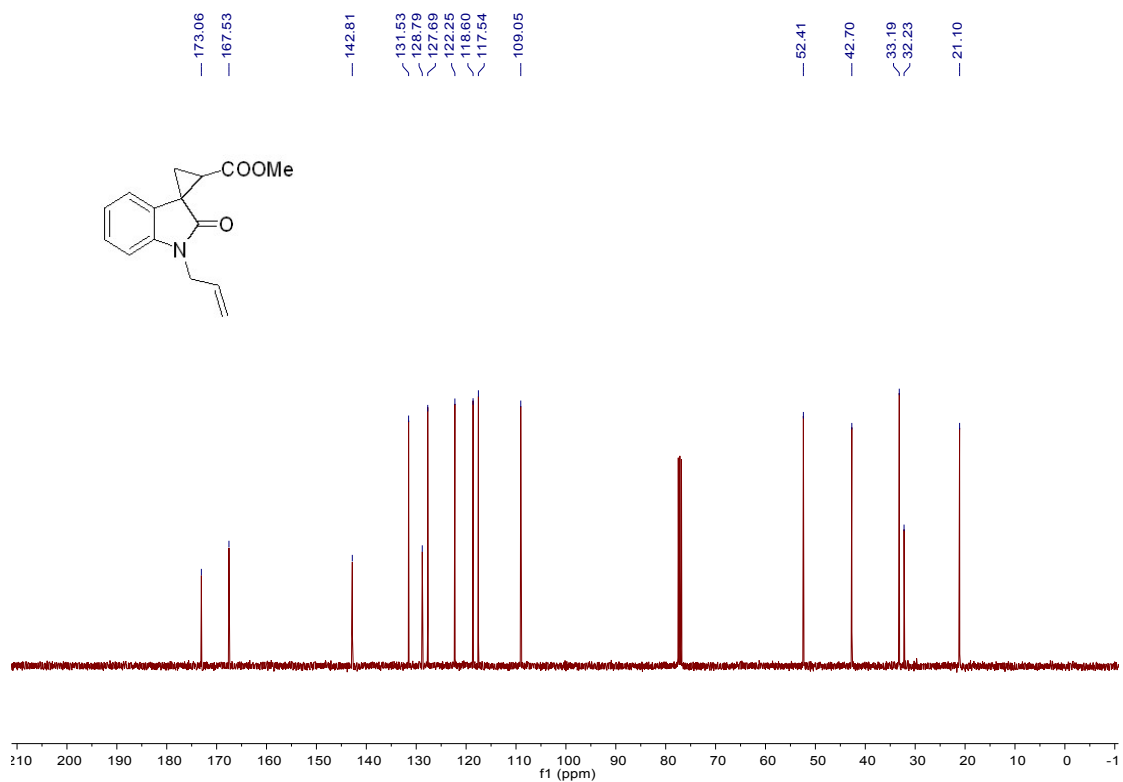

$^{13}\text{C}$  NMR spectrum of **4a**

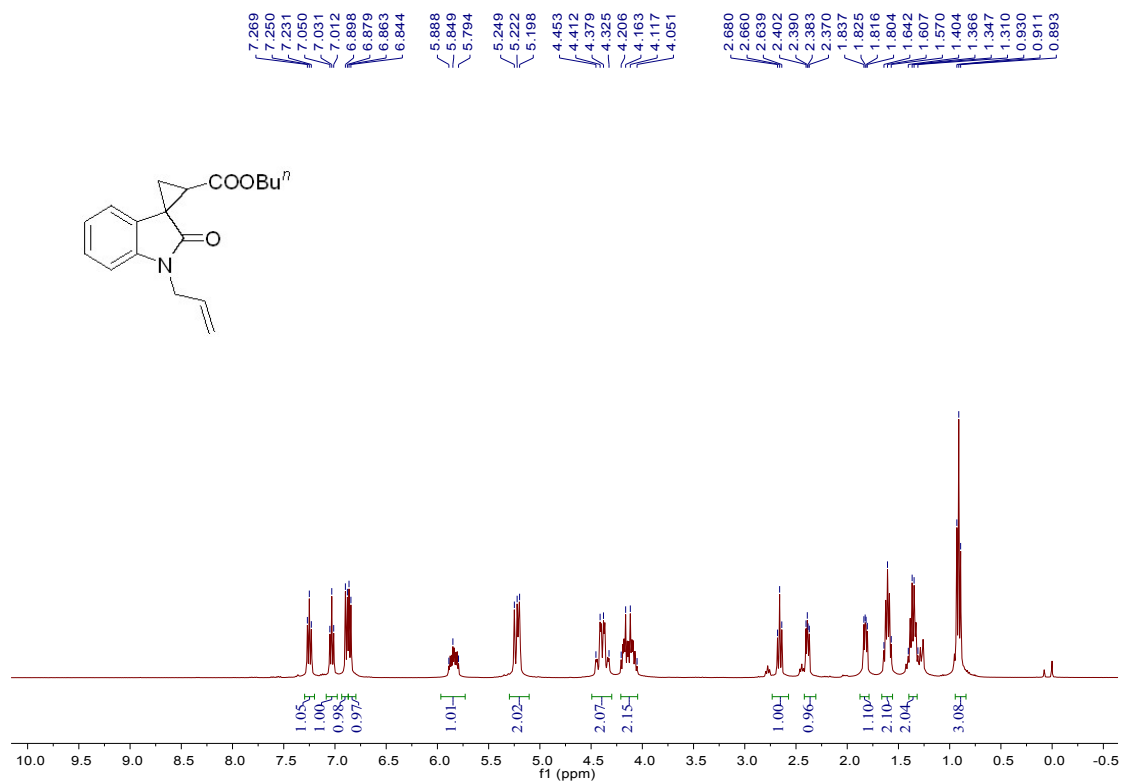

<sup>1</sup>H NMR spectrum of **4b**

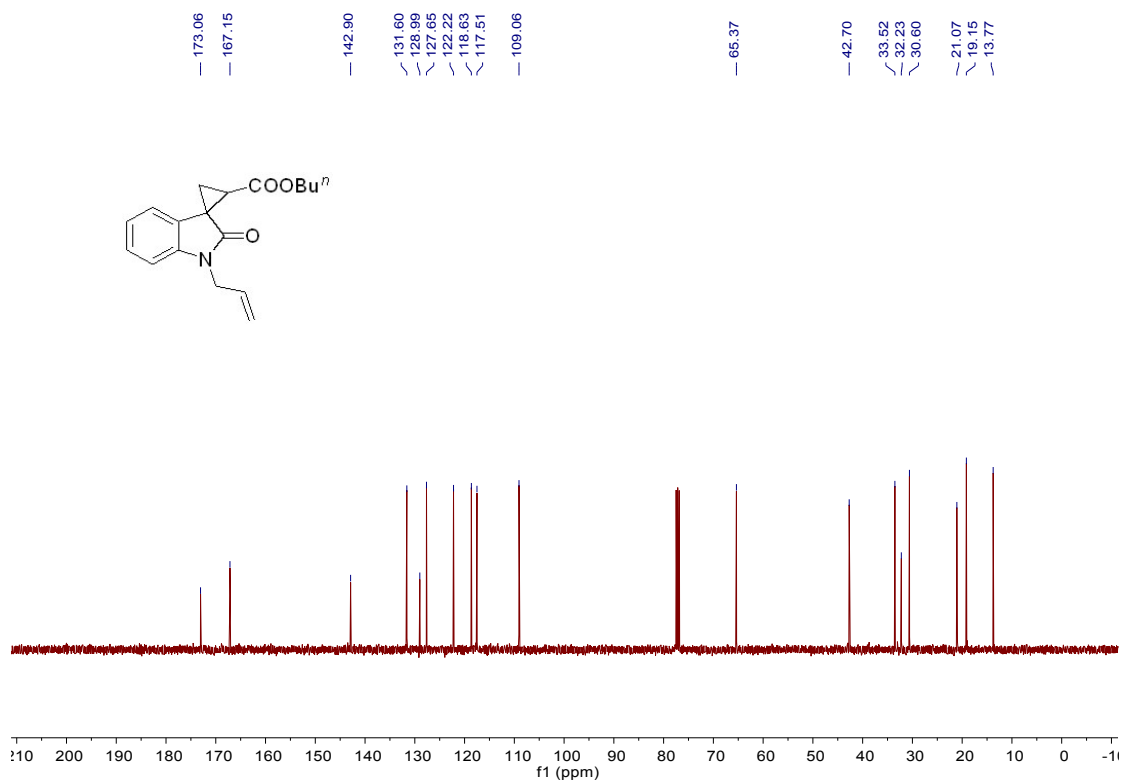

<sup>13</sup>C NMR spectrum of **4b**



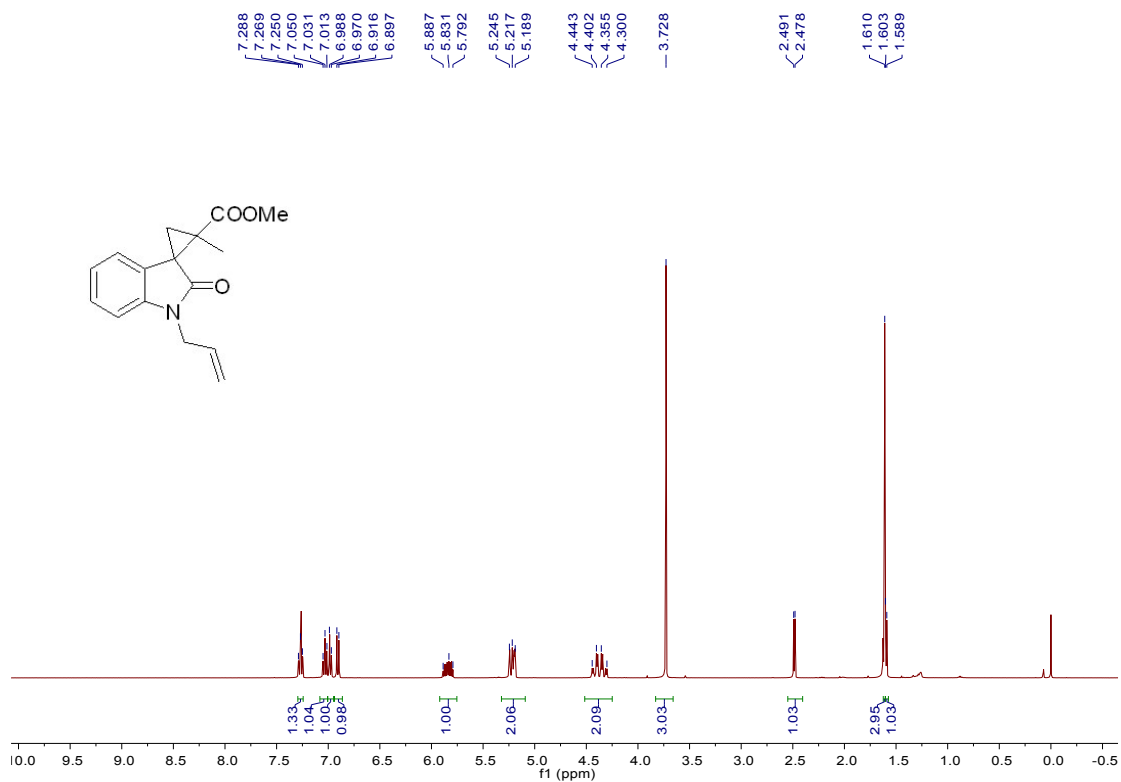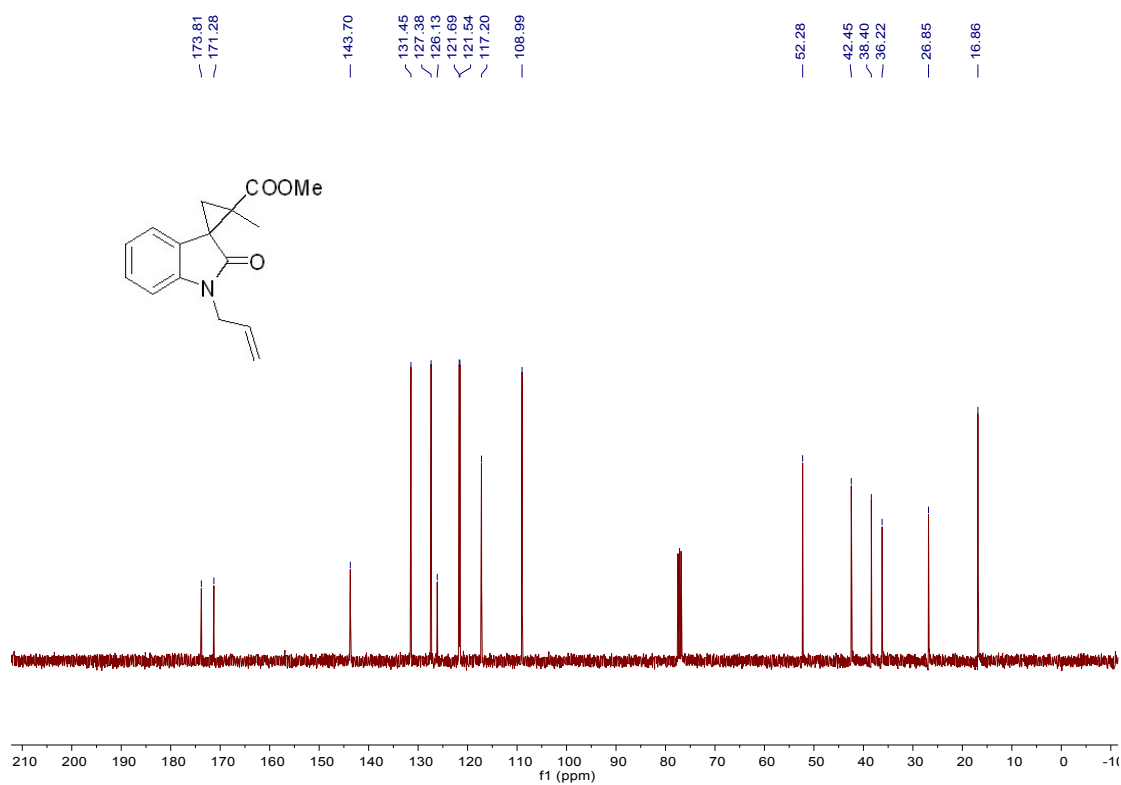

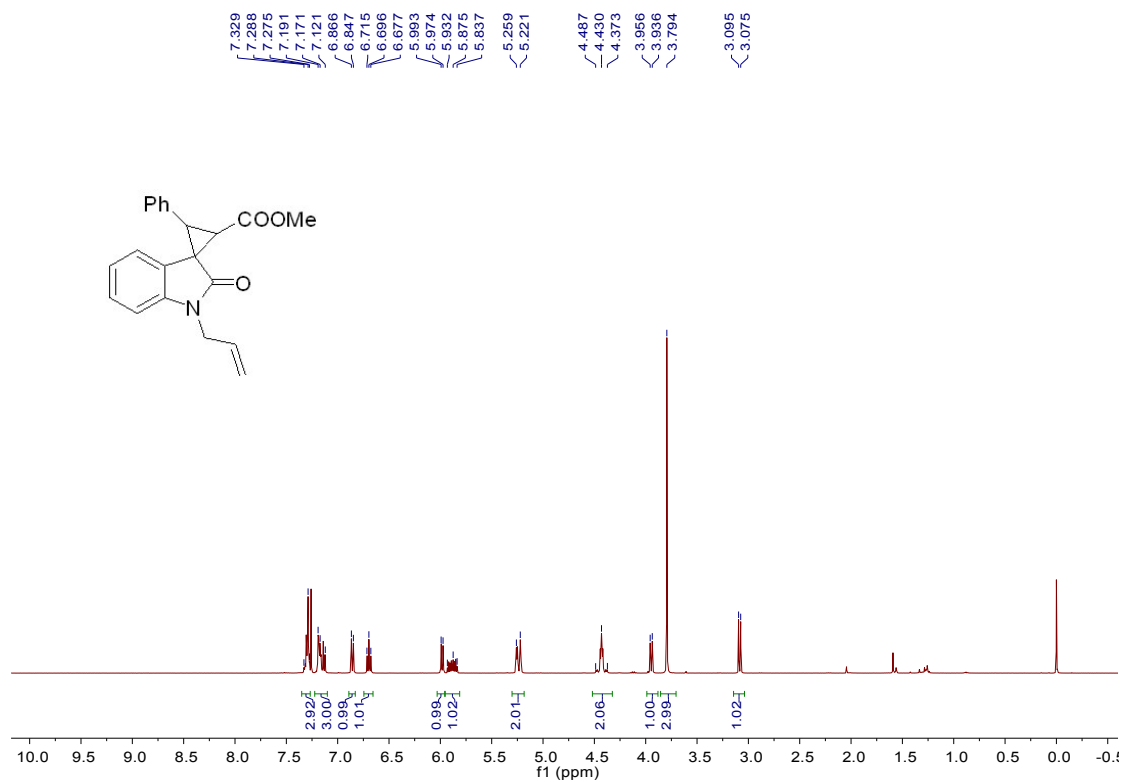

<sup>1</sup>H NMR spectrum of 4d

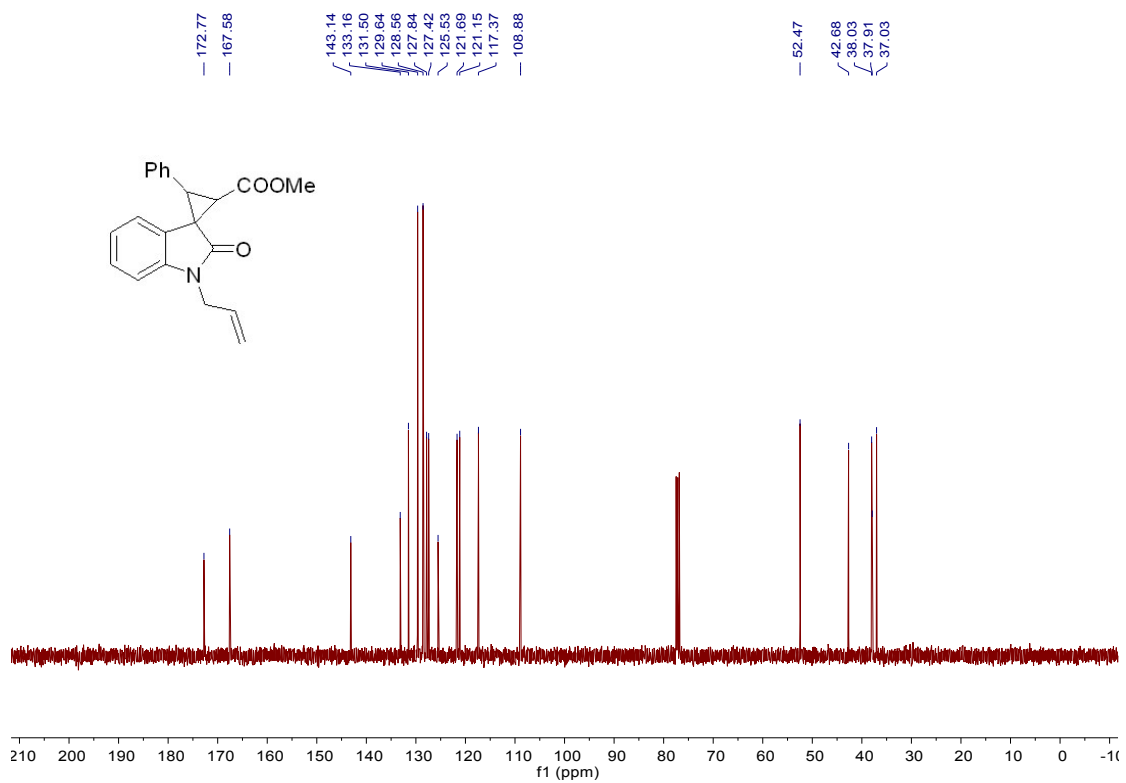

<sup>13</sup>C NMR spectrum of 4d

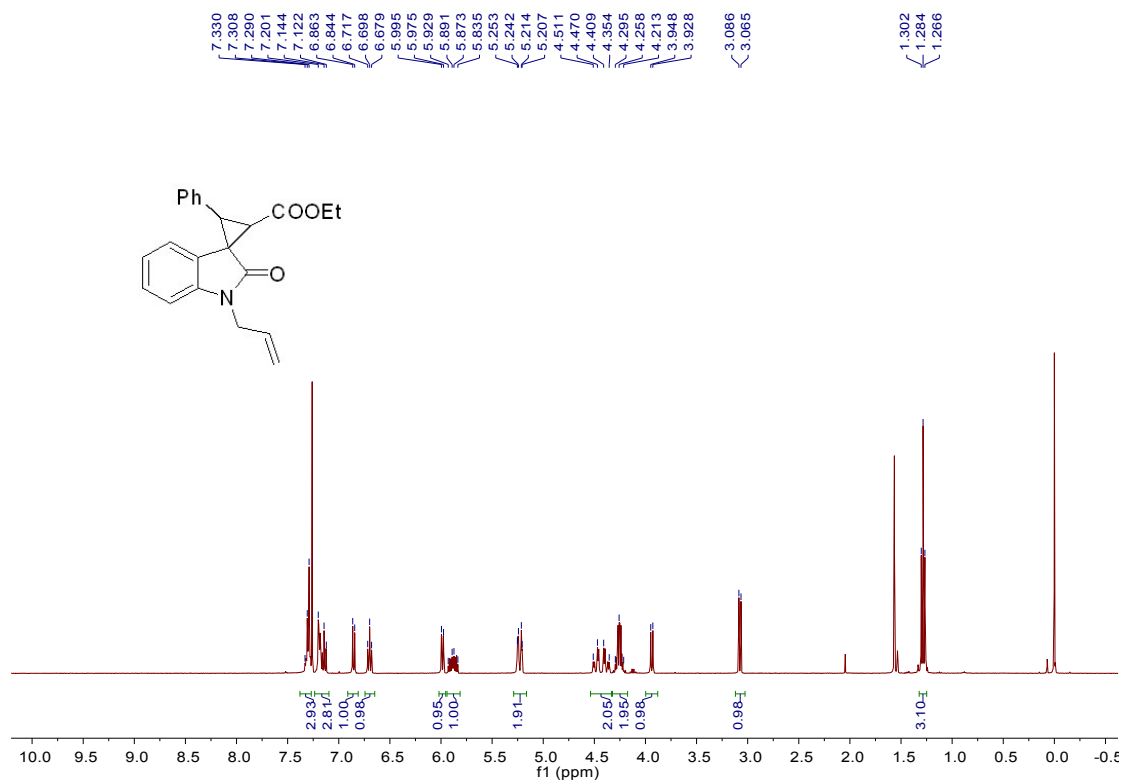

<sup>1</sup>H NMR spectrum of 4e

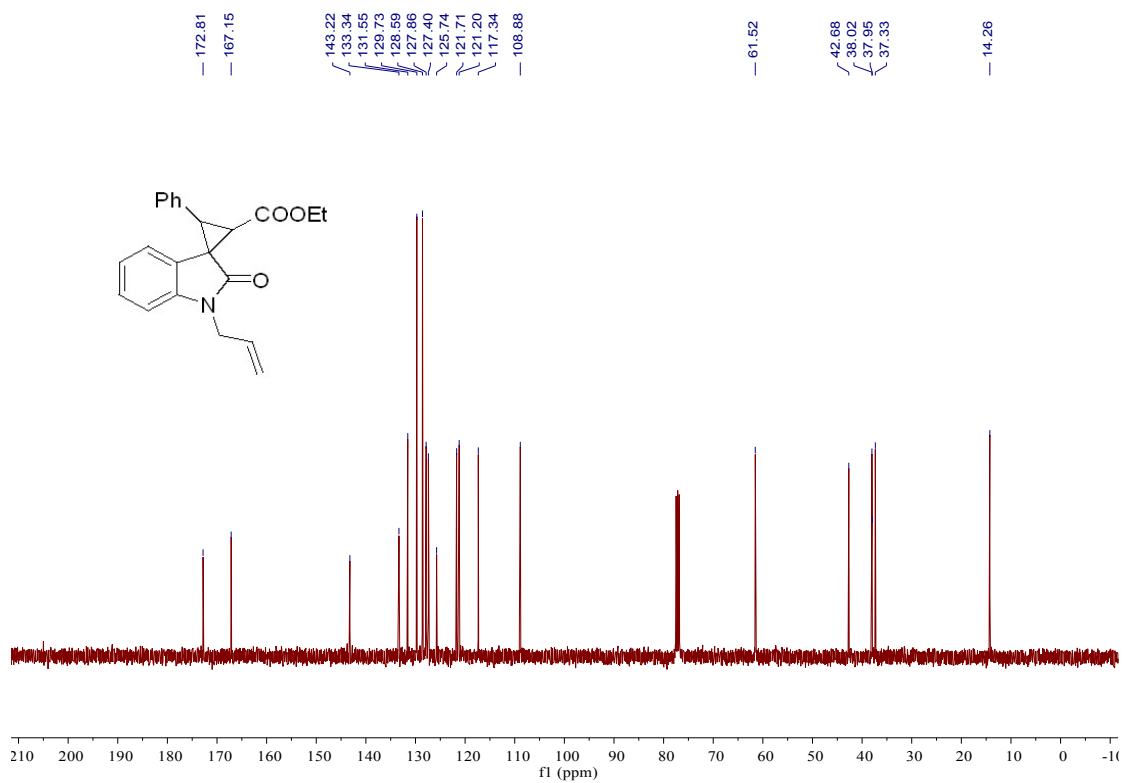

<sup>13</sup>C NMR spectrum of 4e

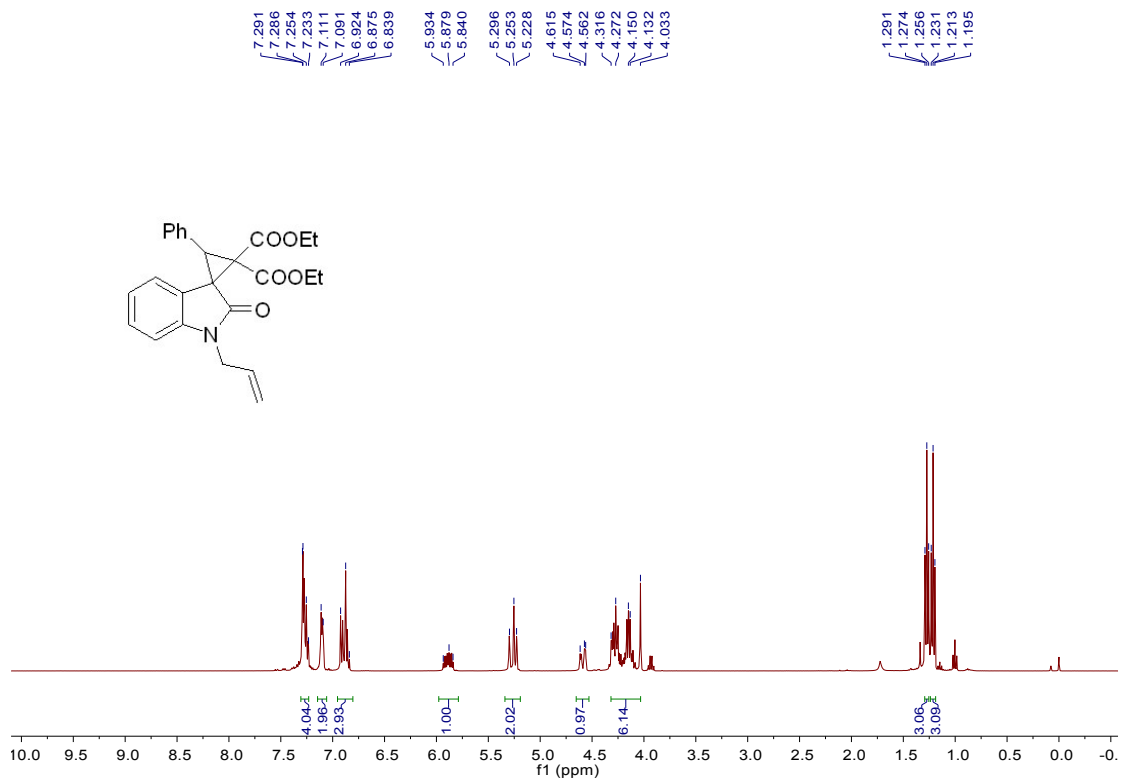

<sup>1</sup>H NMR spectrum of **4f**

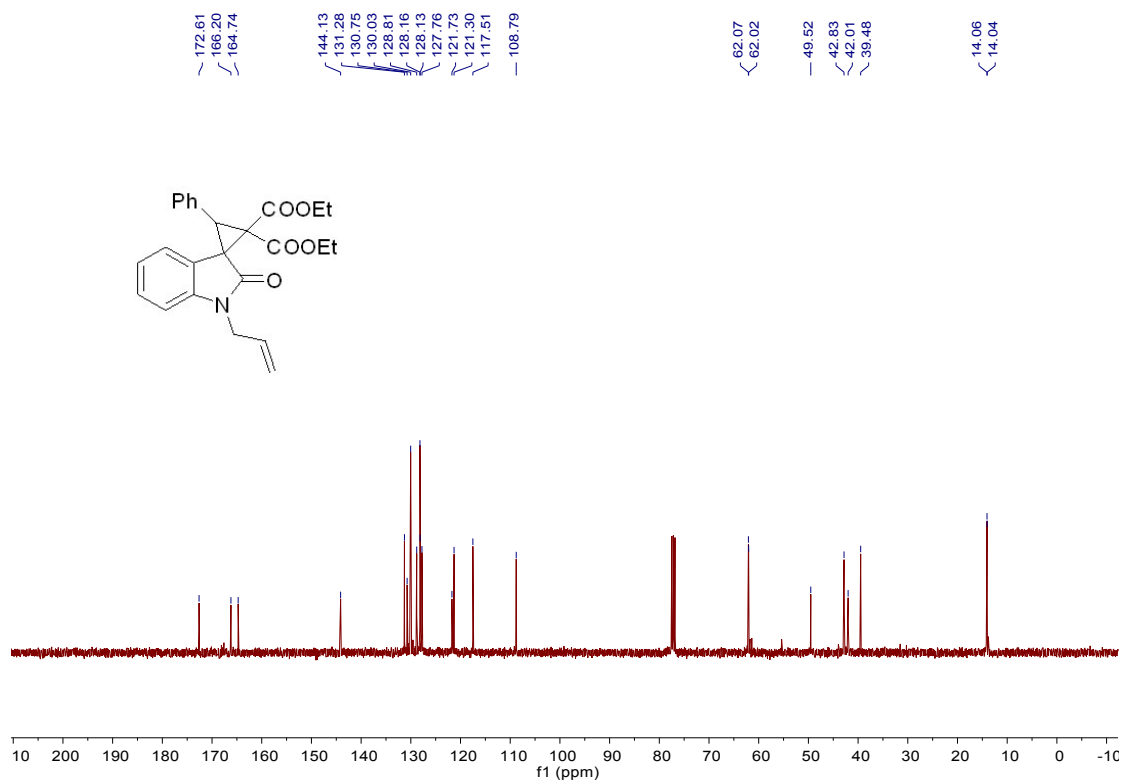

<sup>13</sup>C NMR spectrum of **4f**

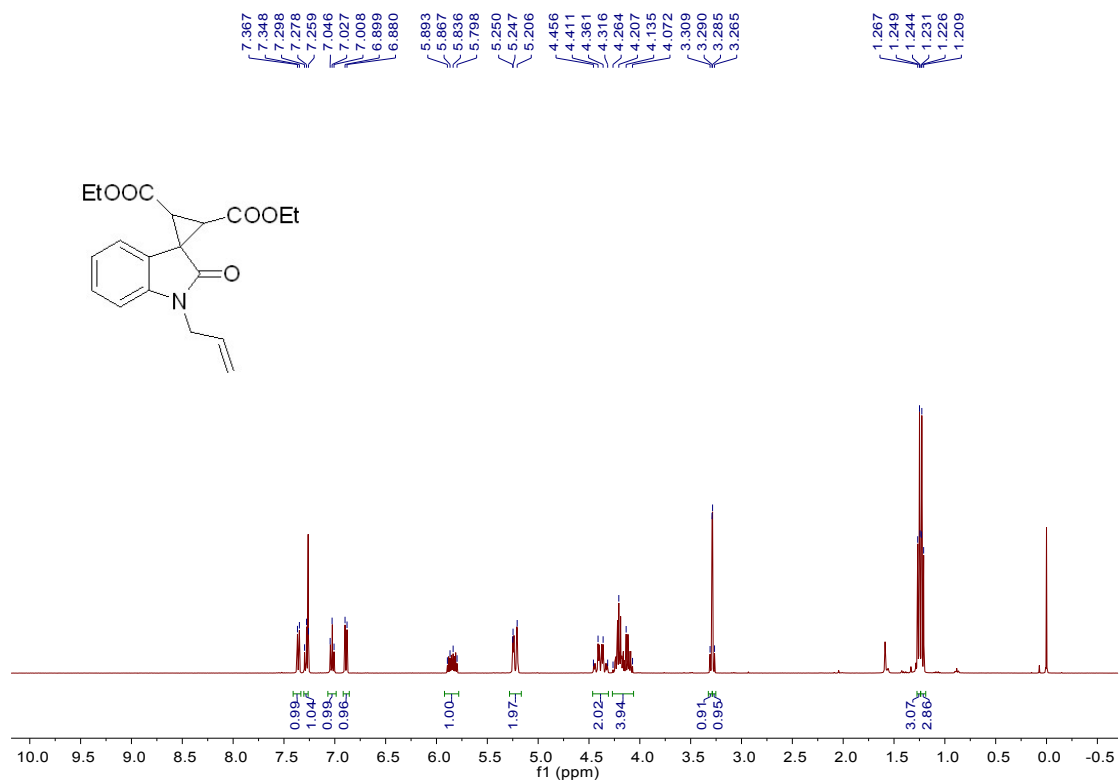

$^1\text{H}$  NMR spectrum of **4g**

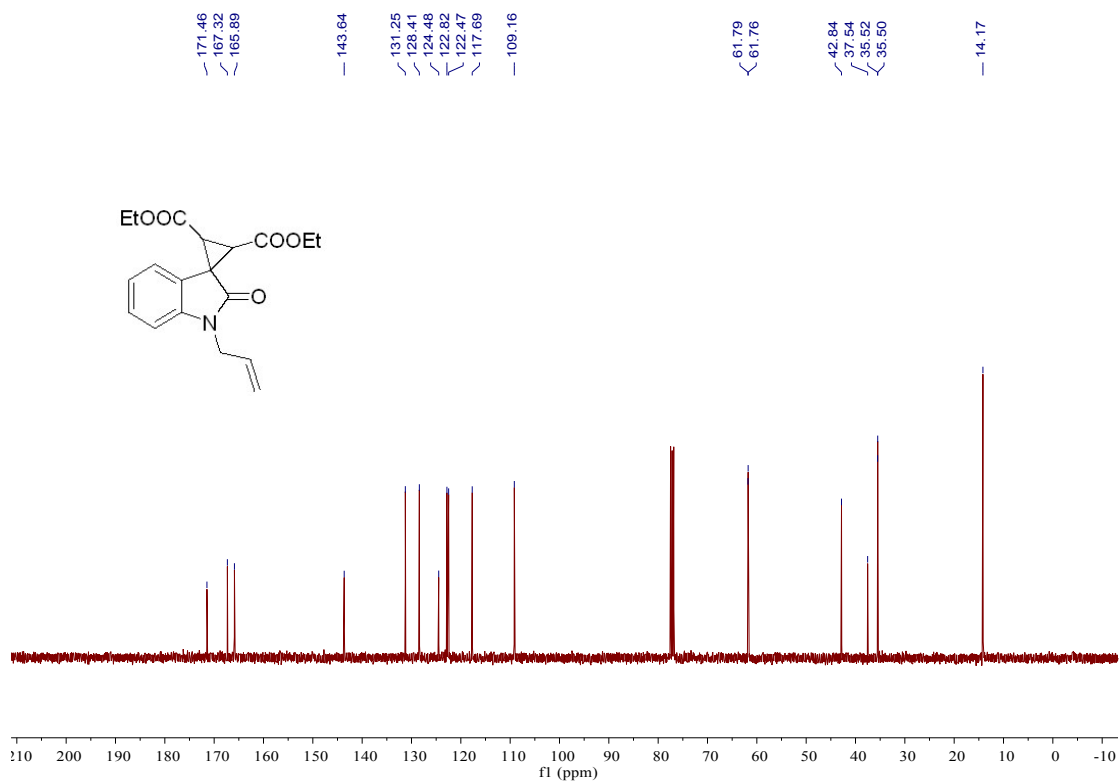

$^{13}\text{C}$  NMR spectrum of **4g**

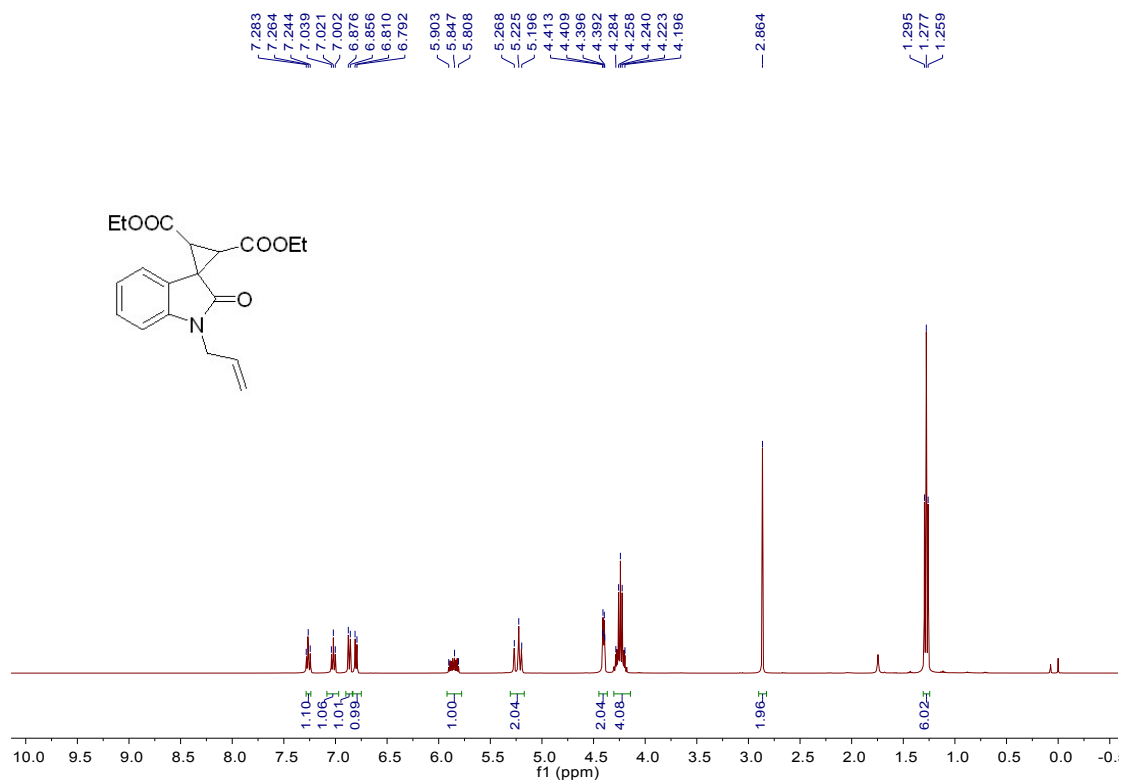

<sup>1</sup>H NMR spectrum of **4g'**

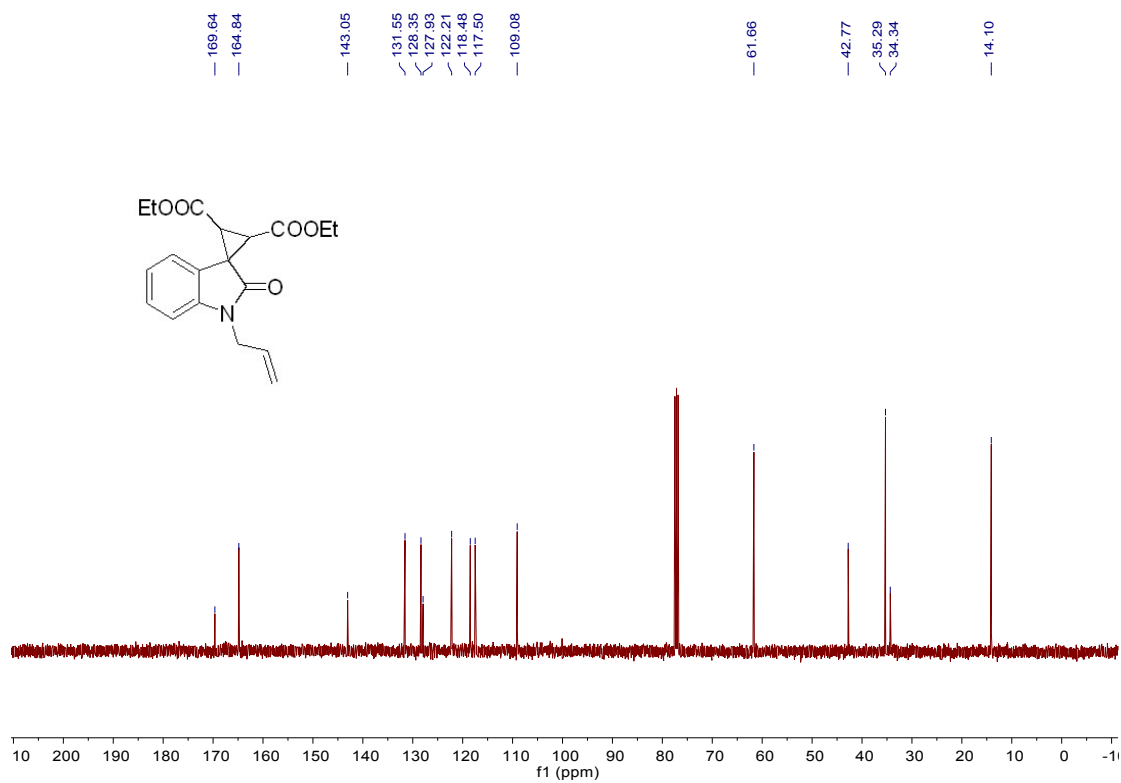

<sup>13</sup>C NMR spectrum of **4g'**

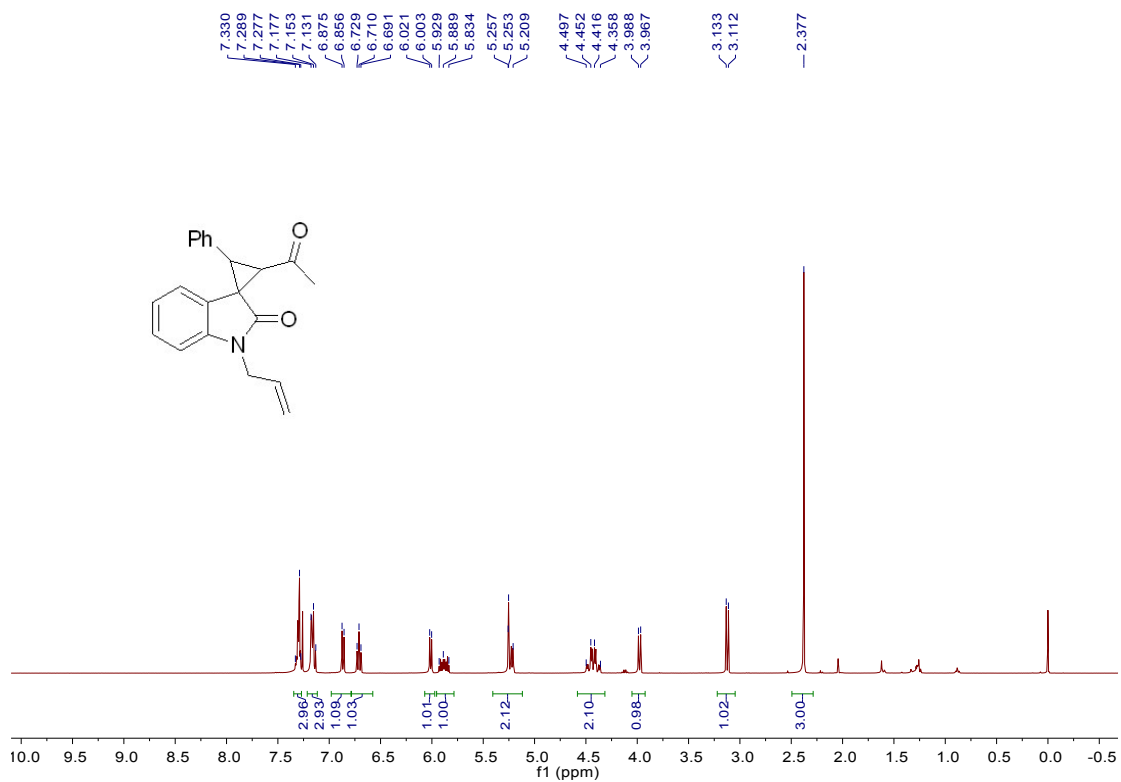

<sup>1</sup>H NMR spectrum of **4h**

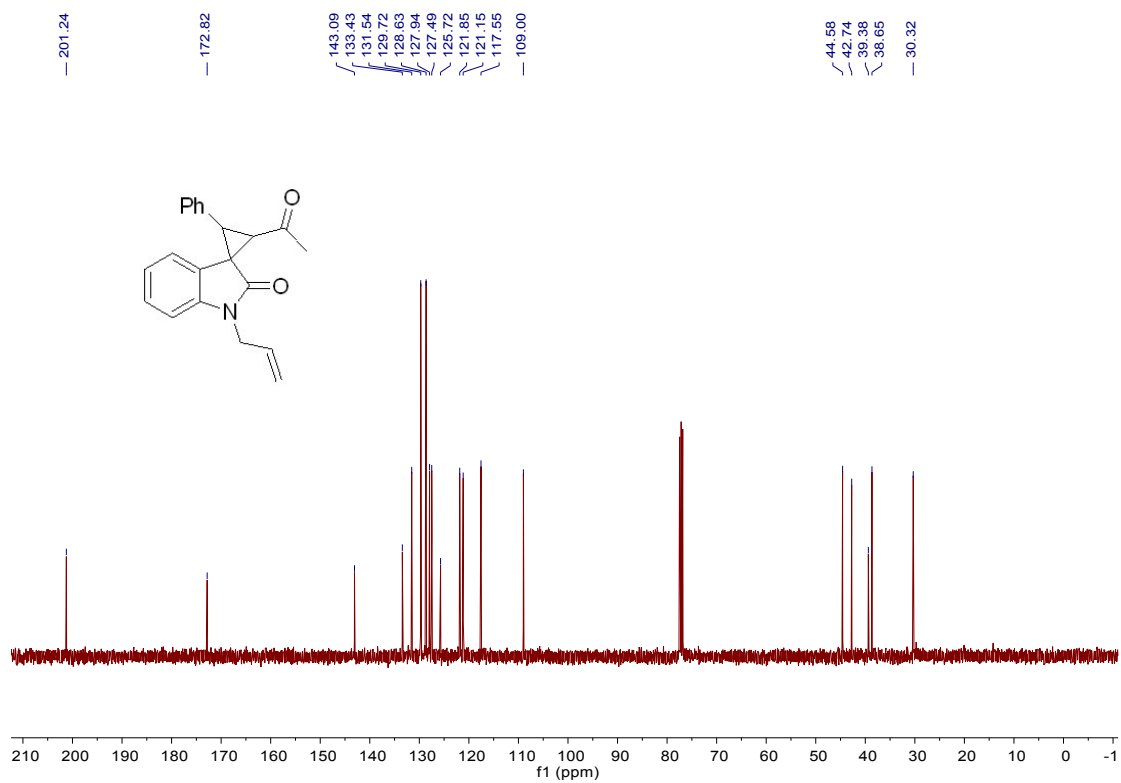

<sup>13</sup>C NMR spectrum of **4h**

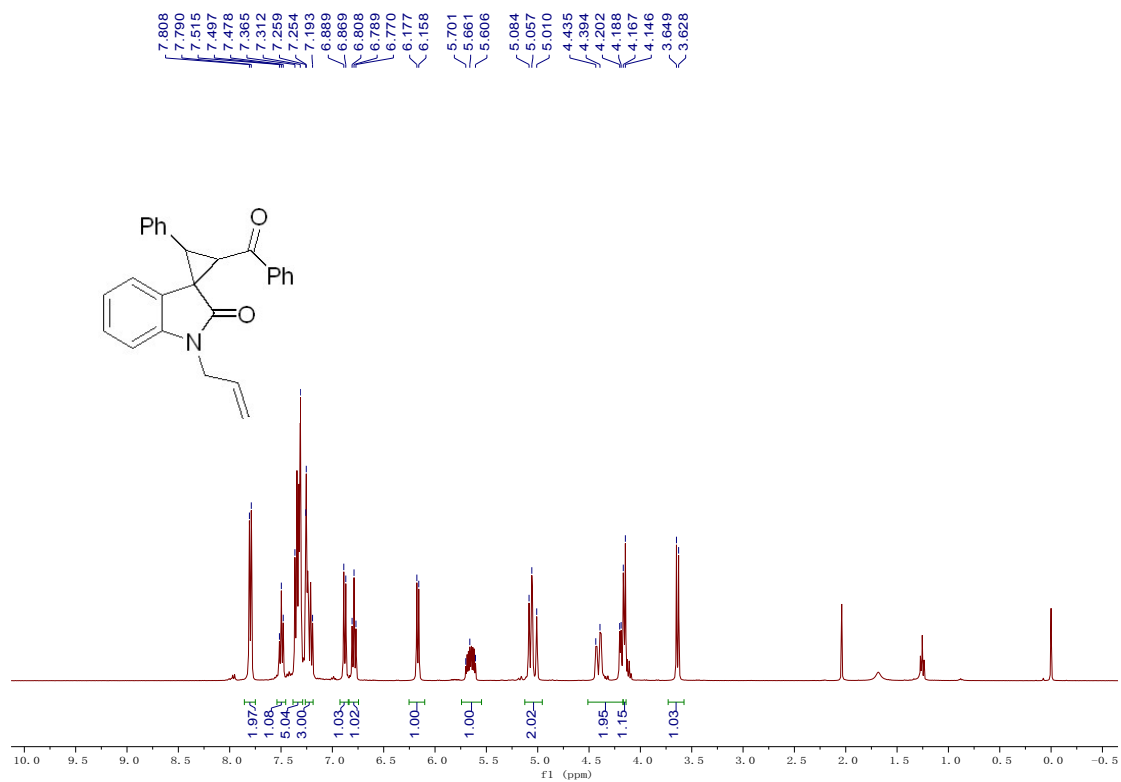

<sup>1</sup>H NMR spectrum of **4i**

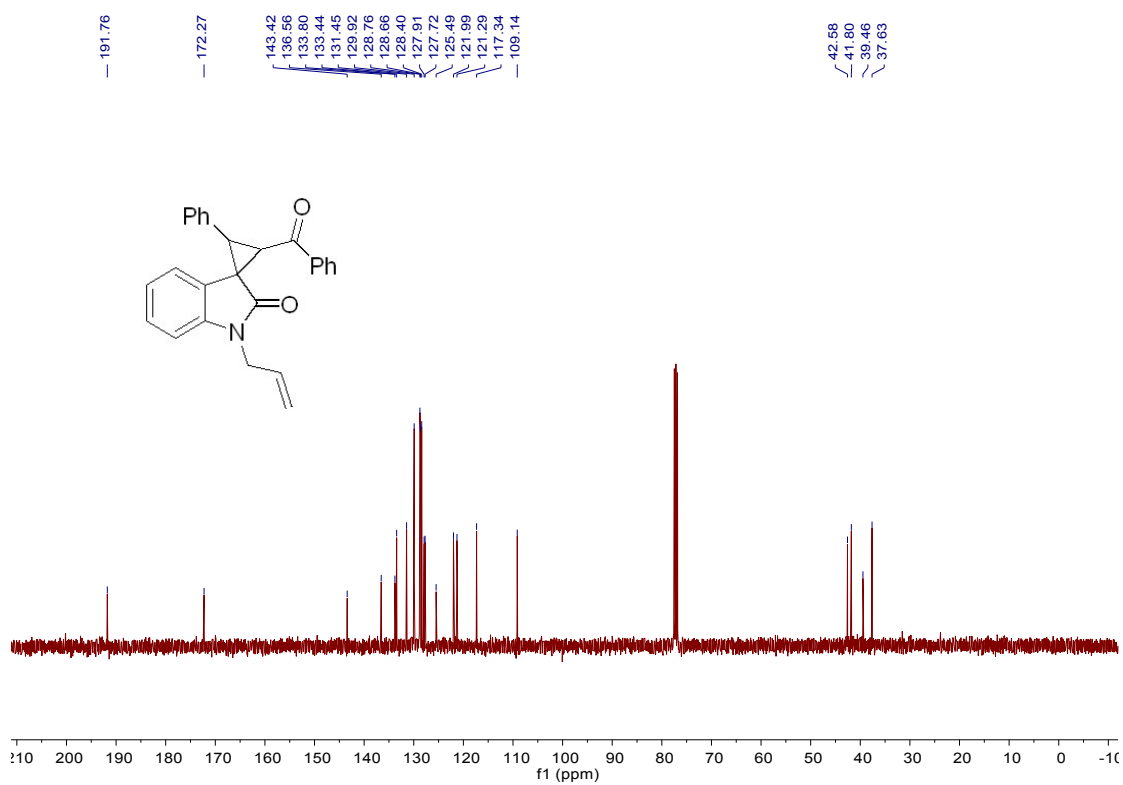

<sup>13</sup>C NMR spectrum of **4i**



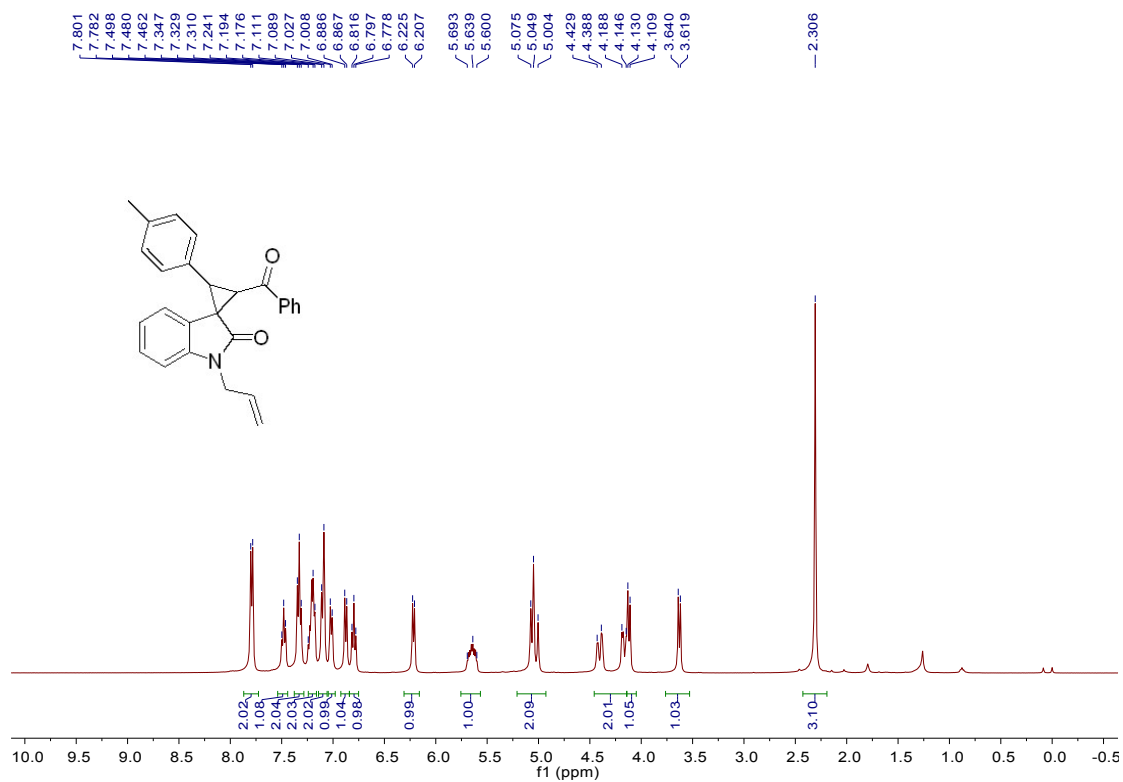

<sup>1</sup>H NMR spectrum of **4j**

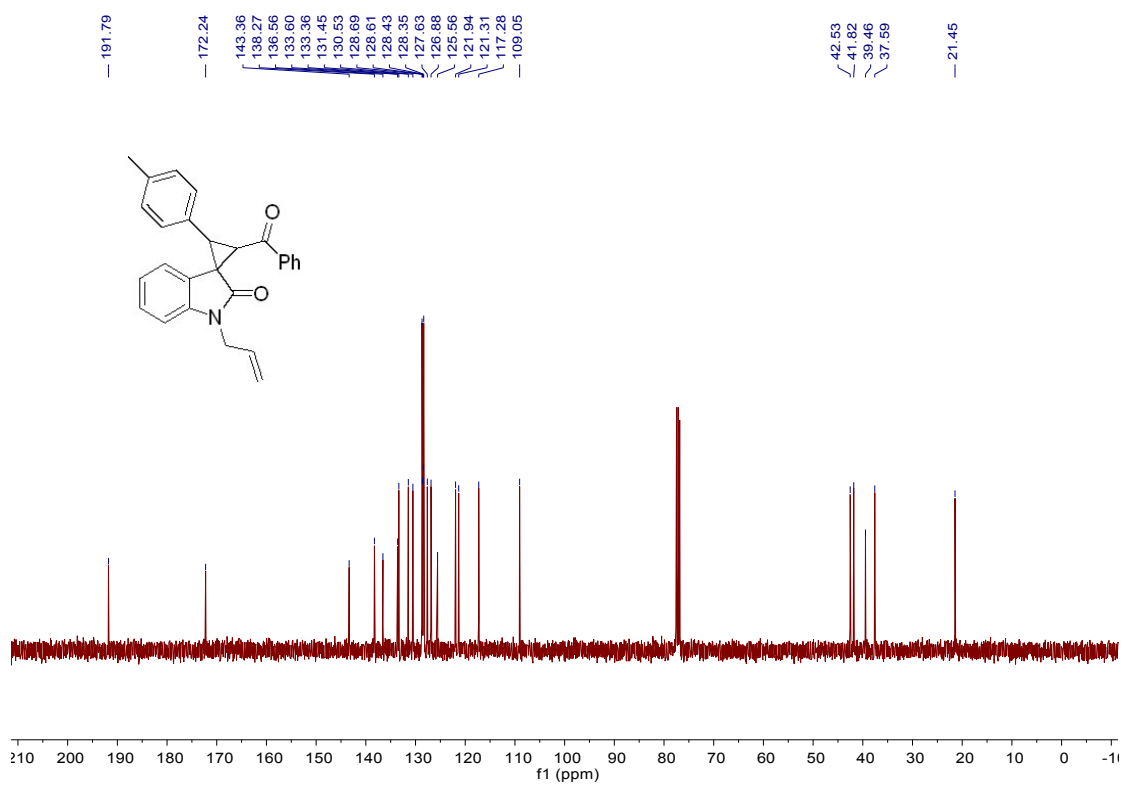

<sup>13</sup>C NMR spectrum of **4j**

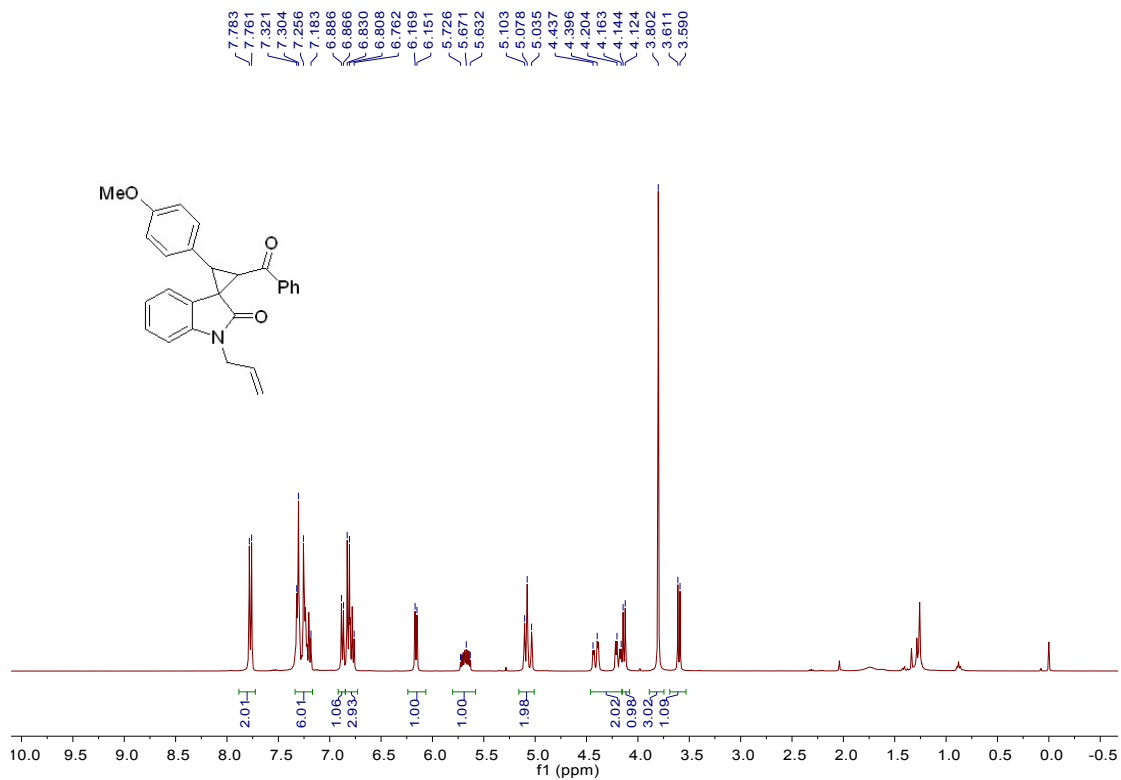

<sup>1</sup>H NMR spectrum of 4k

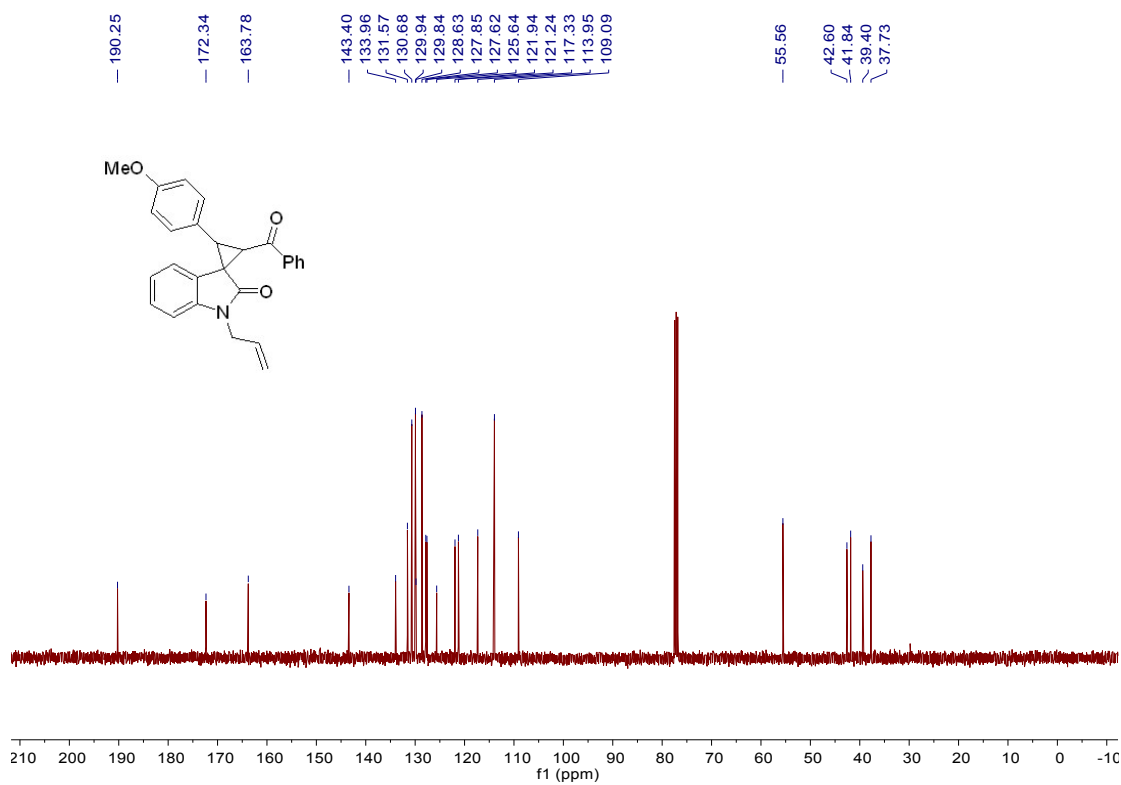

<sup>13</sup>C NMR spectrum of 4k

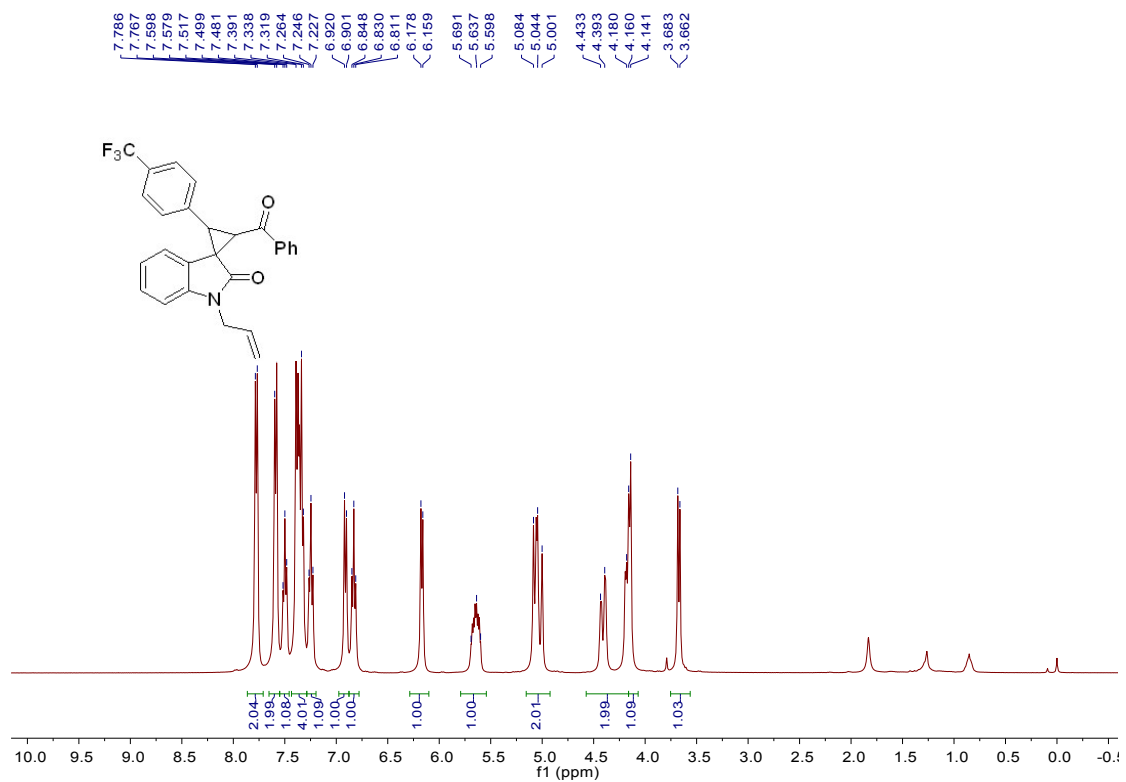

**<sup>1</sup>H NMR spectrum of 4I**

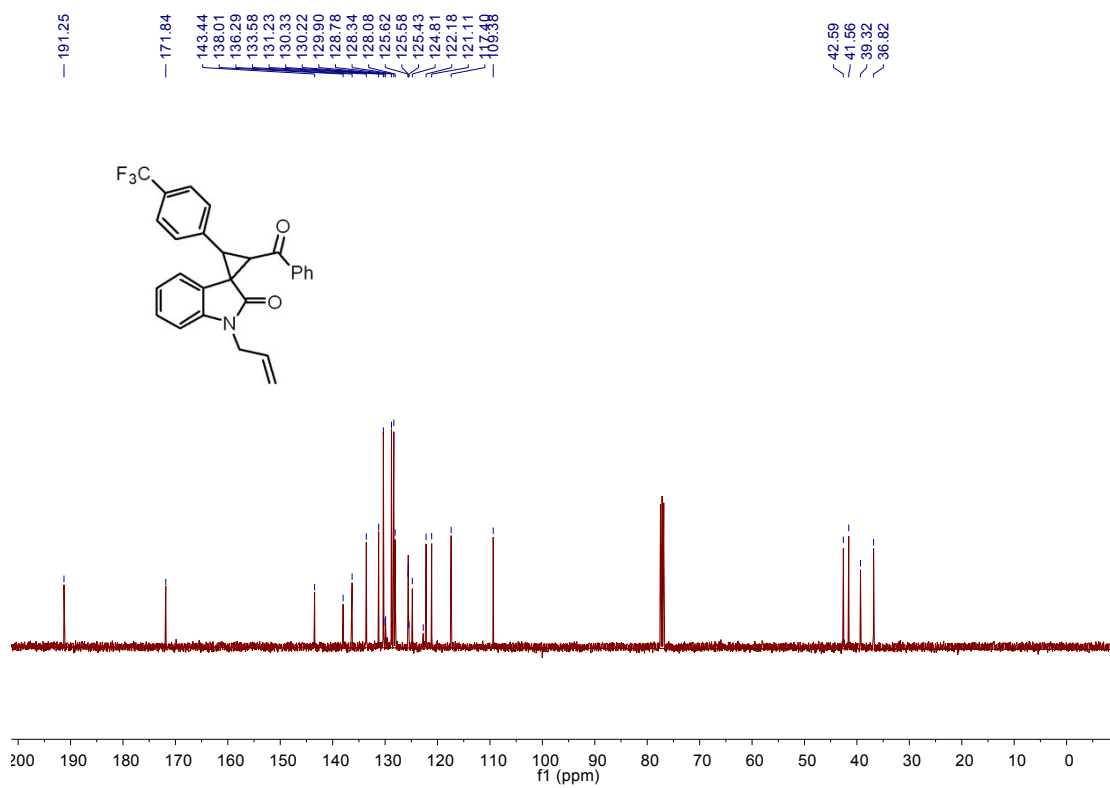

**<sup>13</sup>C NMR spectrum of 4I**

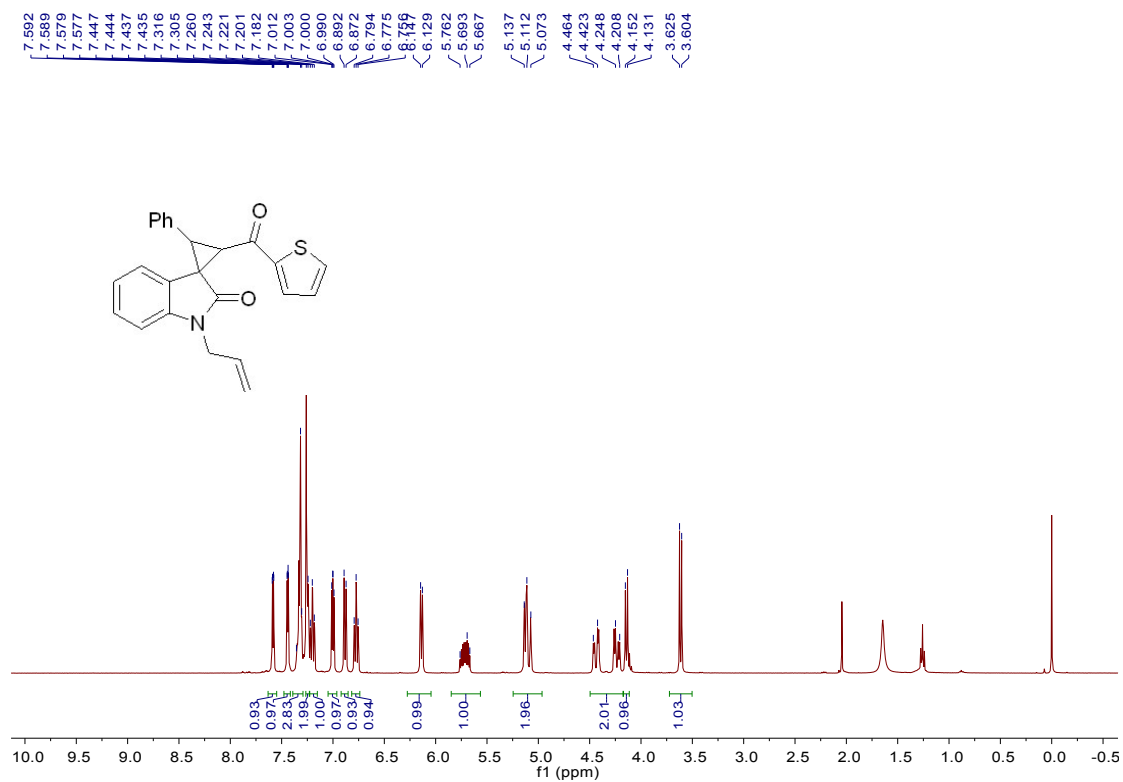

<sup>1</sup>H NMR spectrum of 4m

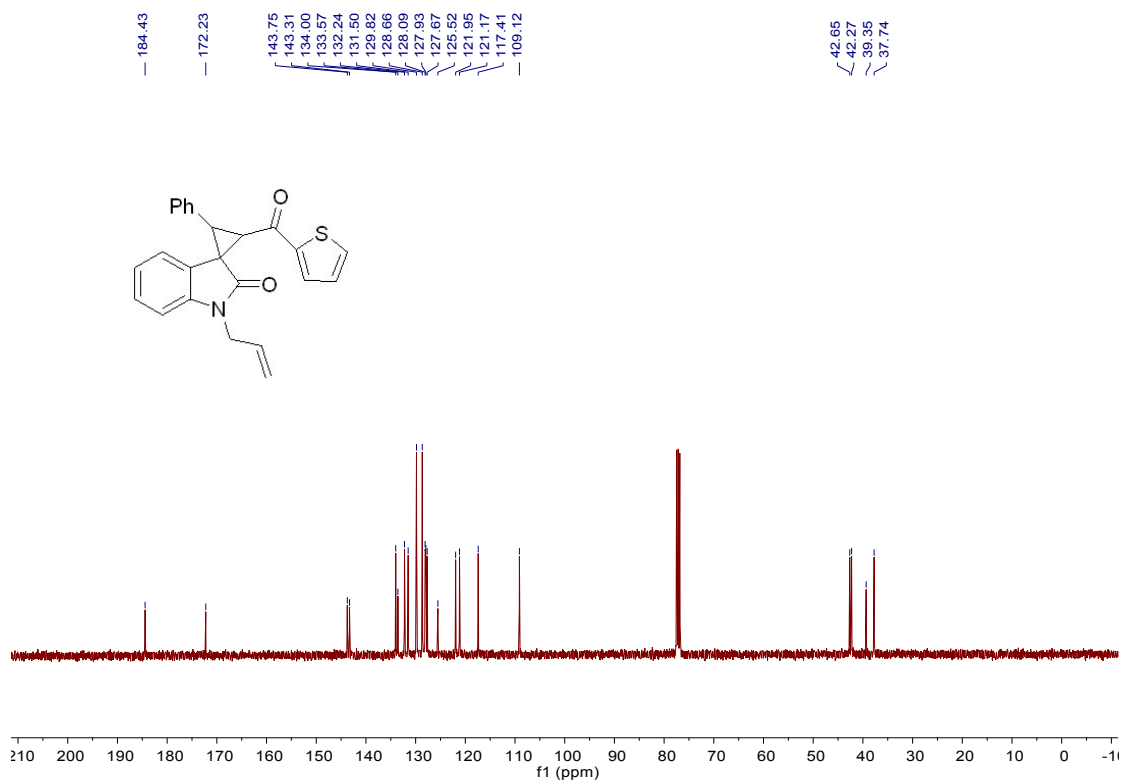

<sup>13</sup>C NMR spectrum of 4m

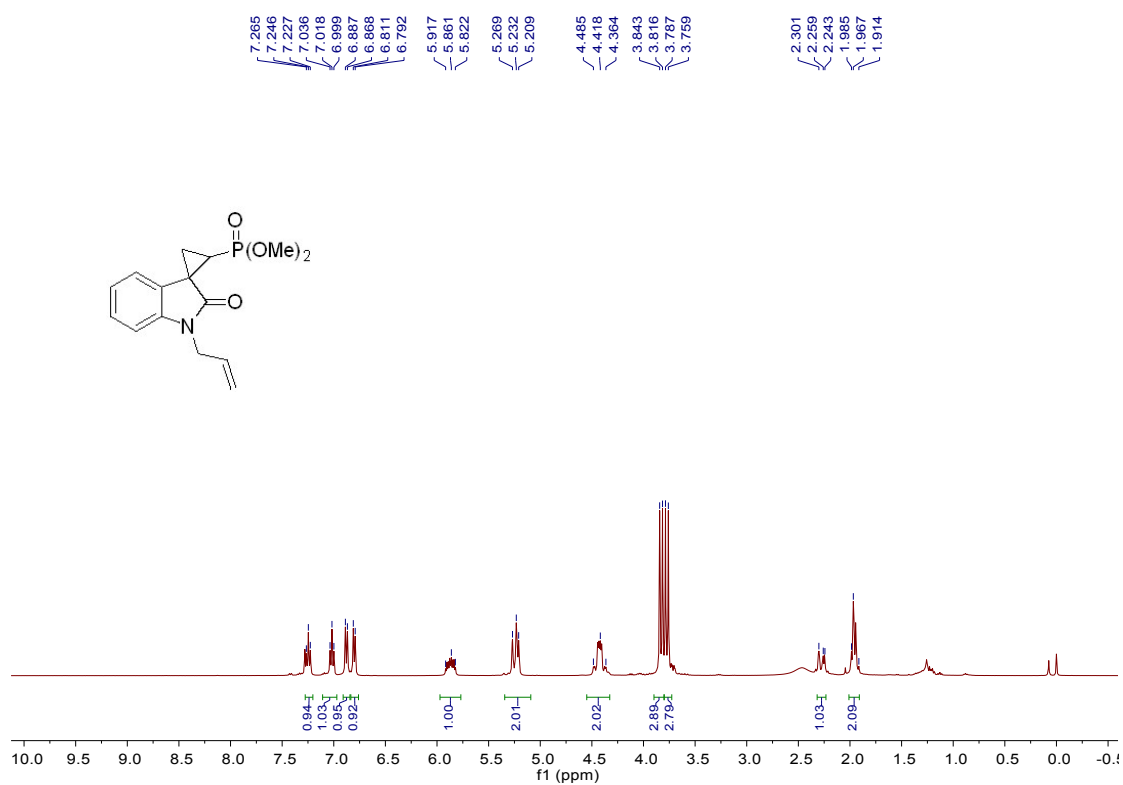

<sup>1</sup>H NMR spectrum of **4n**

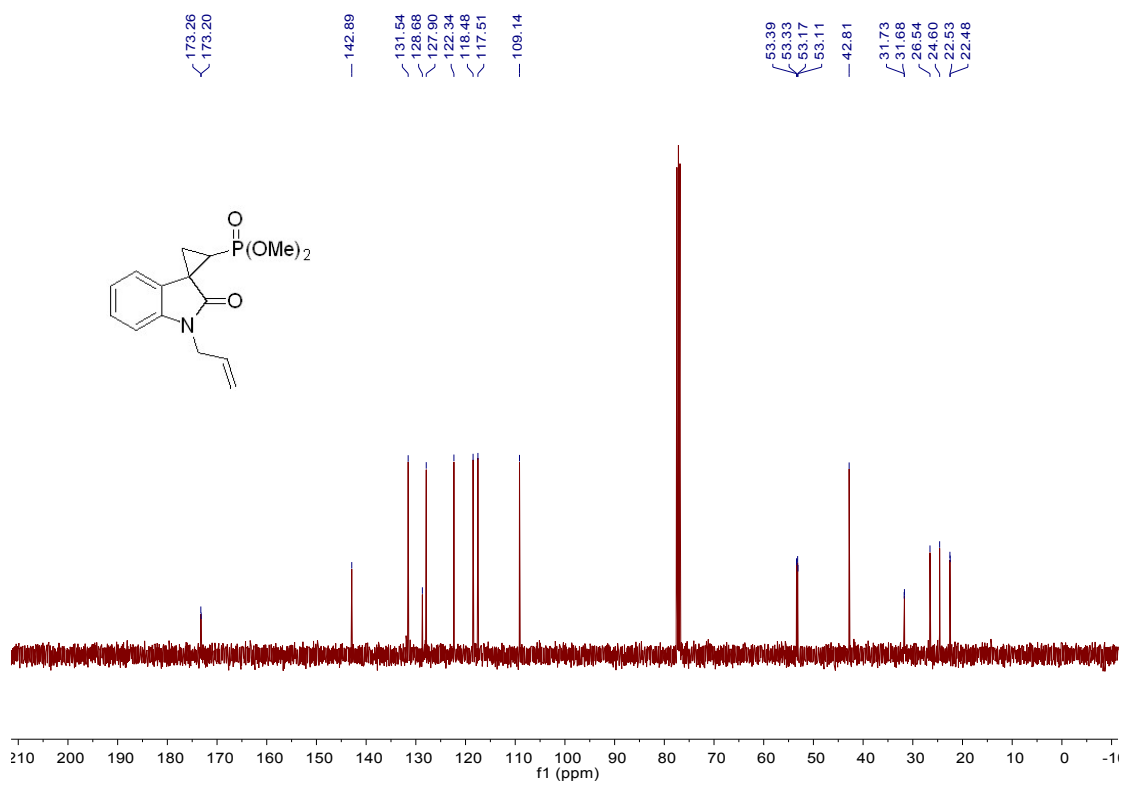

<sup>13</sup>C NMR spectrum of **4n**

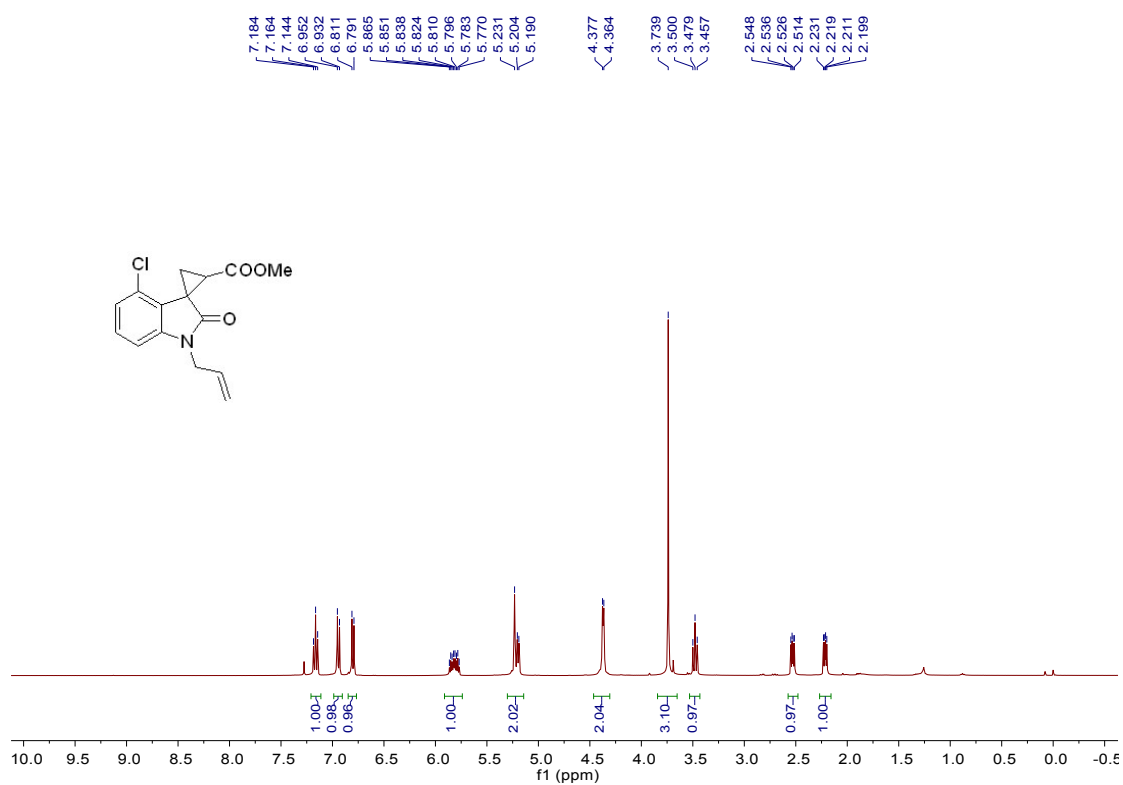

<sup>1</sup>H NMR spectrum of **4o**

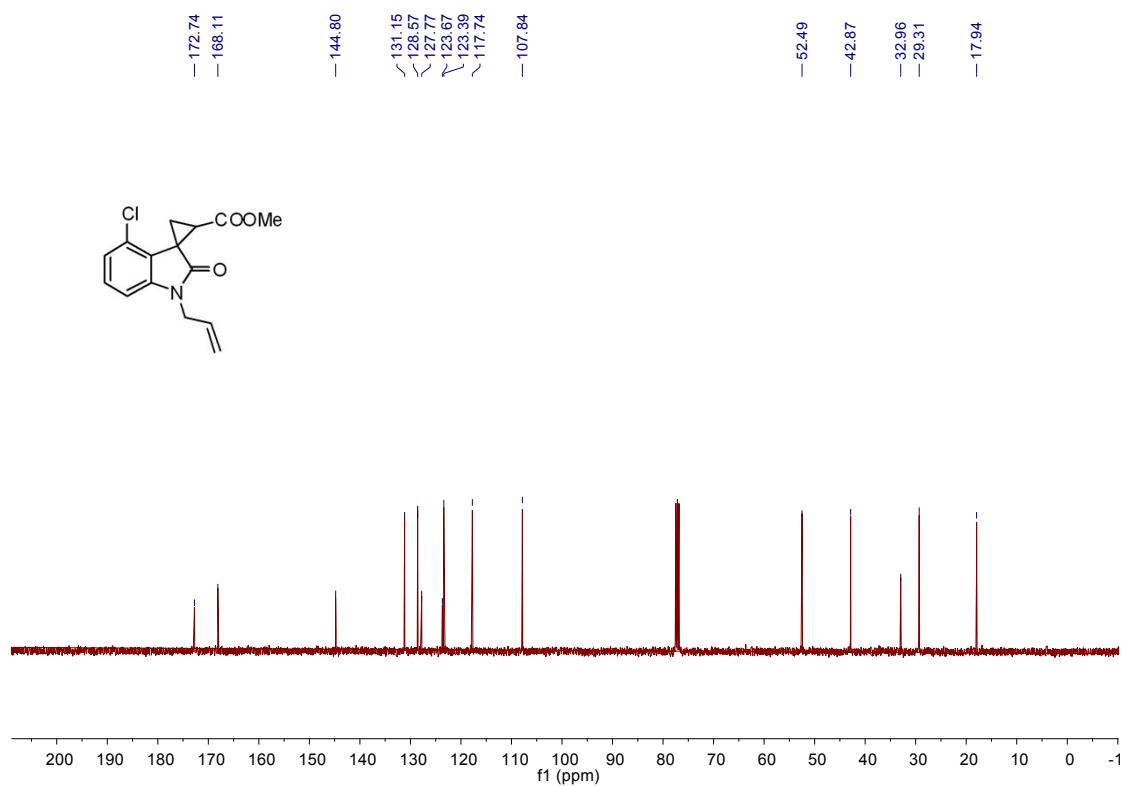

<sup>13</sup>C NMR spectrum of **4o**

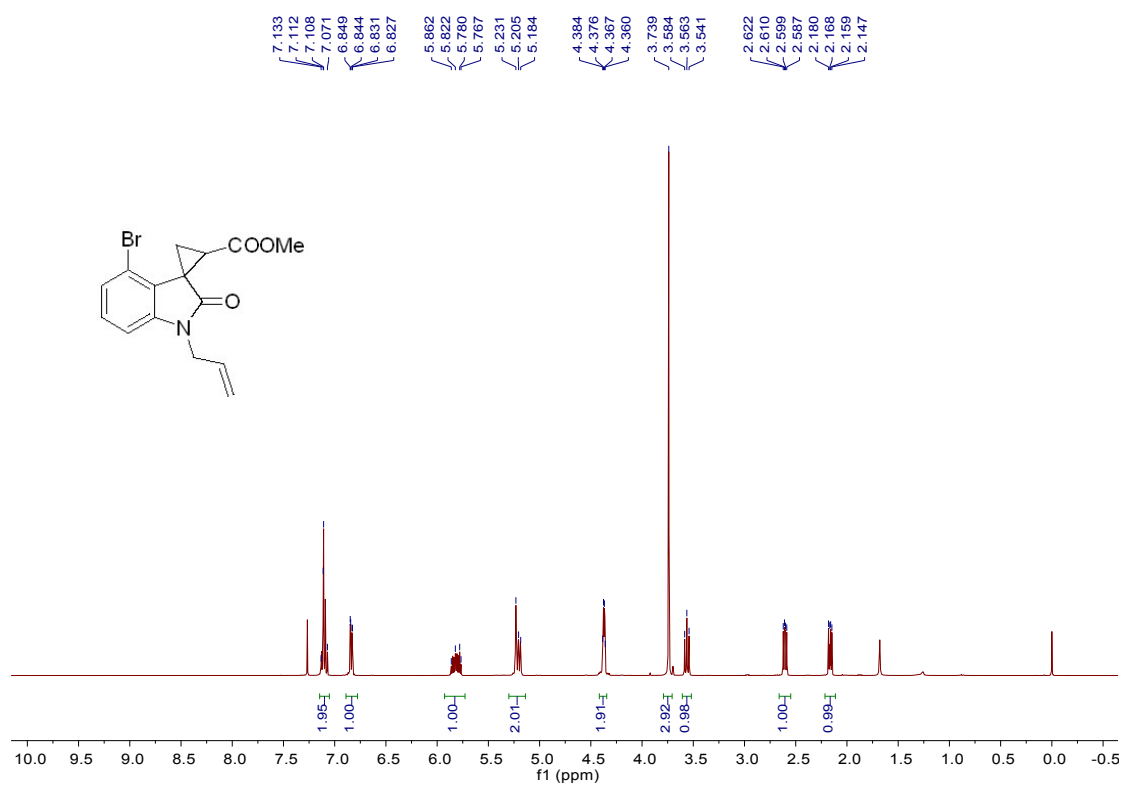

<sup>1</sup>H NMR spectrum of **4p**

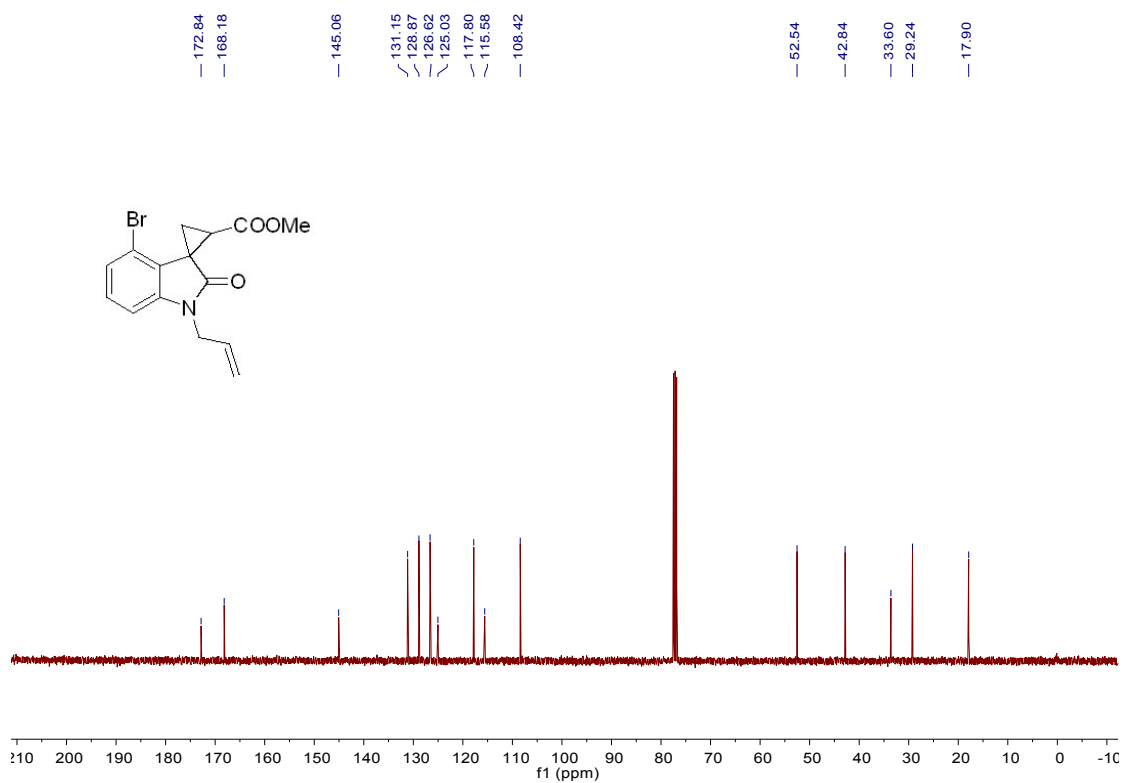

<sup>13</sup>C NMR spectrum of **4p**

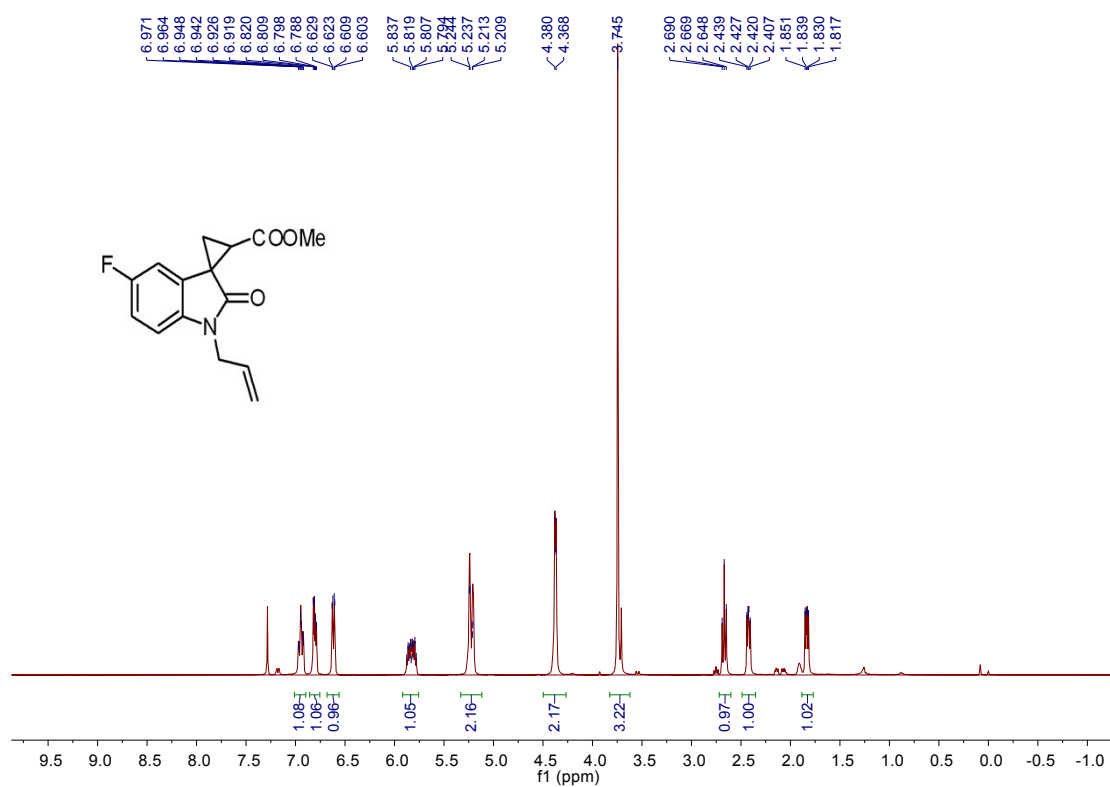

$^1\text{H}$  NMR spectrum of **4q**

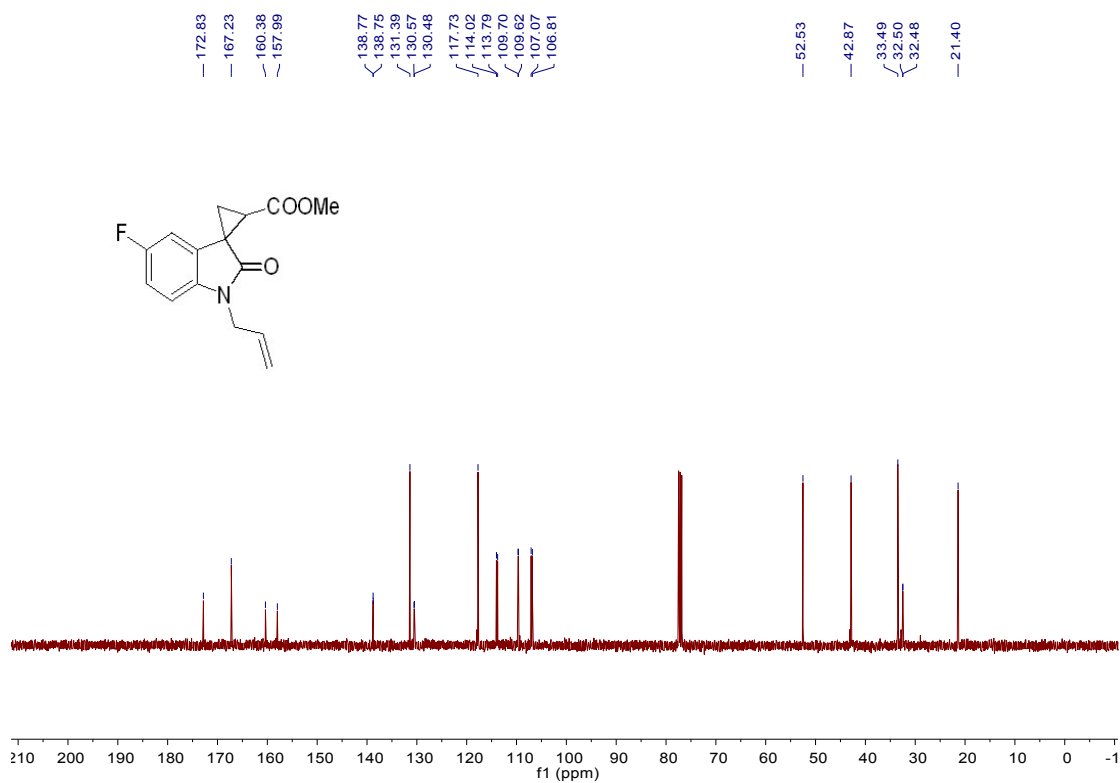

$^{13}\text{C}$  NMR spectrum of **4q**



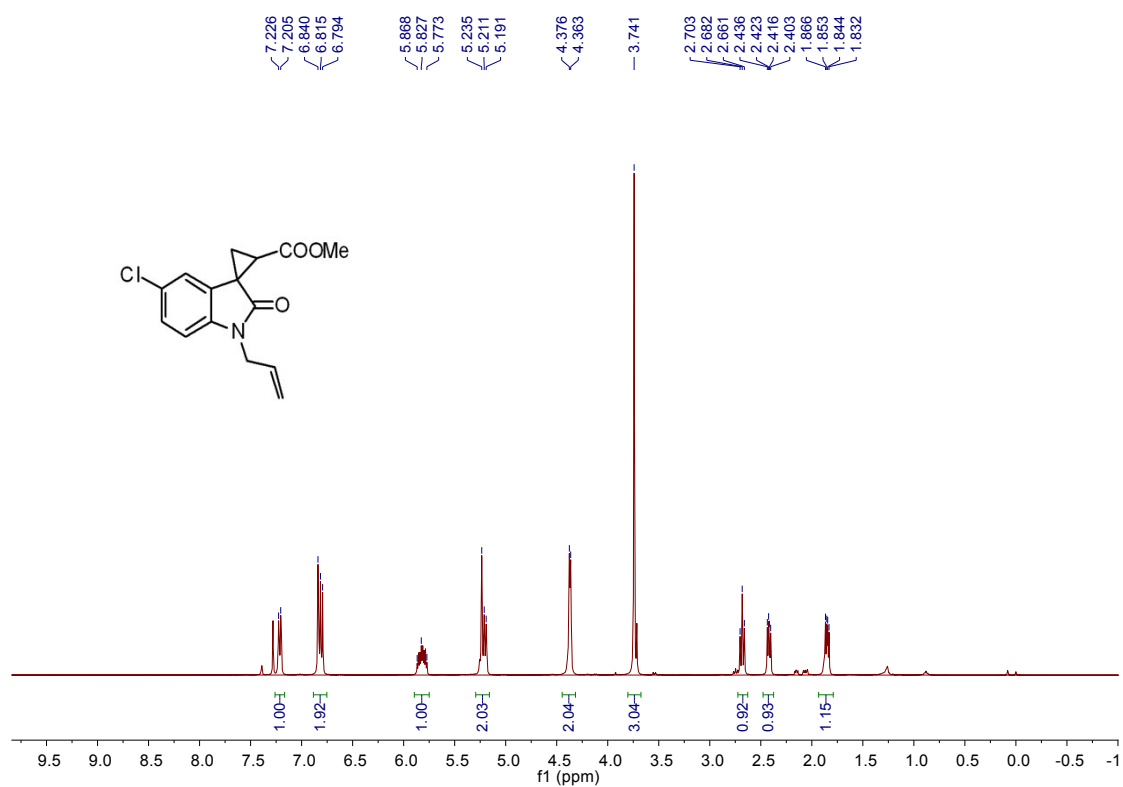

<sup>1</sup>H NMR spectrum of **4r**

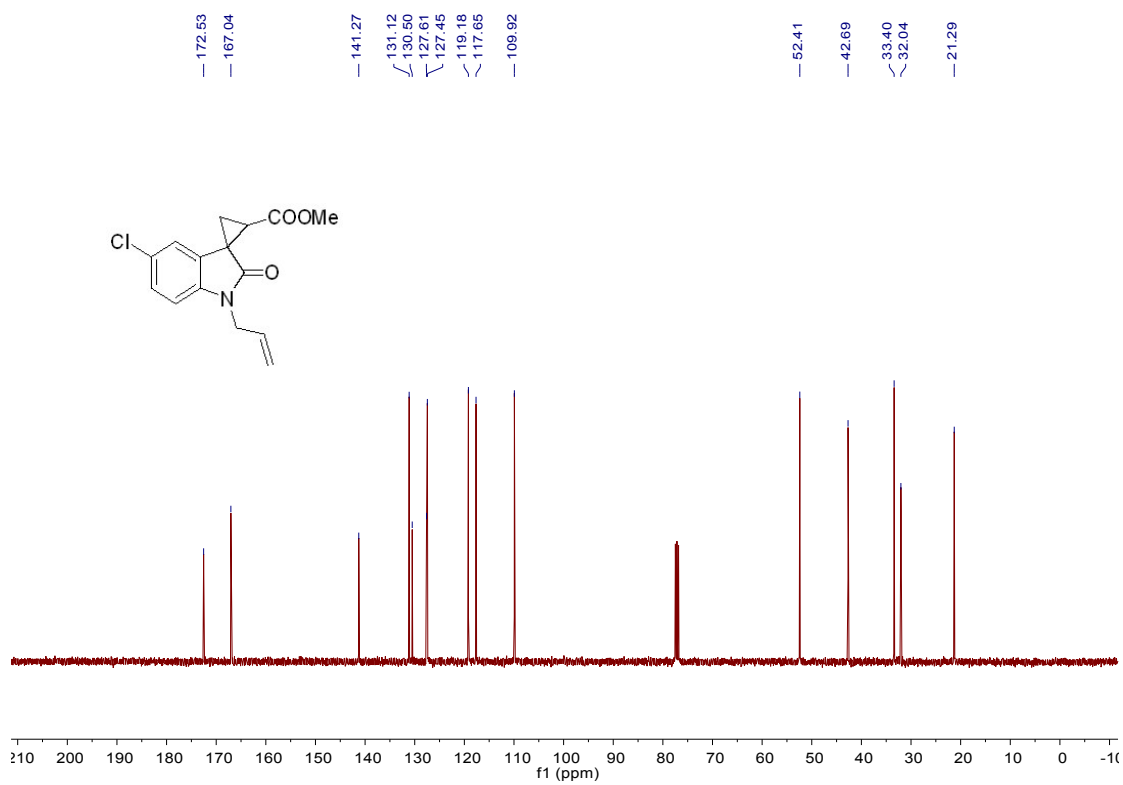

<sup>13</sup>C NMR spectrum of **4r**

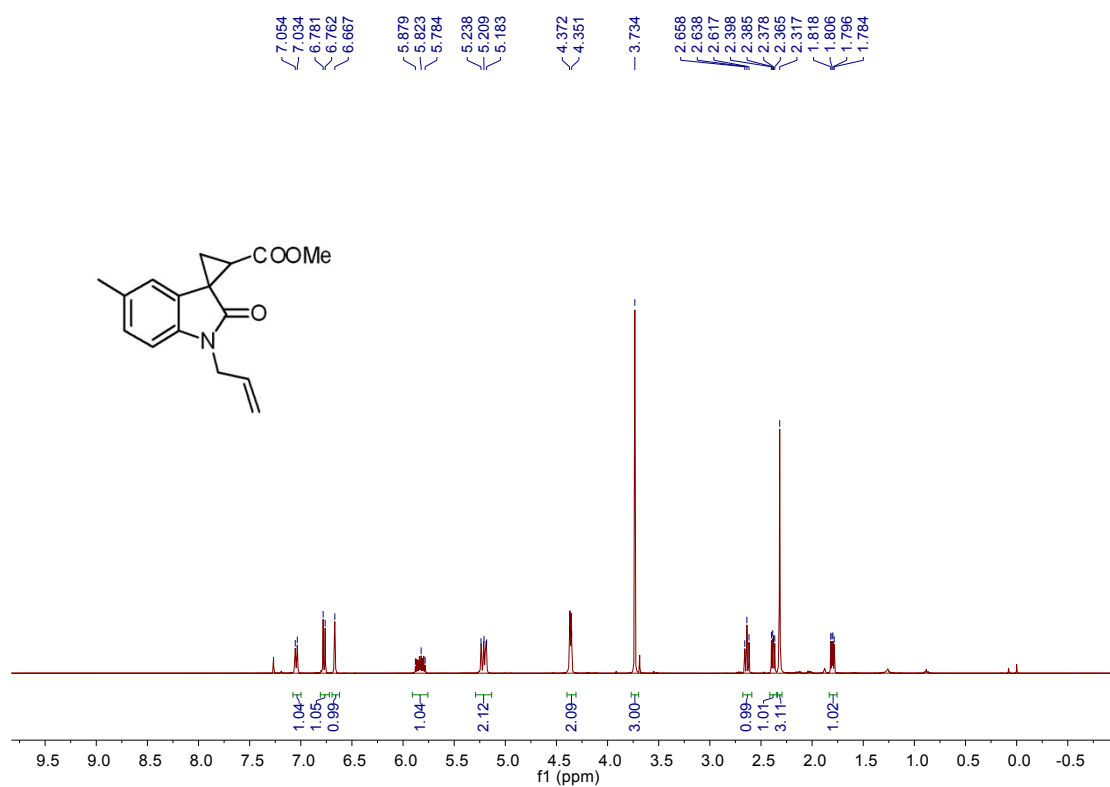

<sup>1</sup>H NMR spectrum of **4s**

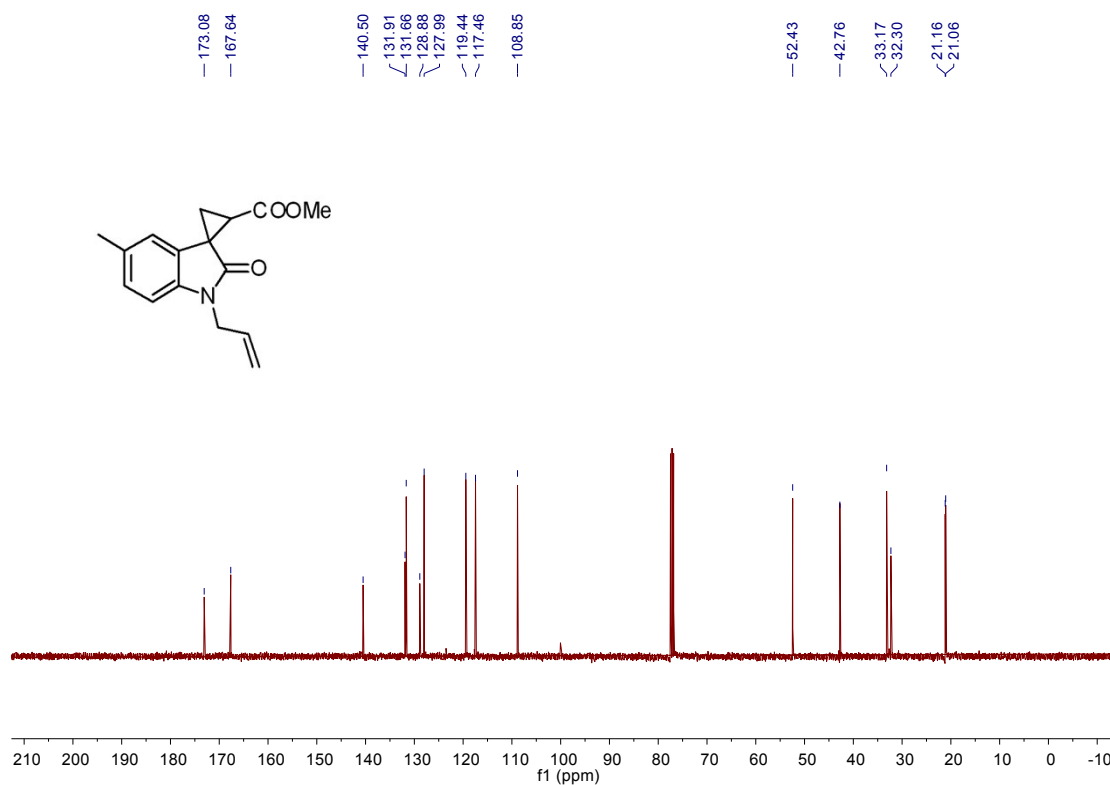

<sup>13</sup>C NMR spectrum of **4s**

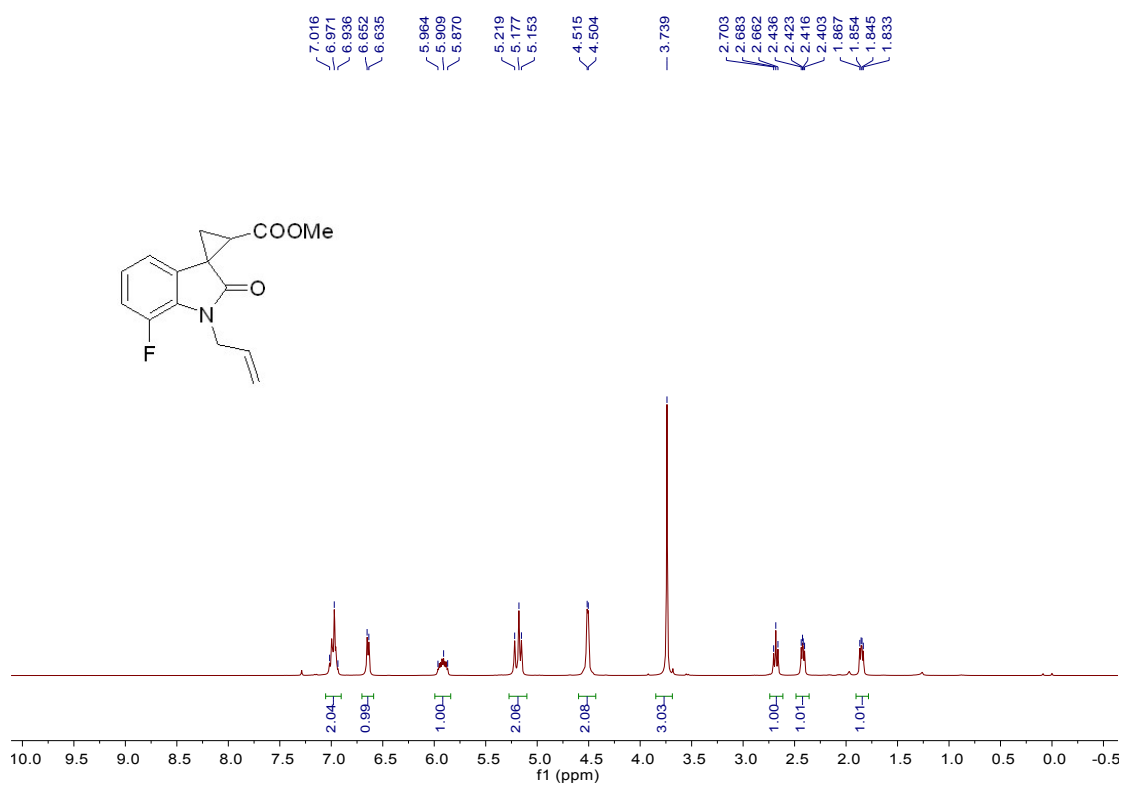

<sup>1</sup>H NMR spectrum of **4t**

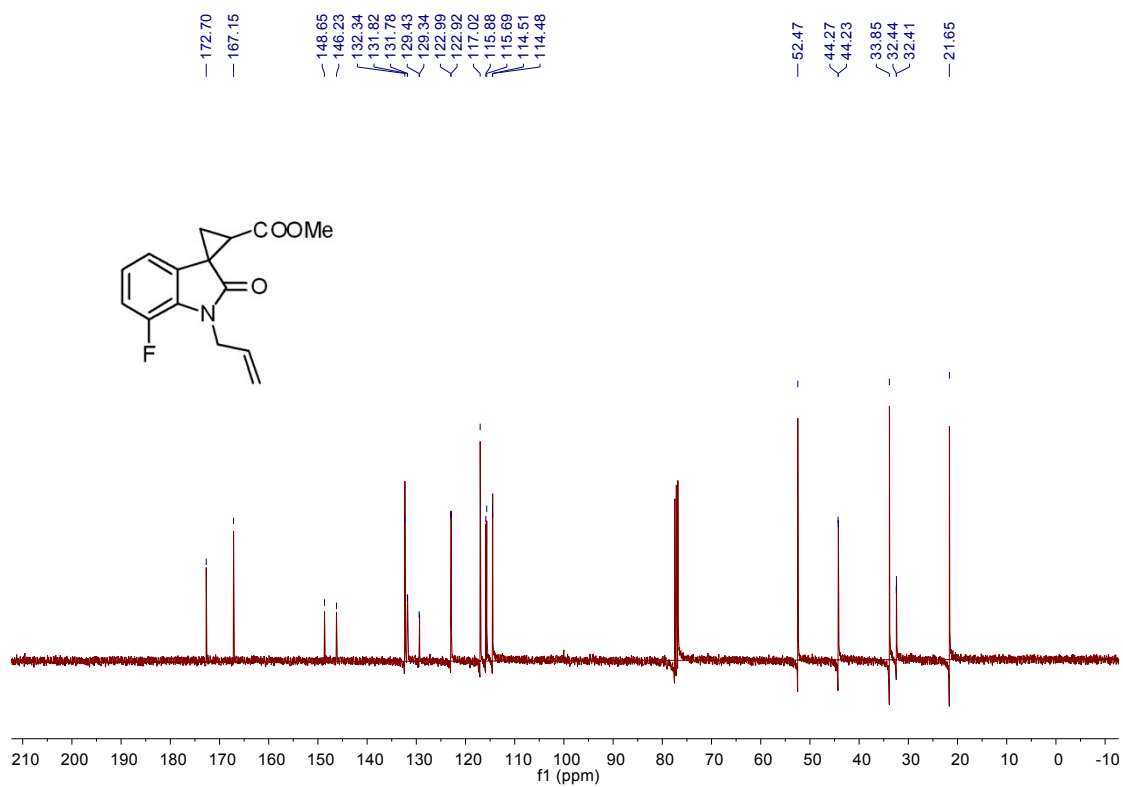

<sup>13</sup>C NMR spectrum of **4t**

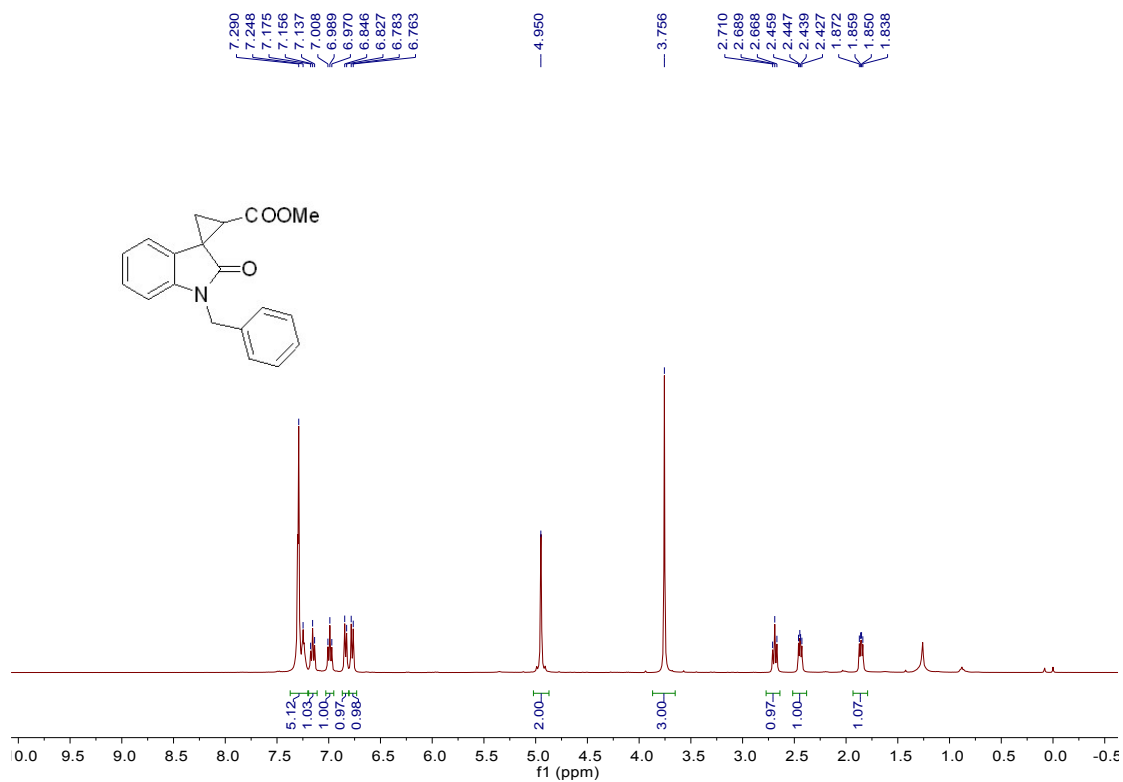

<sup>1</sup>H NMR spectrum of **4u**

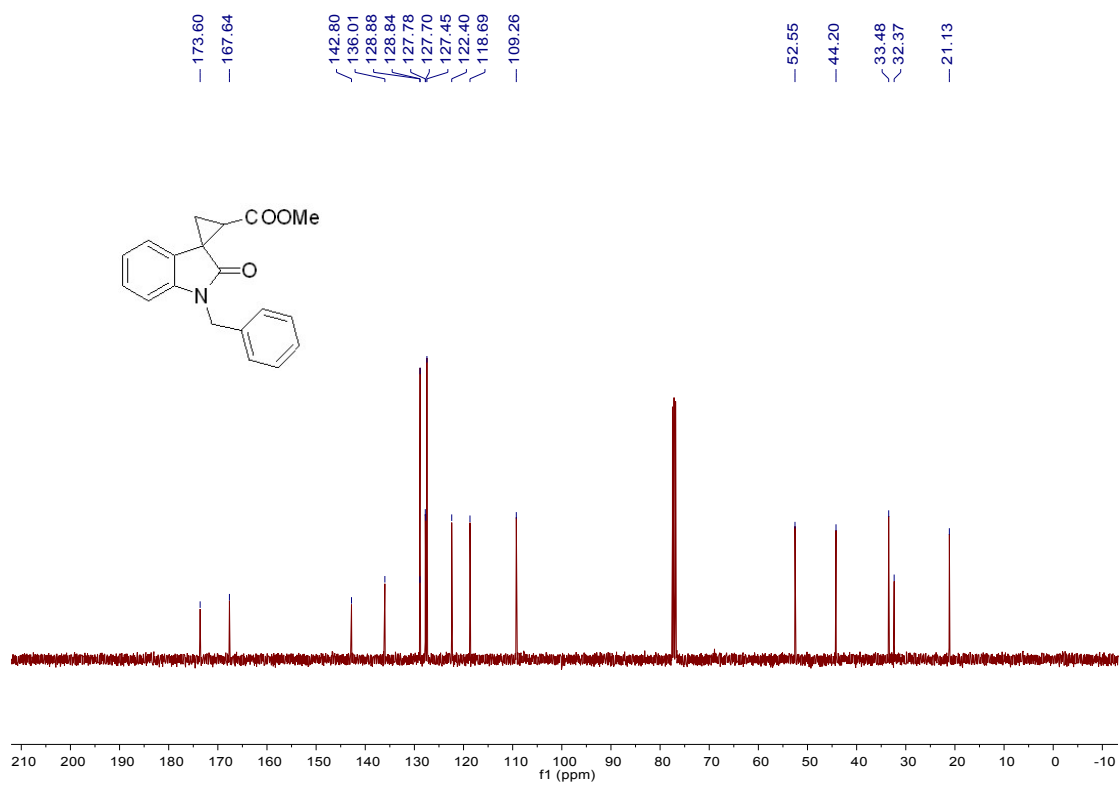

<sup>13</sup>C NMR spectrum of **4u**

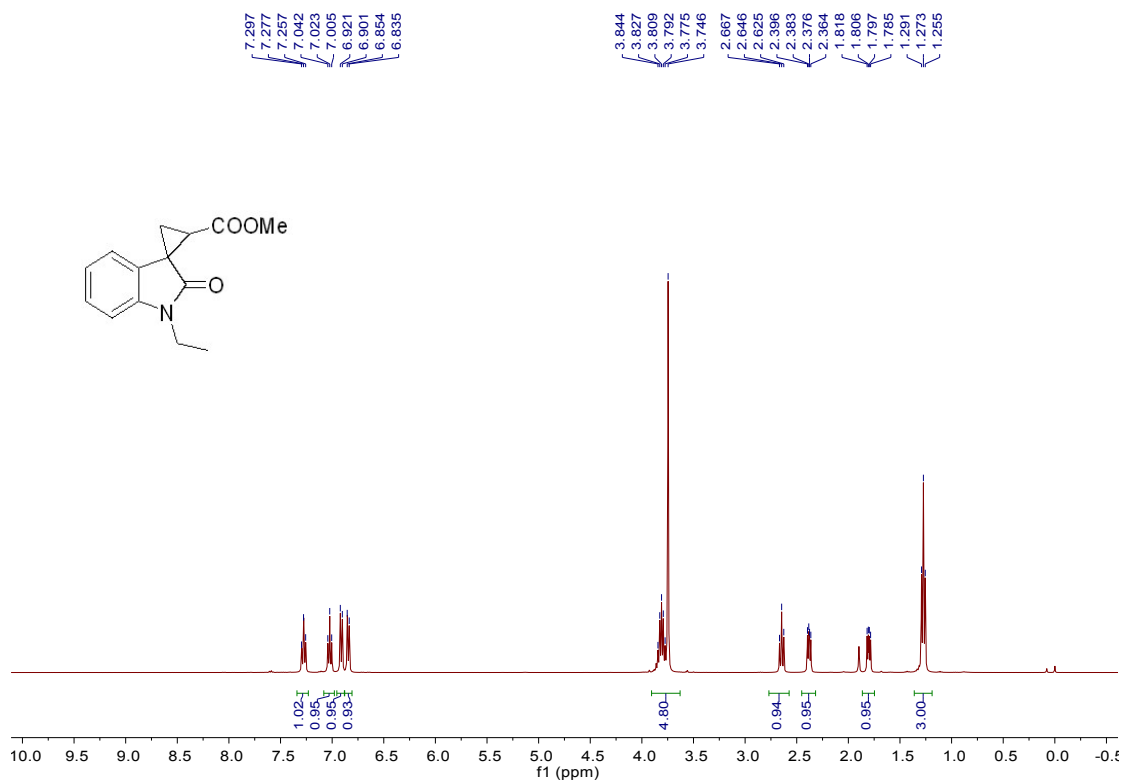

<sup>1</sup>H NMR spectrum of 4v

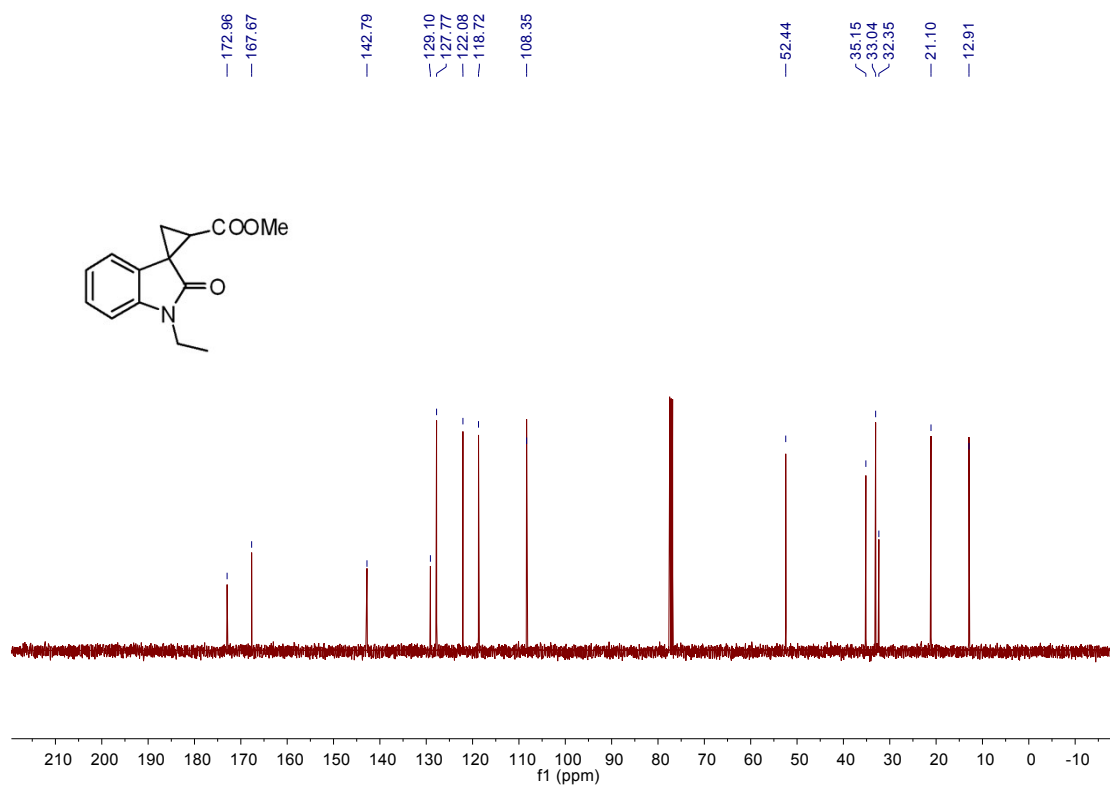

<sup>13</sup>C NMR spectrum of 4v

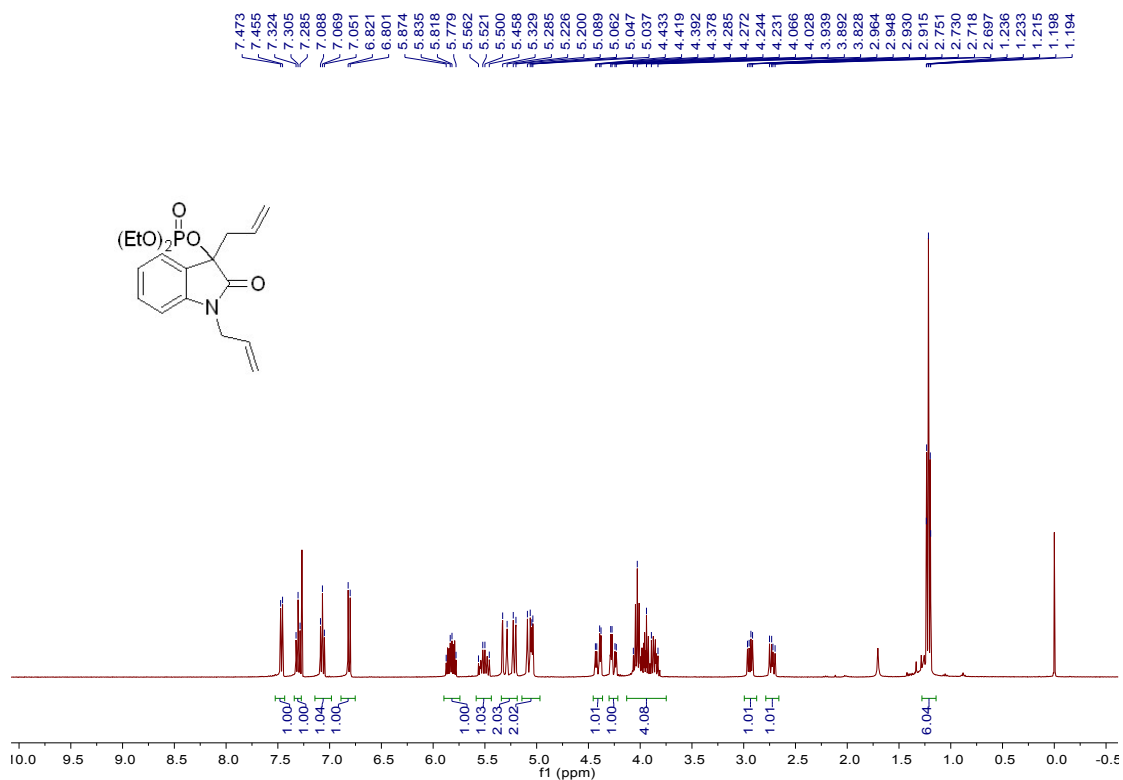

<sup>1</sup>H NMR spectrum of 7a

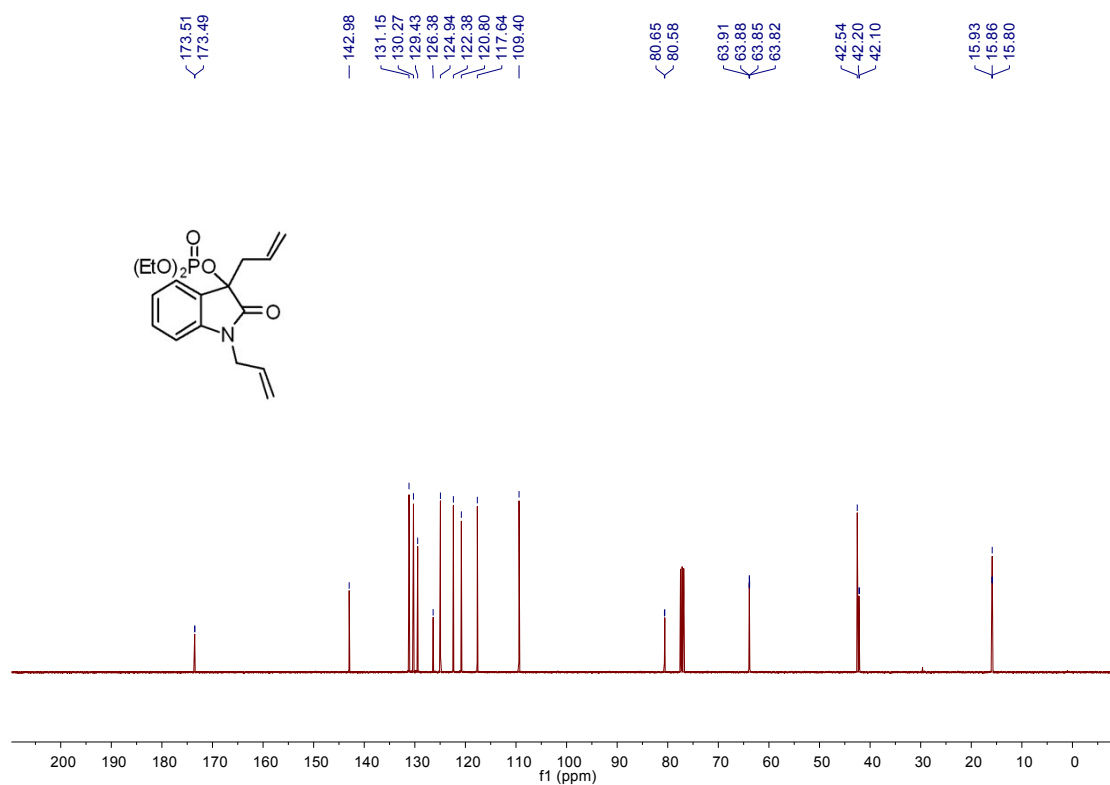

<sup>13</sup>C NMR spectrum of 7a

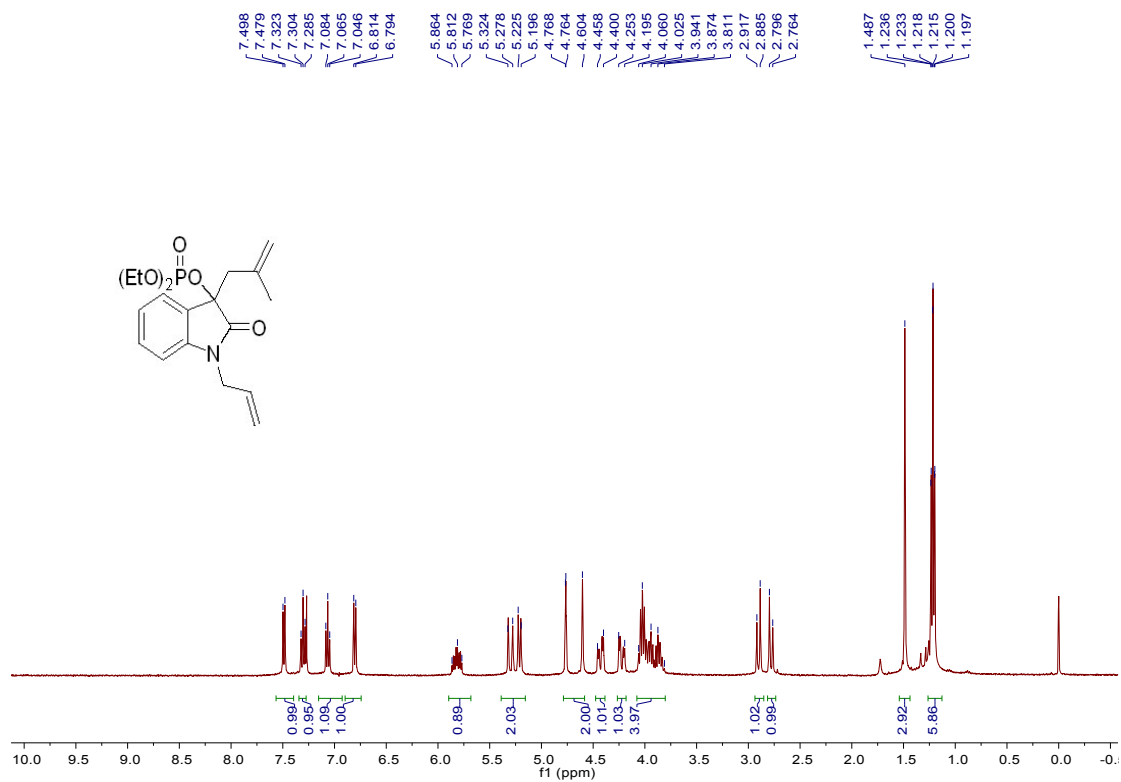

$^1\text{H}$  NMR spectrum of **7b**

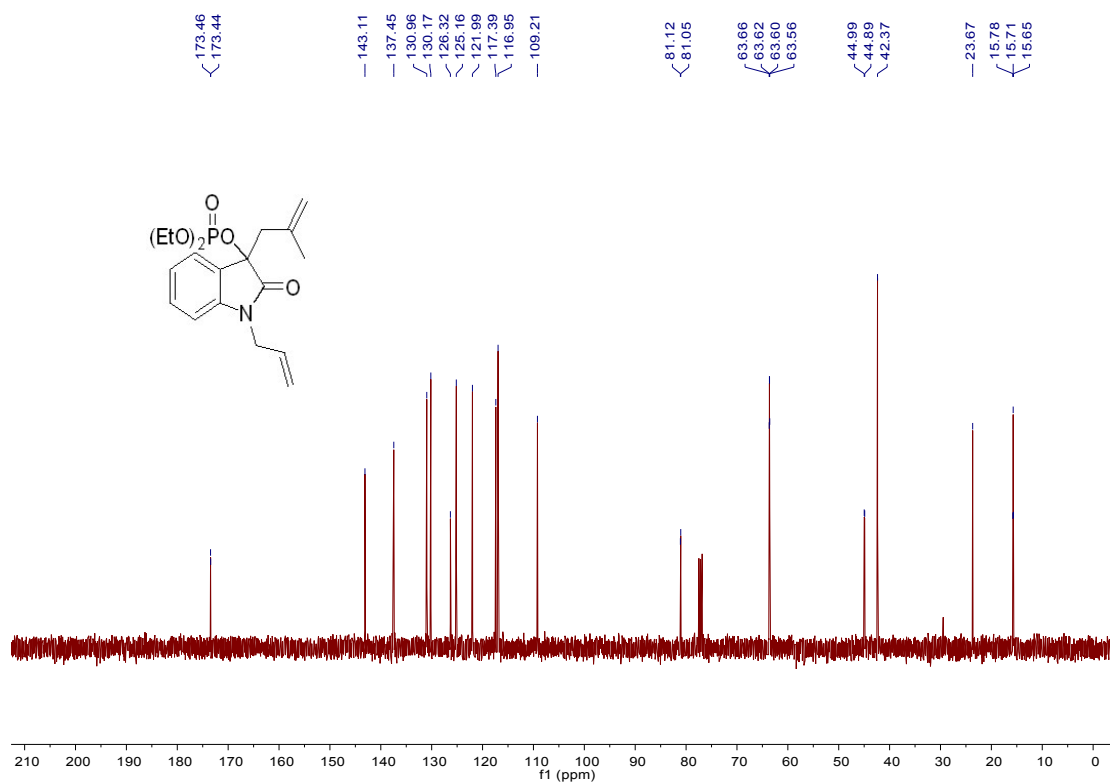

$^{13}\text{C}$  NMR spectrum of **7b**

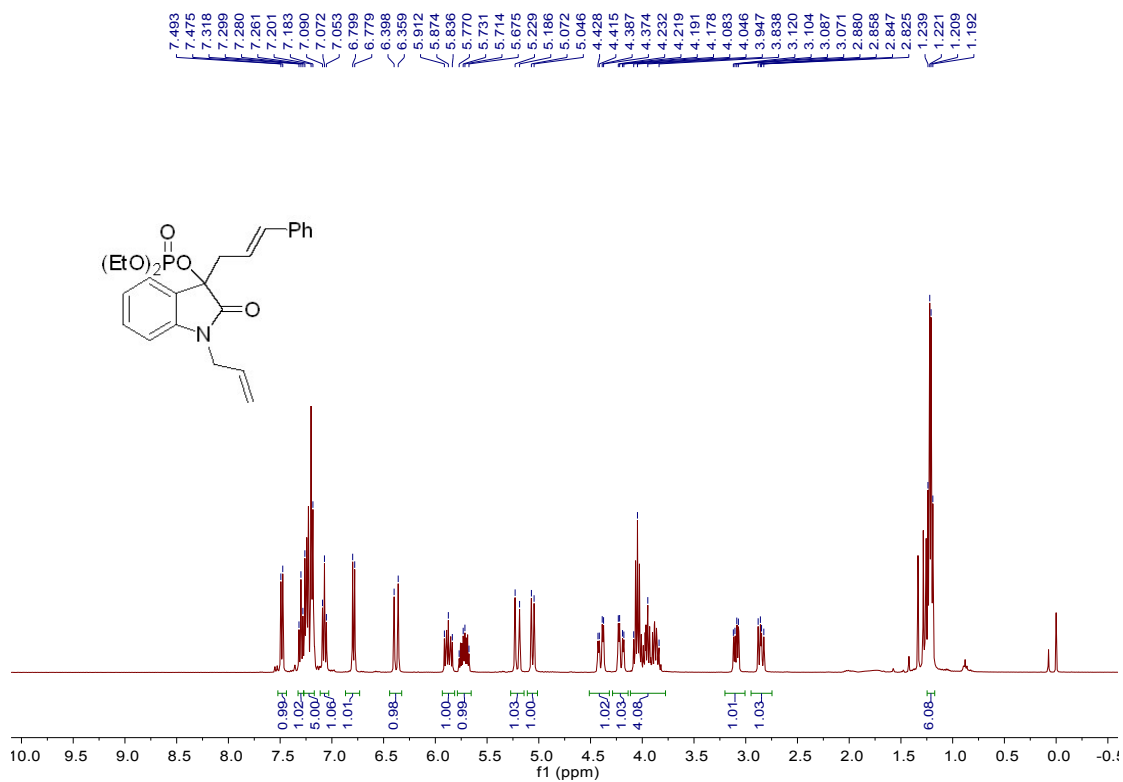

<sup>1</sup>H NMR spectrum of 7c

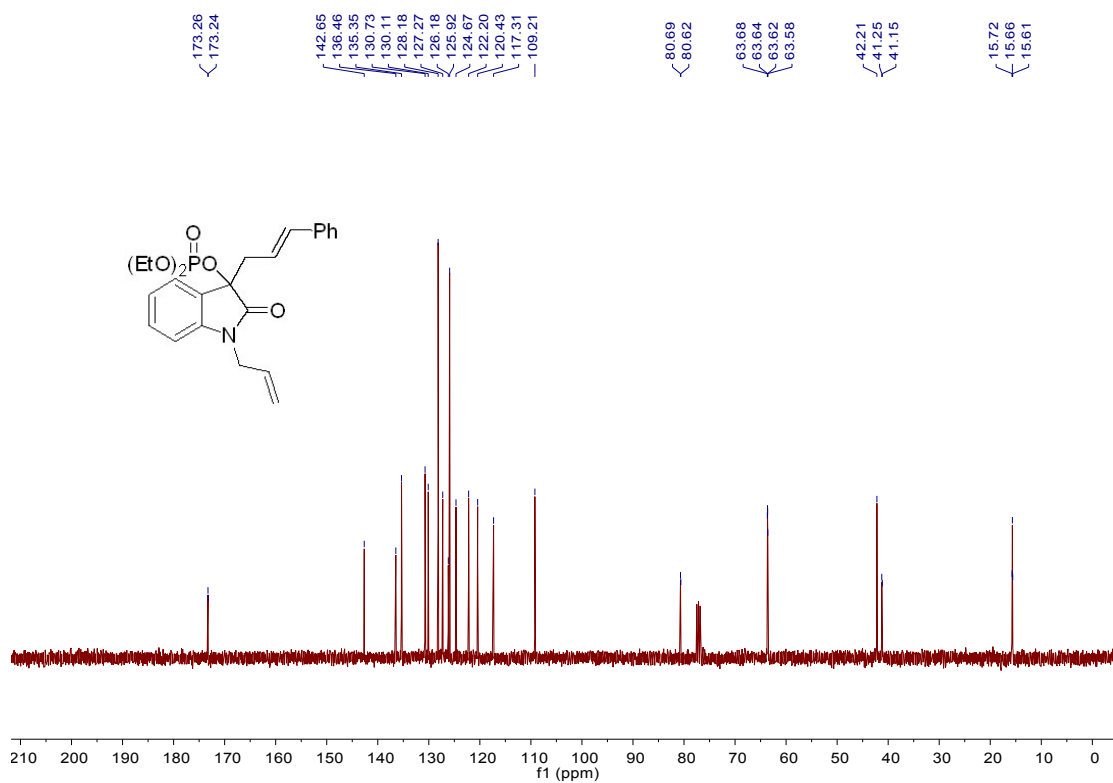

<sup>13</sup>C NMR spectrum of 7c



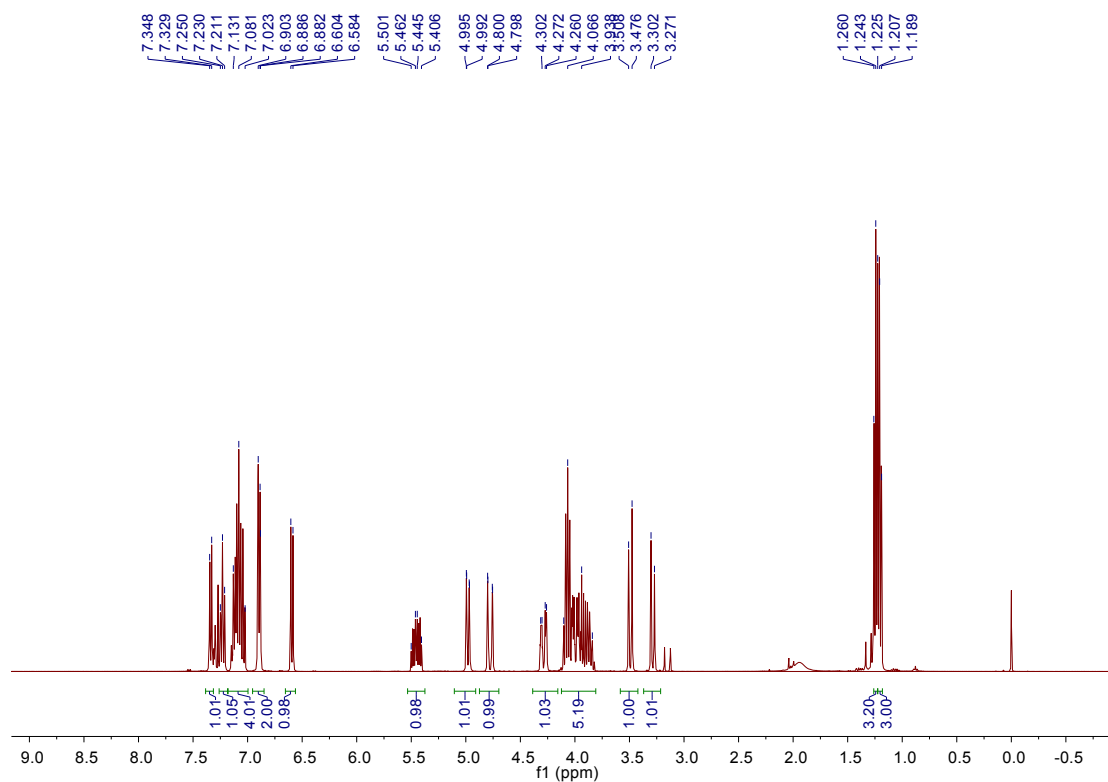

<sup>1</sup>H NMR spectrum of **7d**

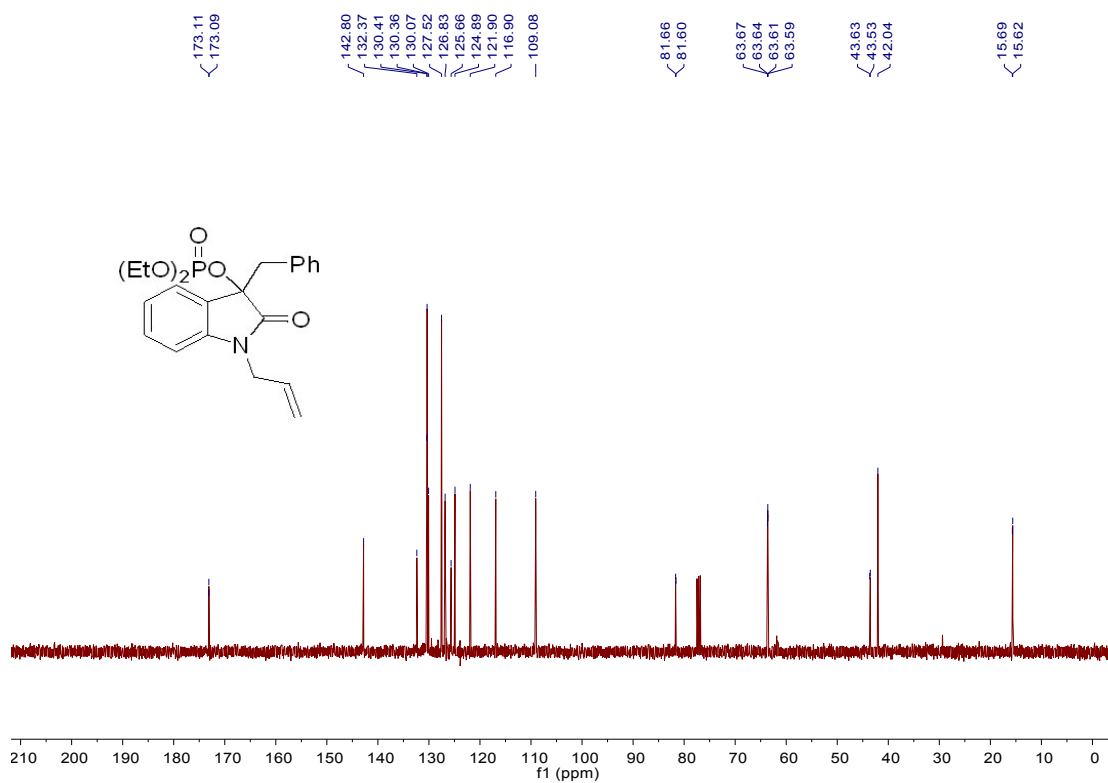

<sup>13</sup>C NMR spectrum of **7d**

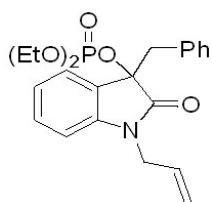

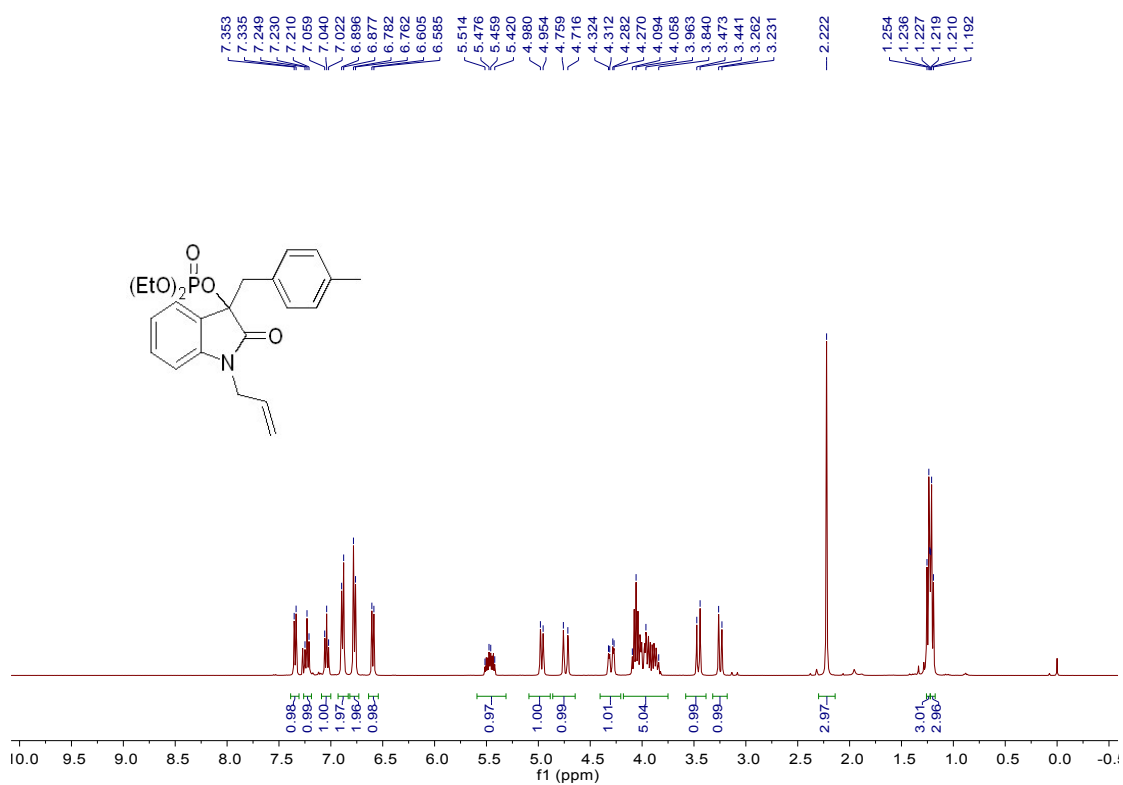

<sup>1</sup>H NMR spectrum of 7e

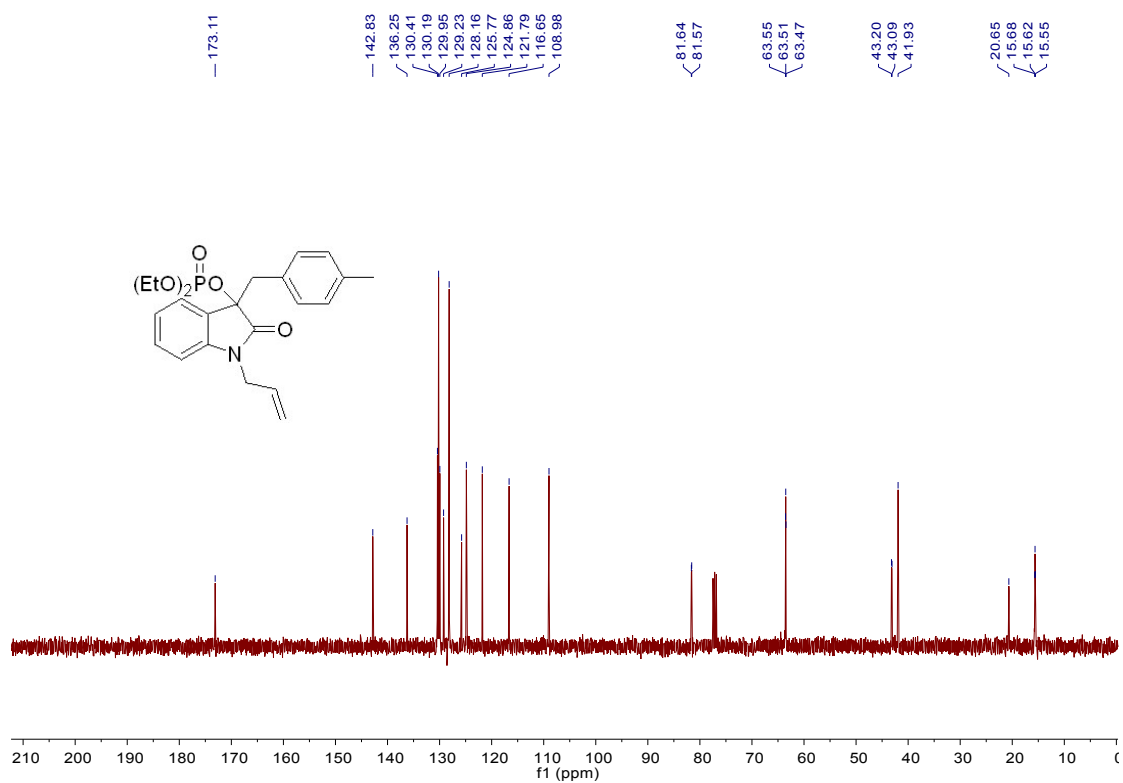

<sup>13</sup>C NMR spectrum of 7e

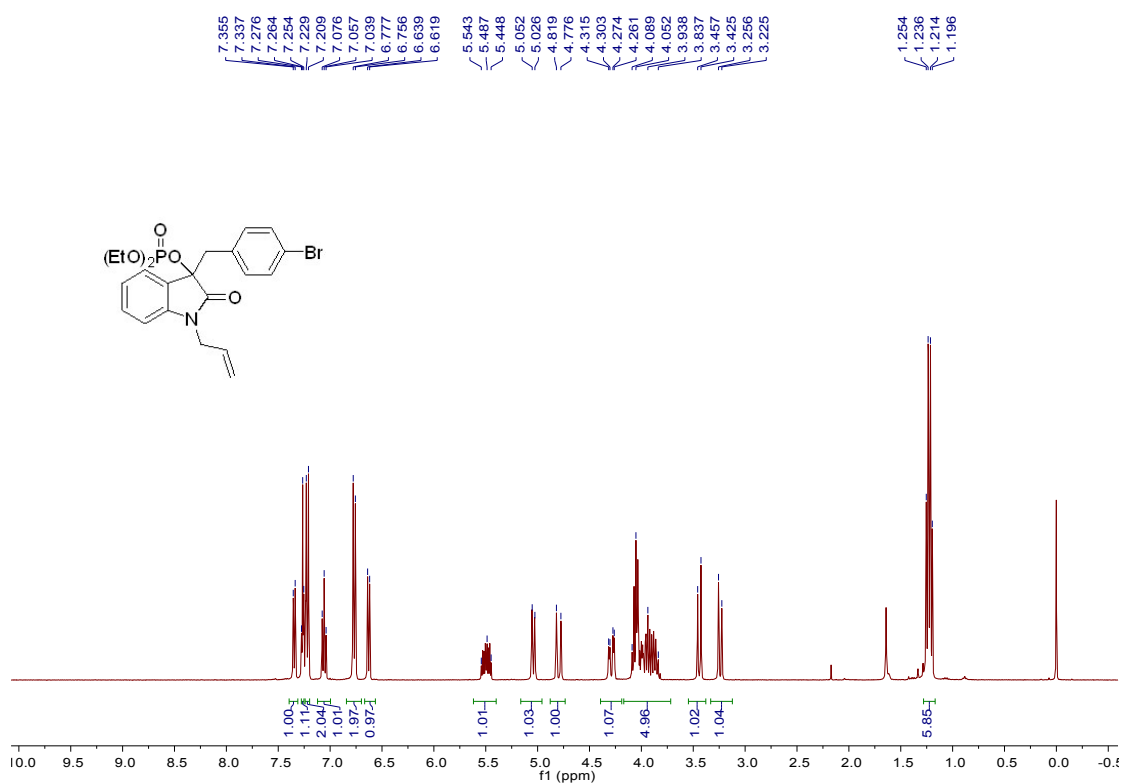

$^1\text{H}$  NMR spectrum of **7f**

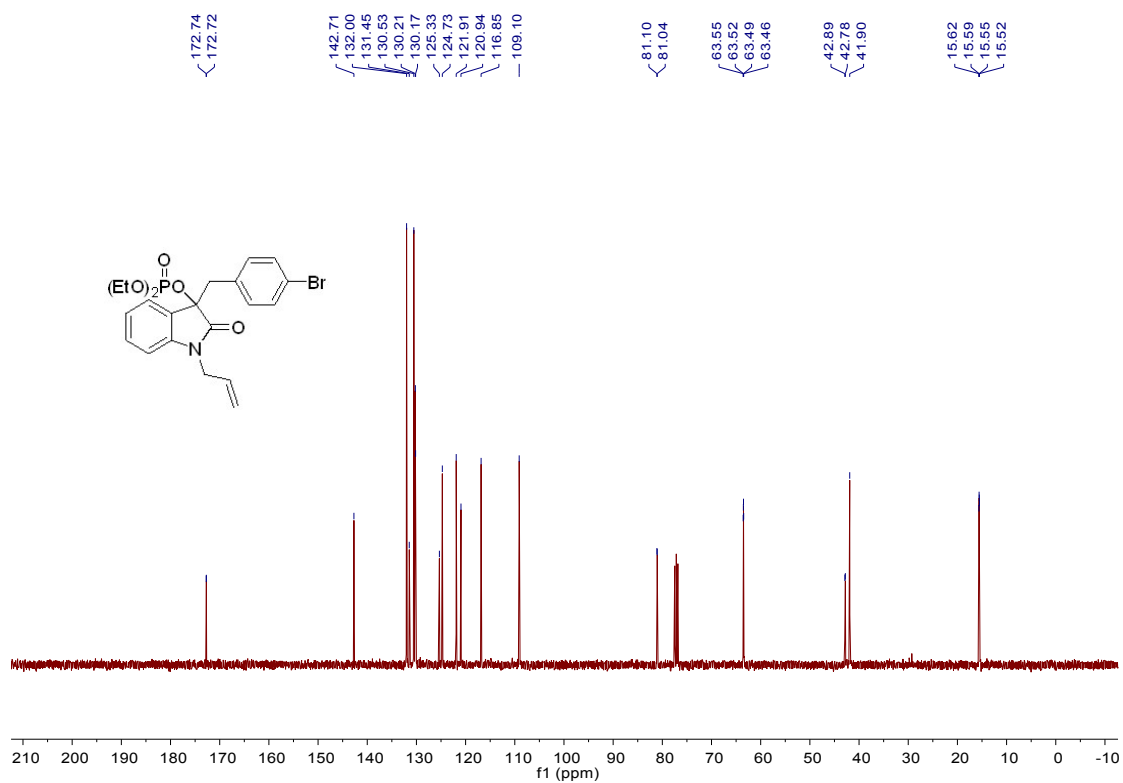

$^{13}\text{C}$  NMR spectrum of **7f**

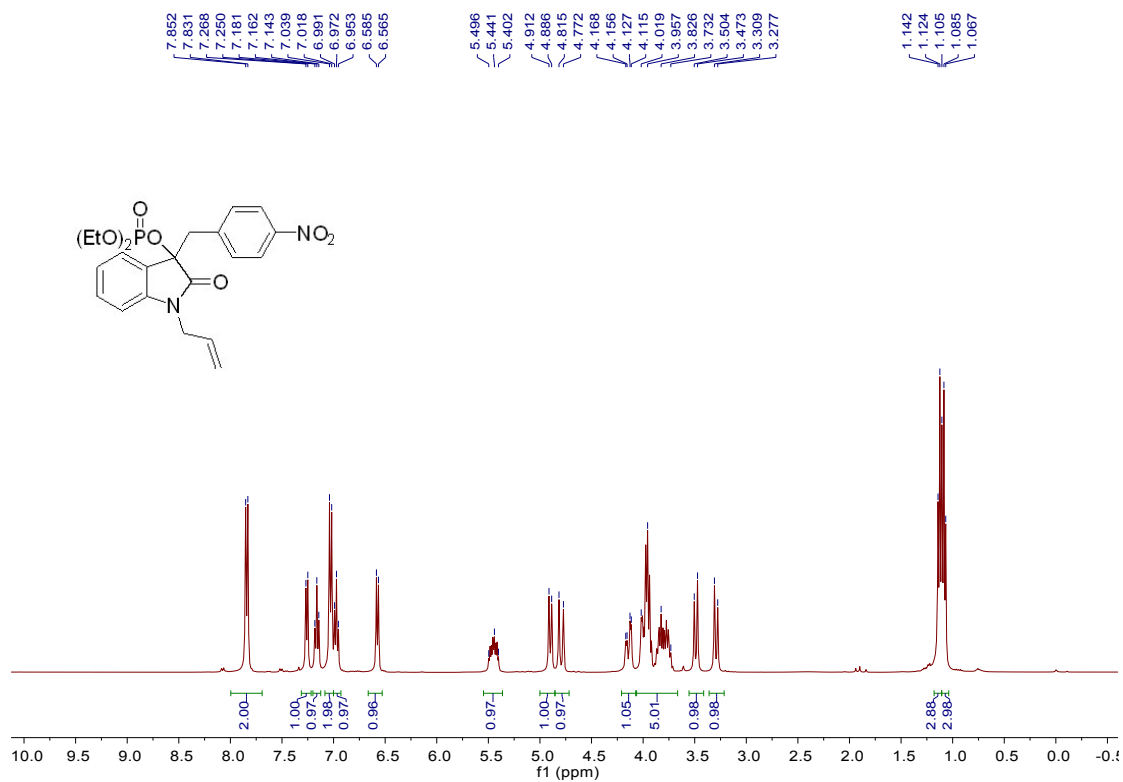

<sup>1</sup>H NMR spectrum of **7g**

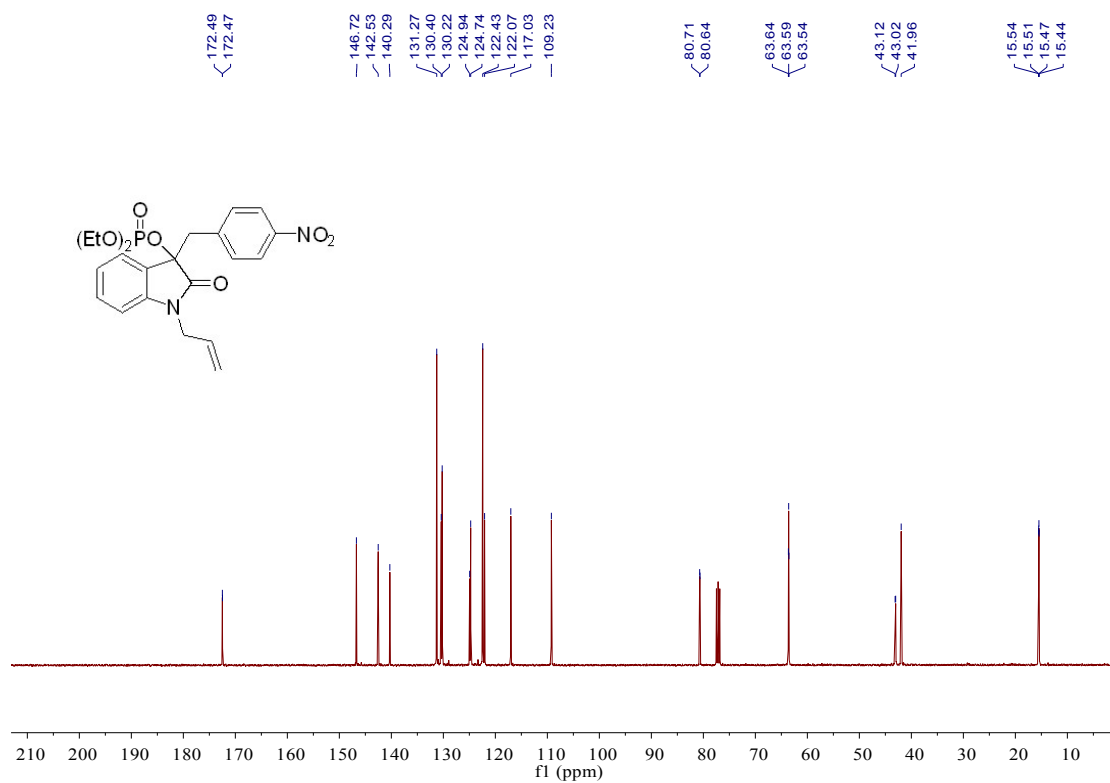

<sup>13</sup>C NMR spectrum of **7g**

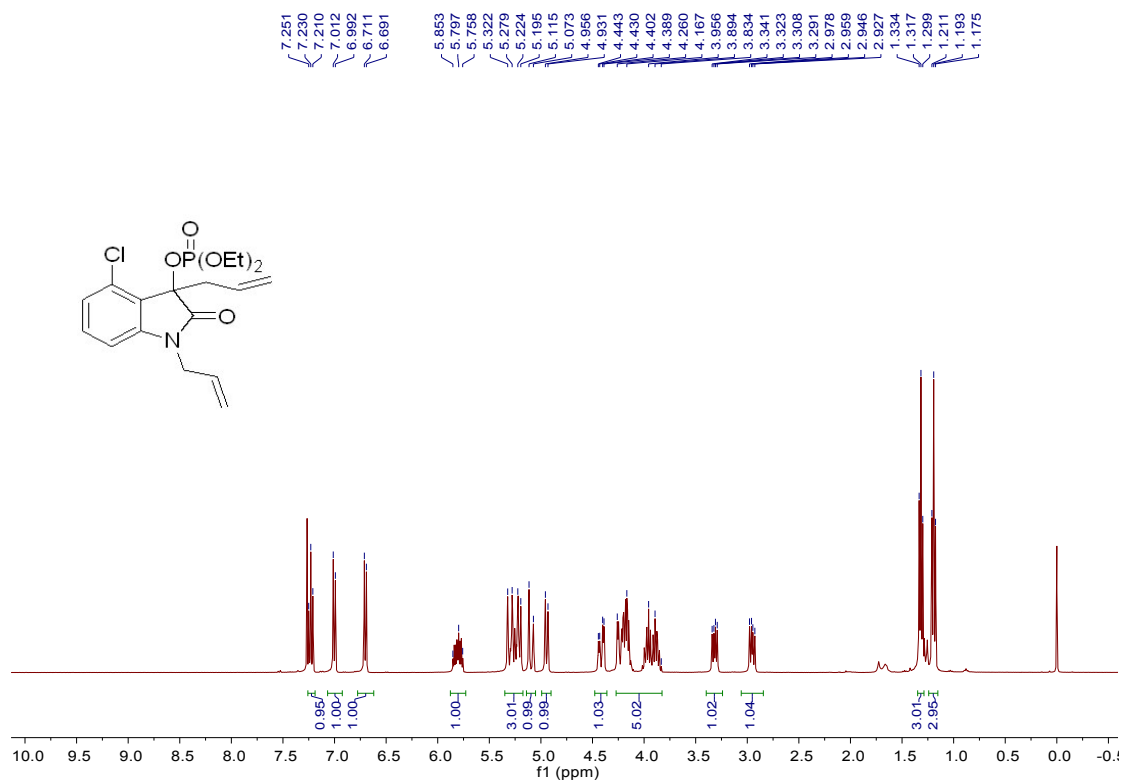

<sup>1</sup>H NMR spectrum of **7h**

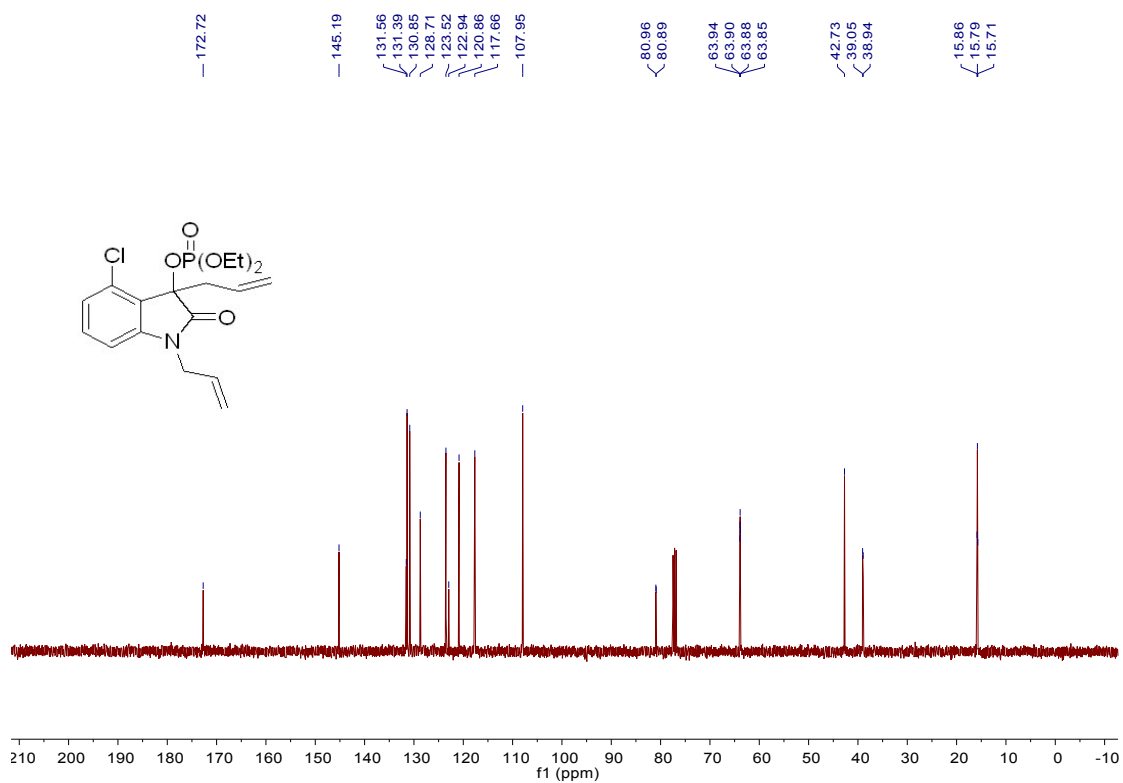

<sup>13</sup>C NMR spectrum of **7h**

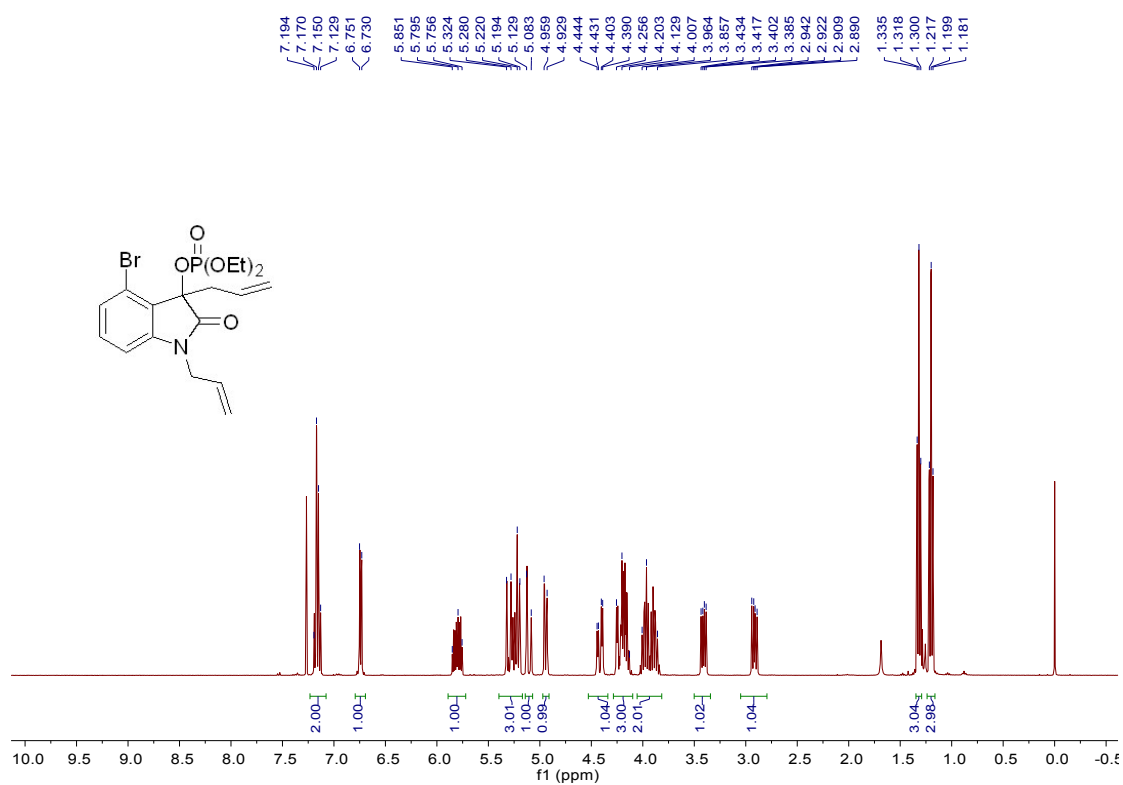

<sup>1</sup>H NMR spectrum of **7i**

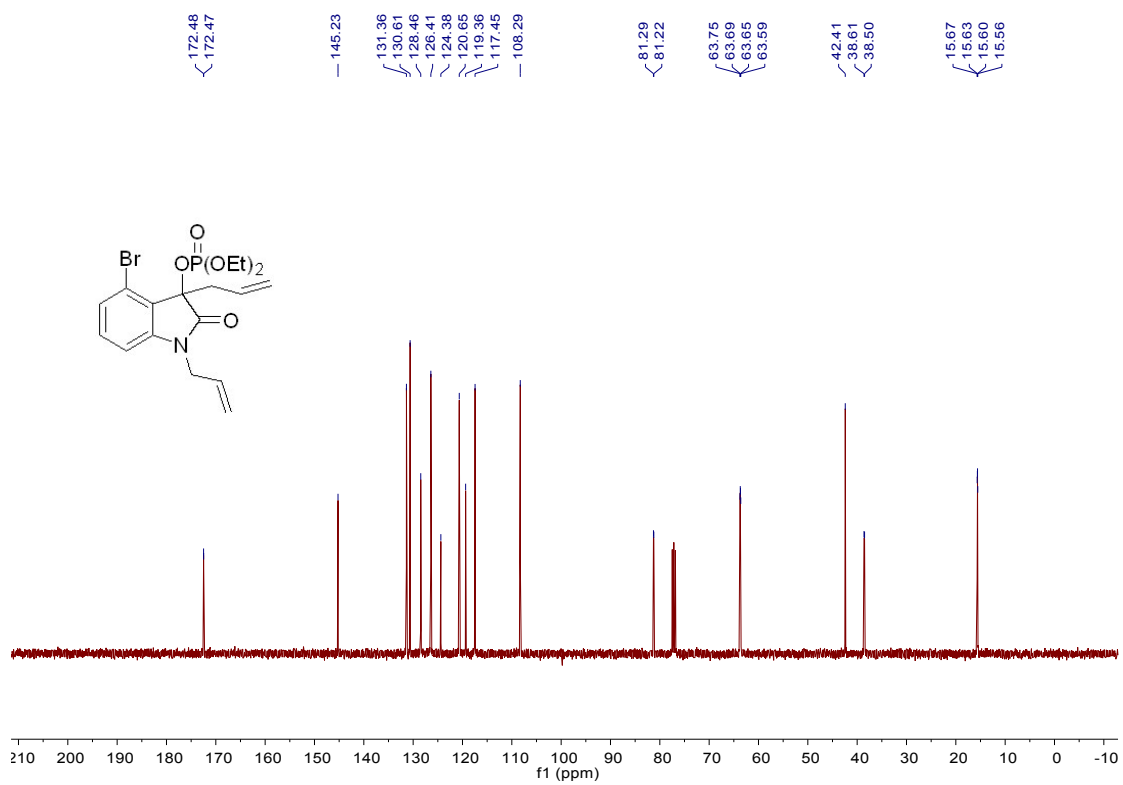

<sup>13</sup>C NMR spectrum of **7i**

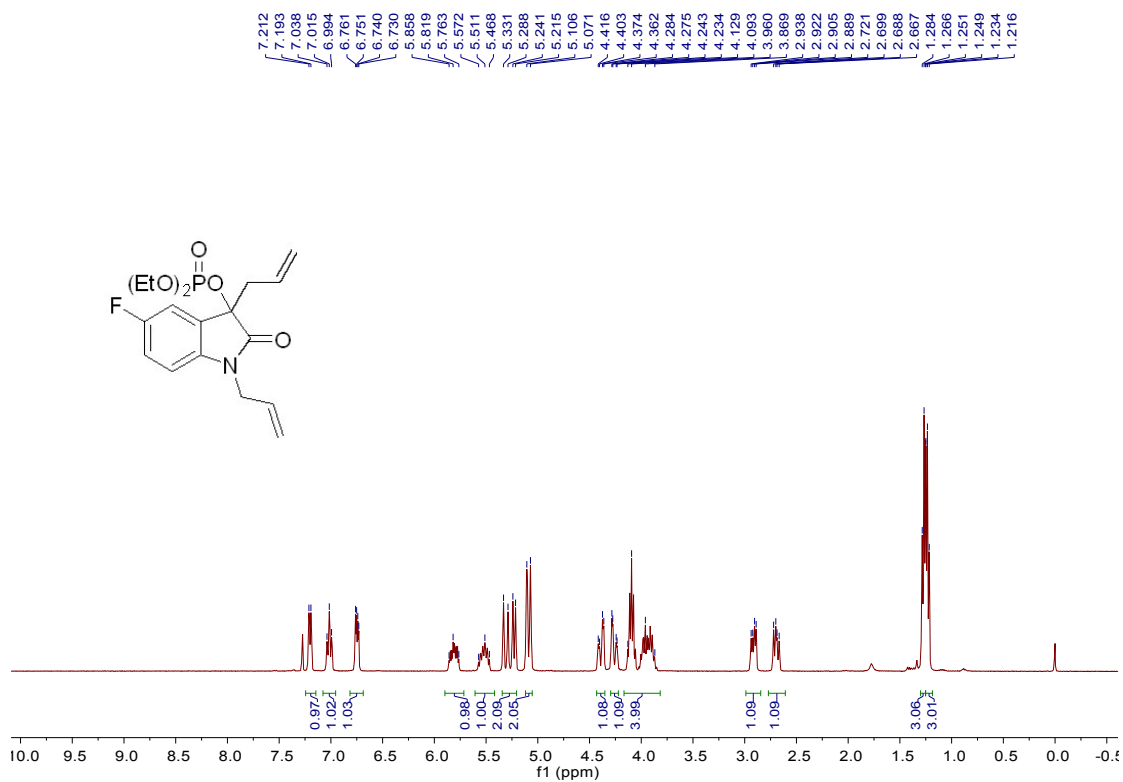

<sup>1</sup>H NMR spectrum of 7j

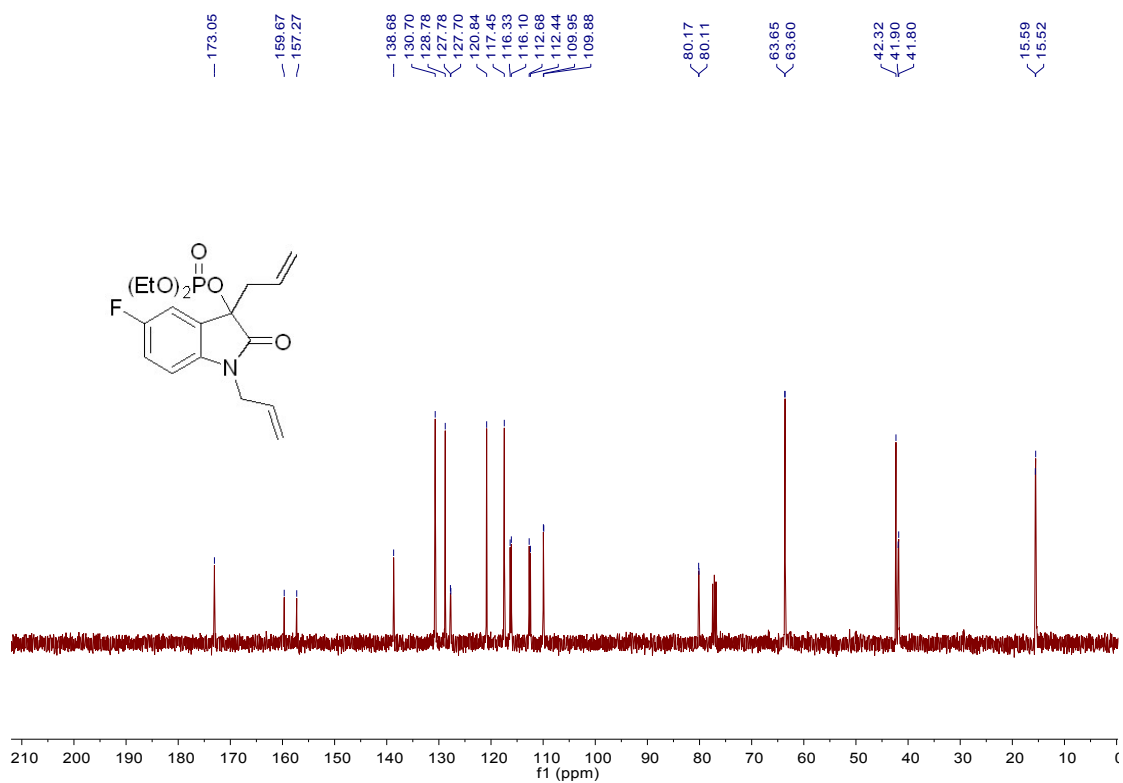

<sup>13</sup>C NMR spectrum of 7j

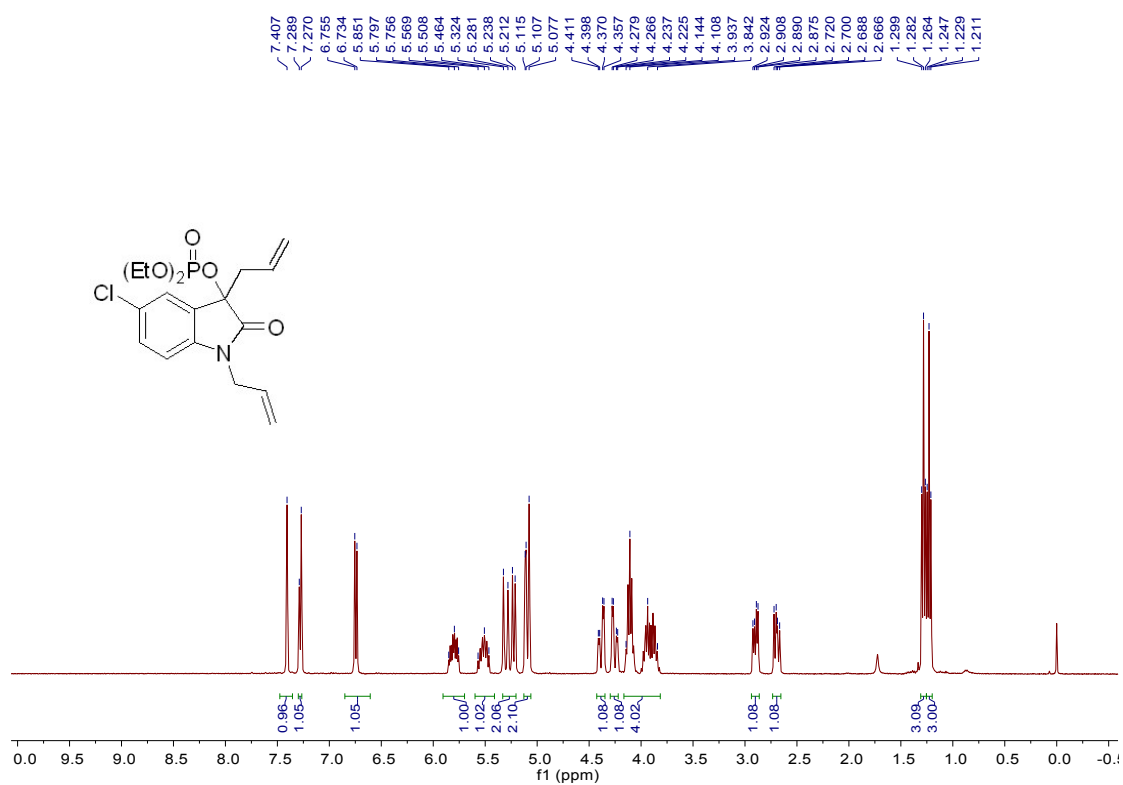

<sup>1</sup>H NMR spectrum of **7k**

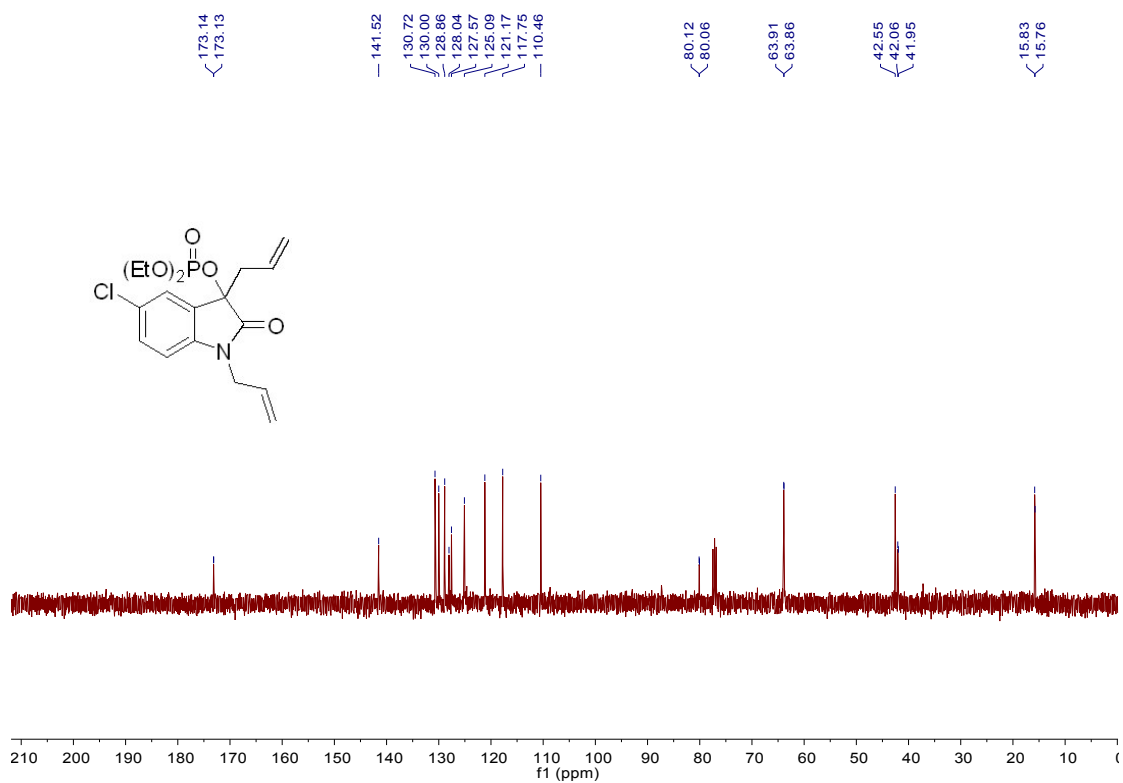

<sup>13</sup>C NMR spectrum of **7k**



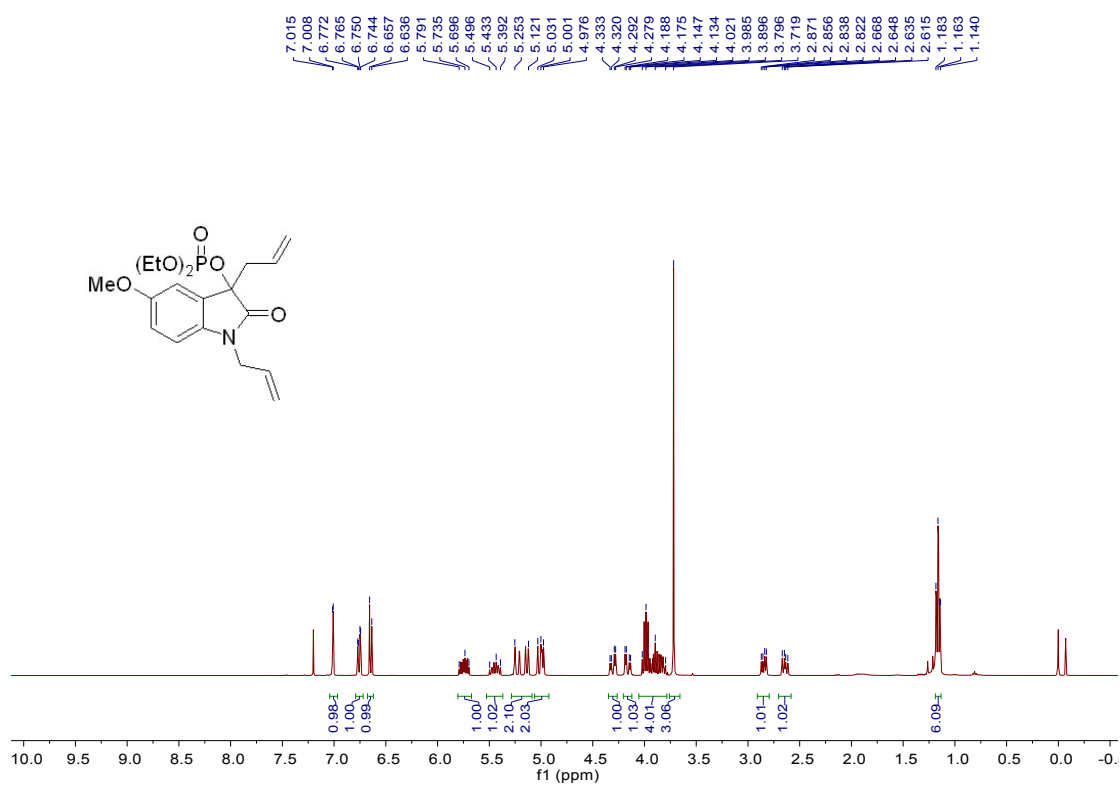

<sup>1</sup>H NMR spectrum of 7I

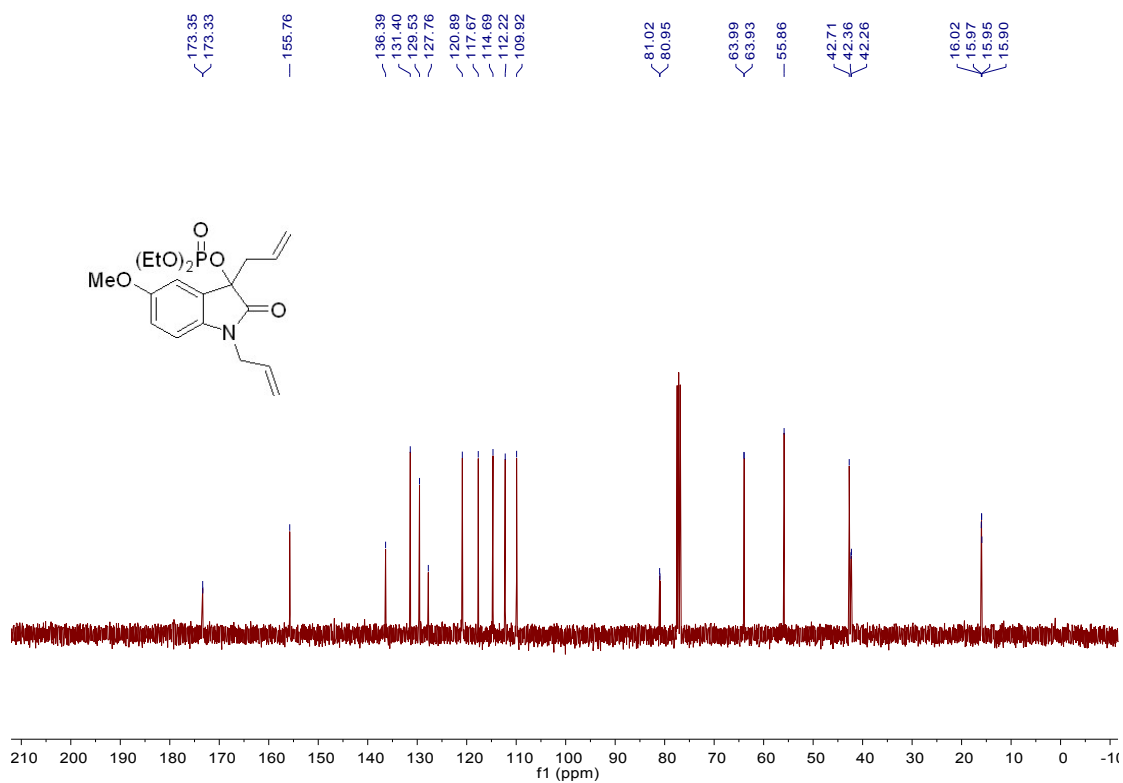

<sup>13</sup>C NMR spectrum of 7I

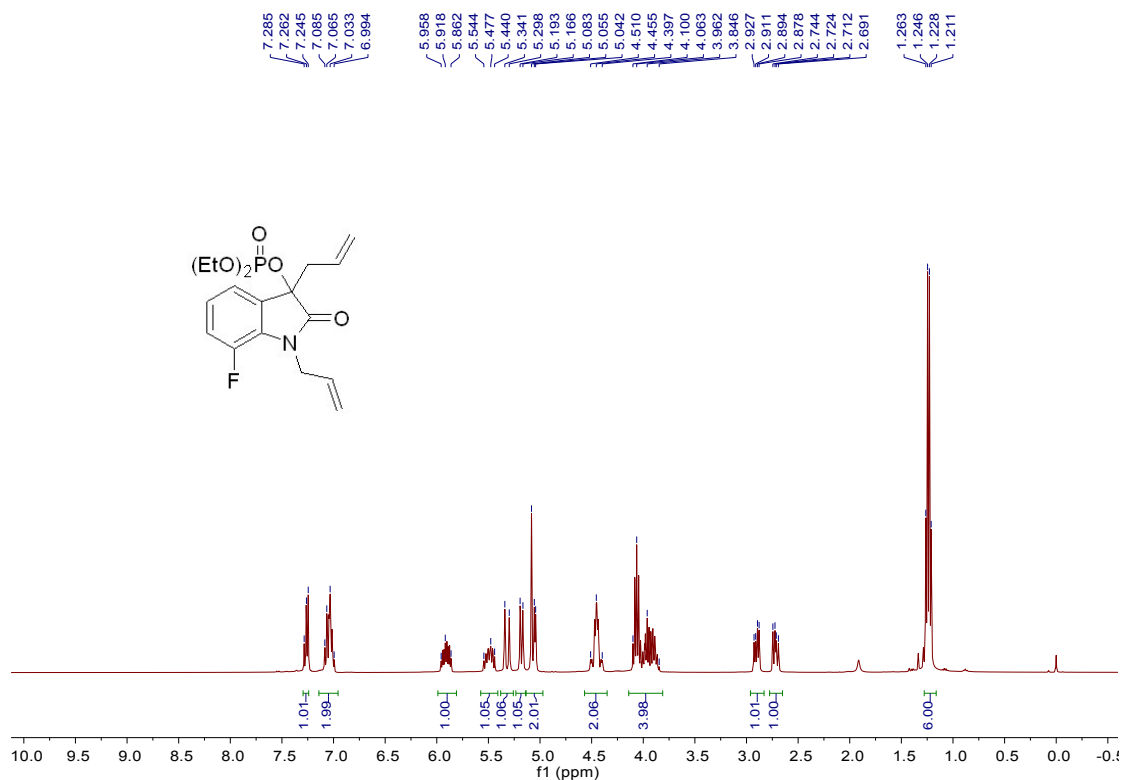

$^1\text{H}$  NMR spectrum of **7m**

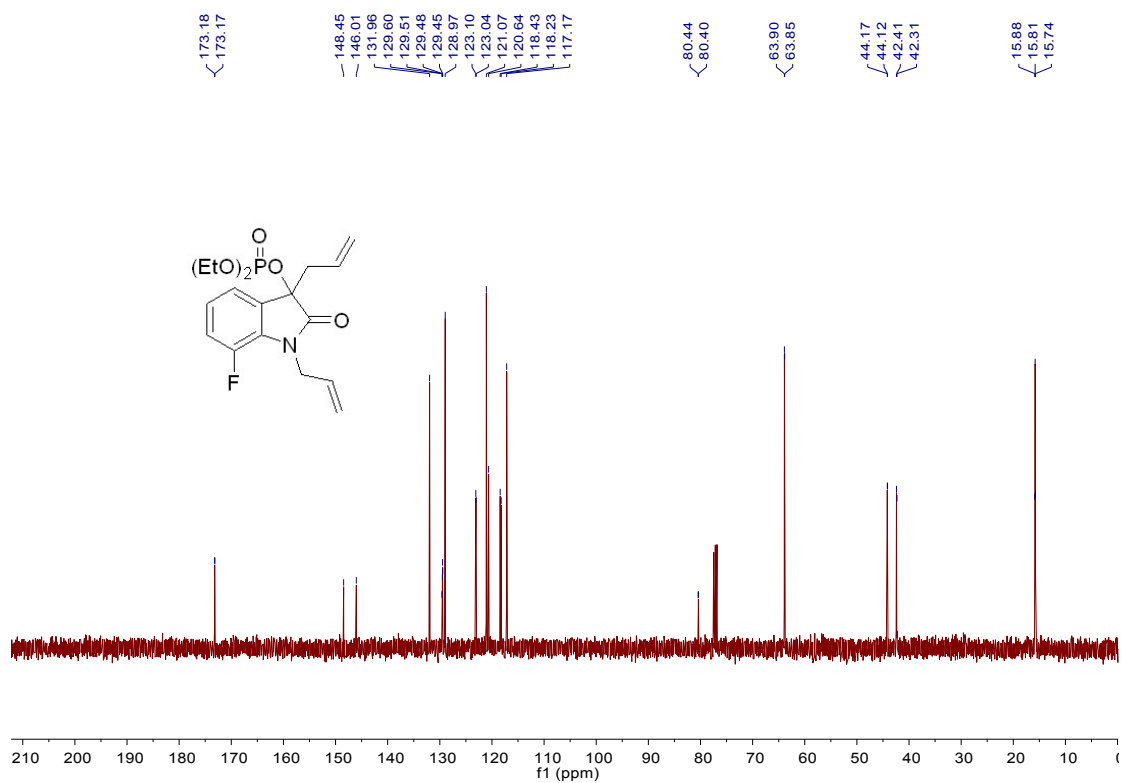

$^{13}\text{C}$  NMR spectrum of **7m**

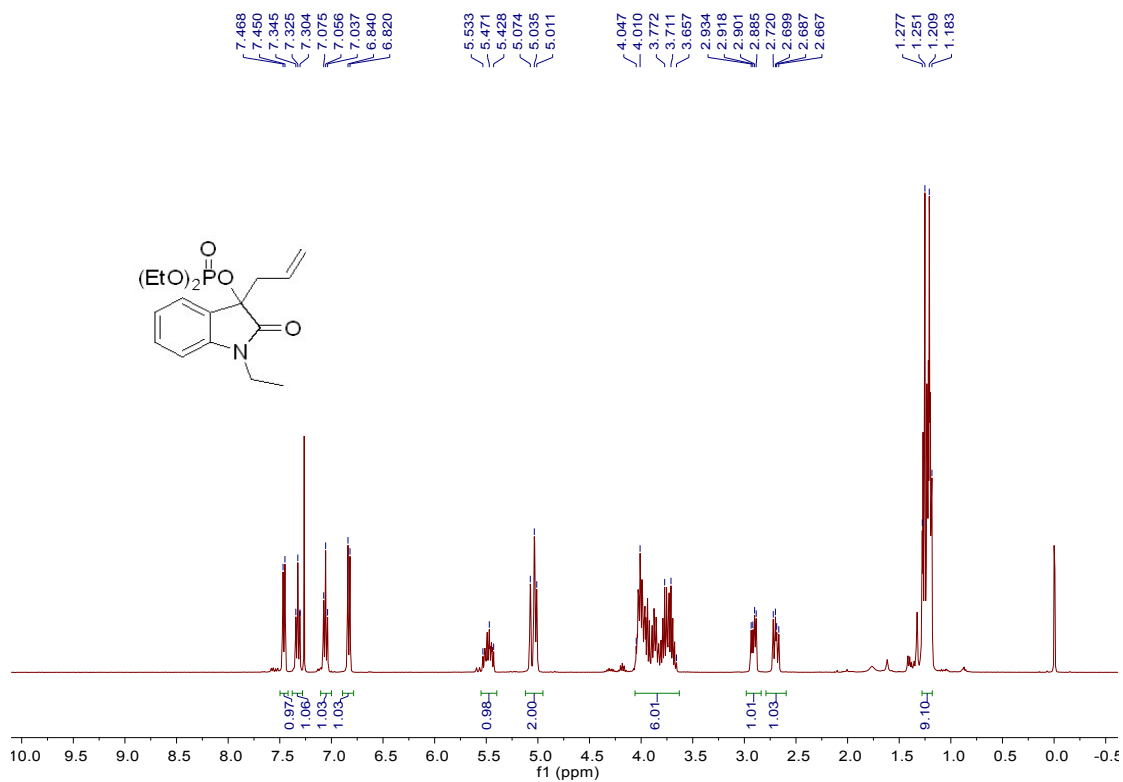

<sup>1</sup>H NMR spectrum of **7n**

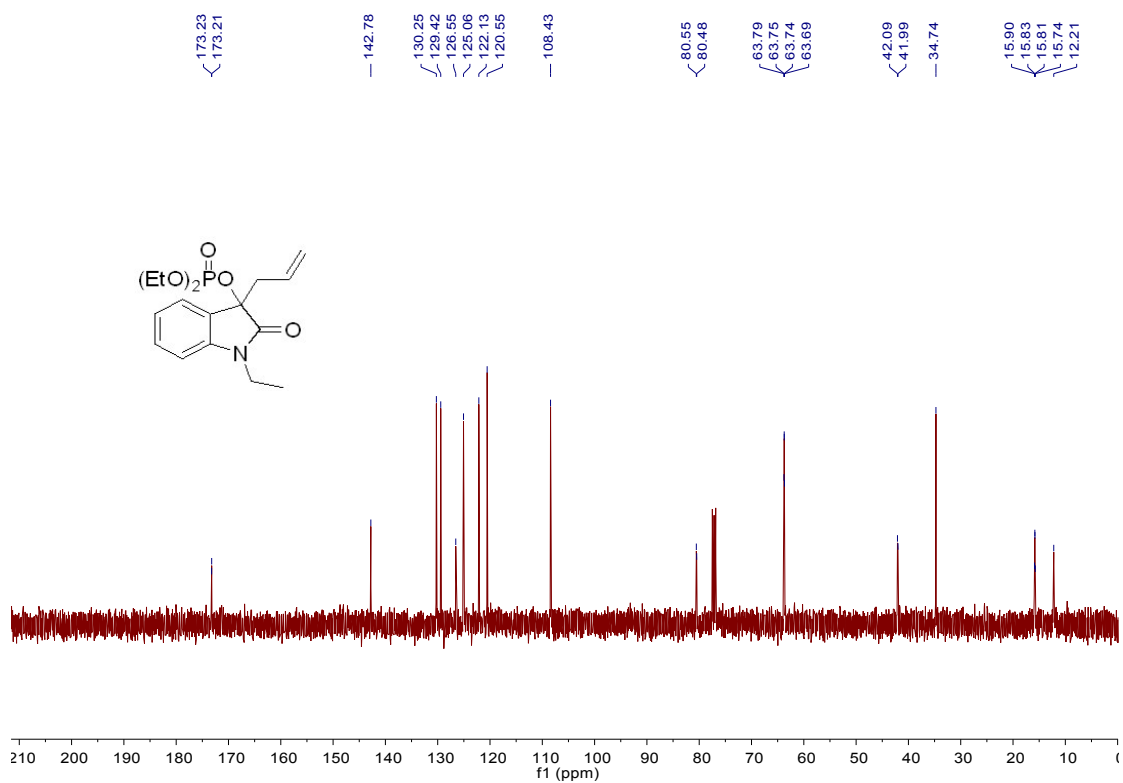

<sup>13</sup>C NMR spectrum of **7n**

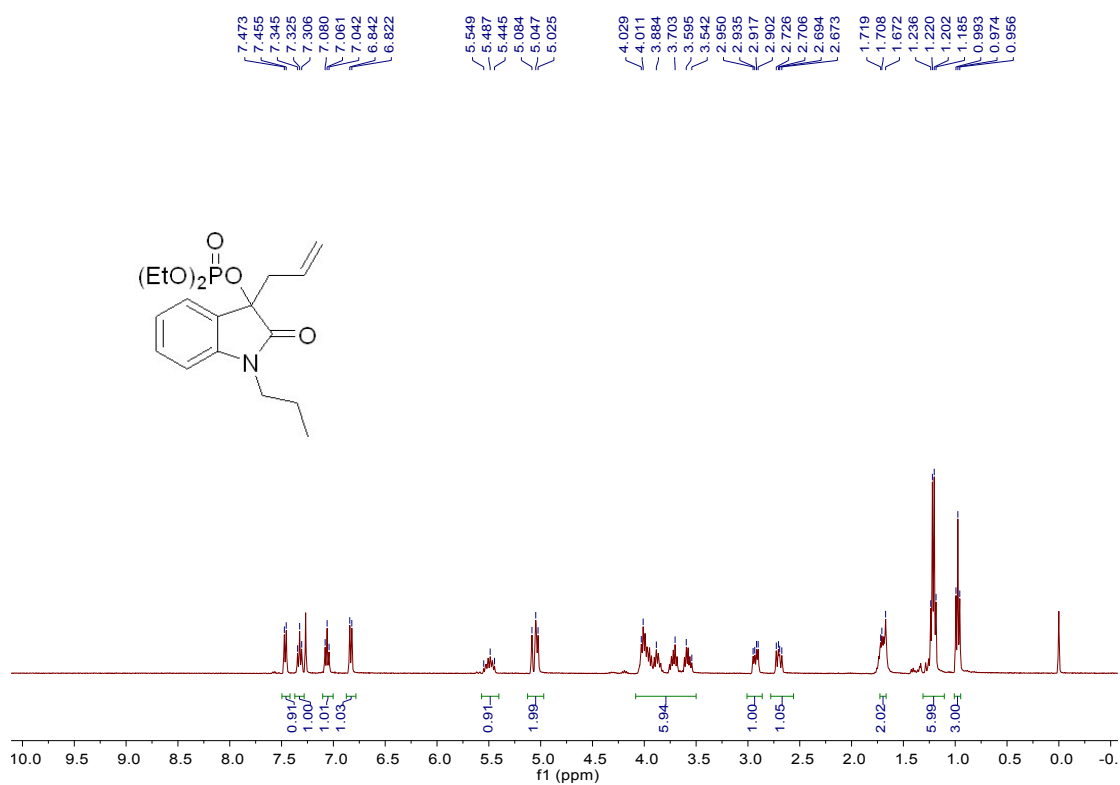

<sup>1</sup>H NMR spectrum of **7o**

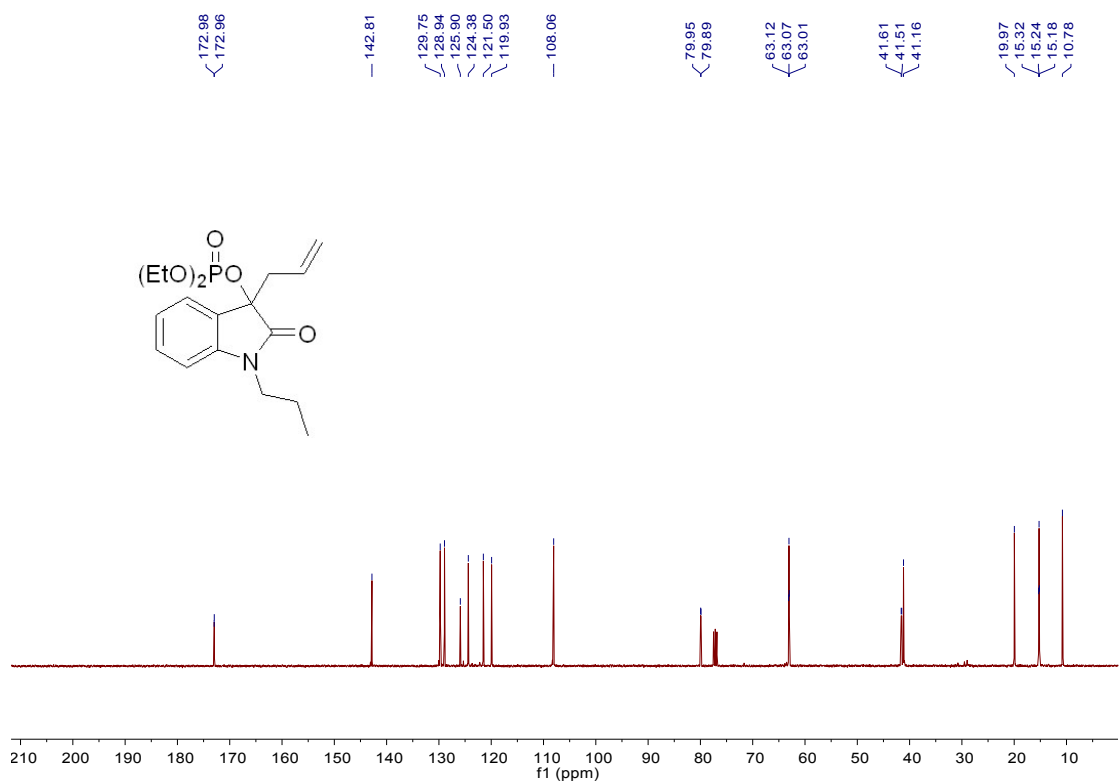

<sup>13</sup>C NMR spectrum of **7o**

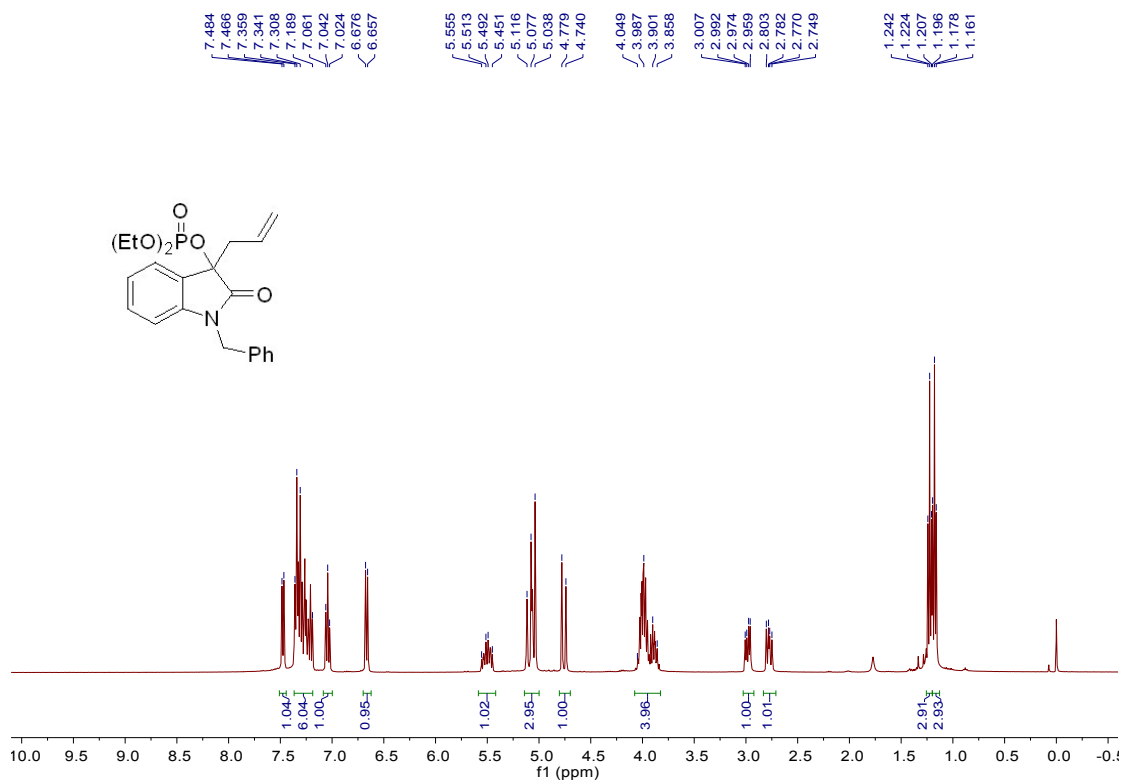

<sup>1</sup>H NMR spectrum of 7p

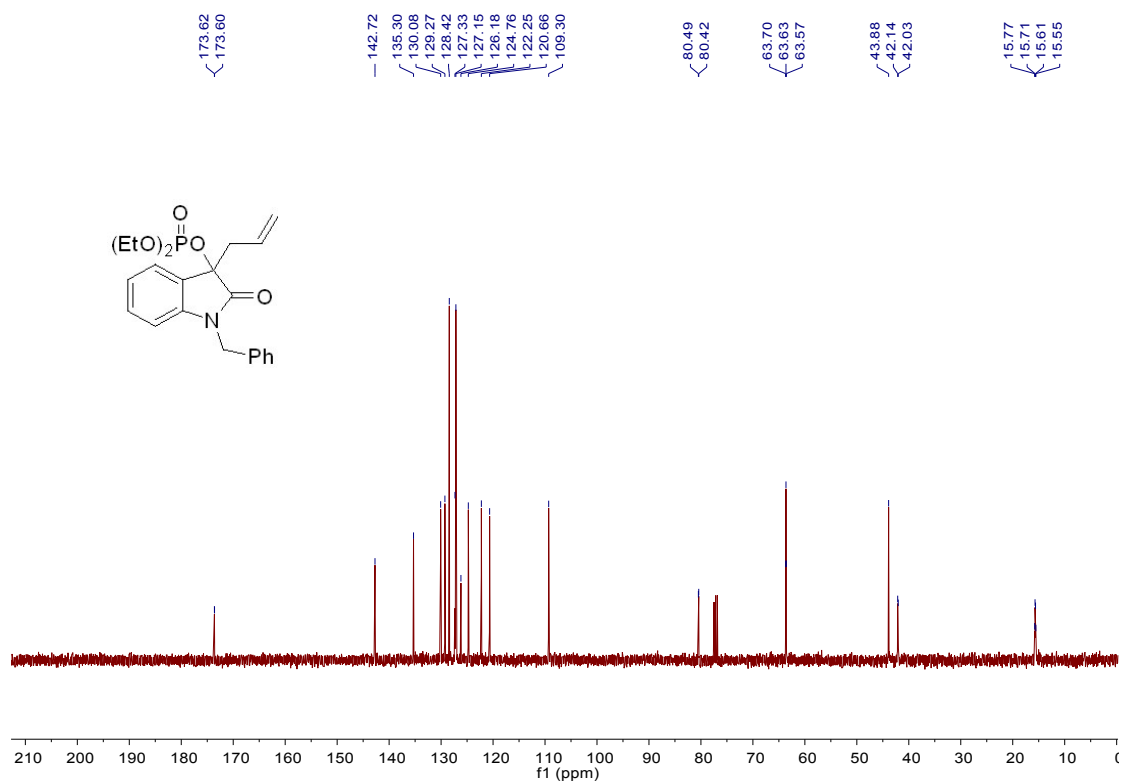

<sup>13</sup>C NMR spectrum of 7p

## X-ray structures of 4p and 4r

4p:

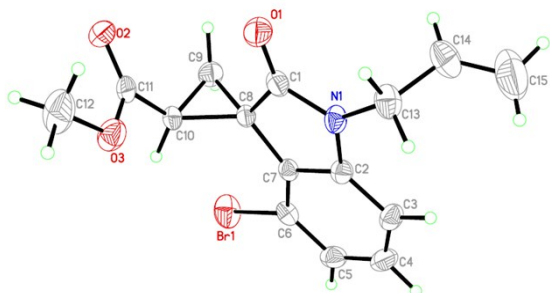

4r:

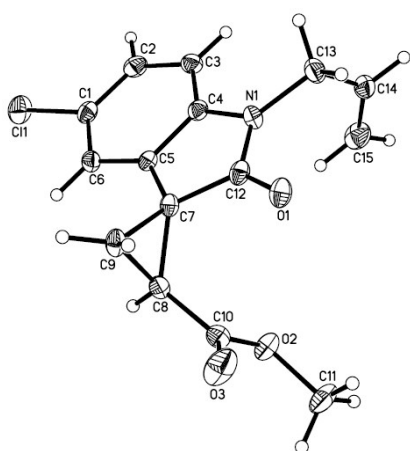

Supplement: c7ob00640c1.pdf [file c7ob00640c1.pdf]
